# Supplementary material for: Computational approach to modeling microbiome landscapes associated with chronic human disease progression
Source: PLOS journal article supplement (doi:10.1371/journal.pcbi.1010373), 2022-08-04

**S1 Fig. Removing samples containing less than  $10^4$  reads.** A total of 37 samples were excluded from downstream analysis.

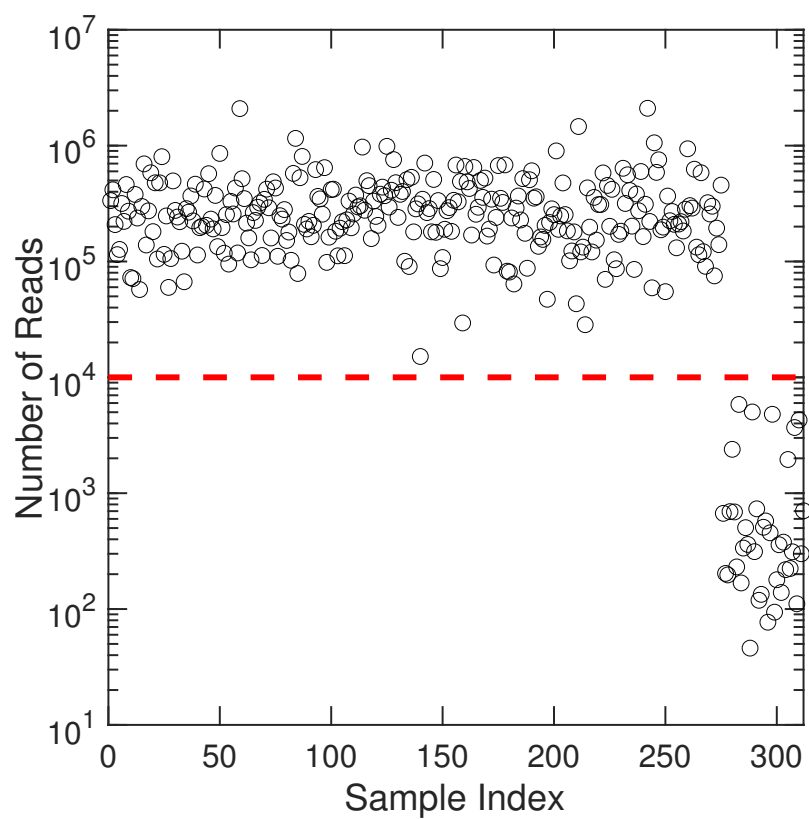

Supplement: S1 (10.1371/journal.pcbi.1010373.s001) [file journal.pcbi.1010373.s001]
