# Supplementary material for: Computational approach to modeling microbiome landscapes associated with chronic human disease progression
Source: PLoS Comput Biol. 2022 Aug 4;18(8):e1010373. doi: 10.1371/journal.pcbi.1010373 (PMC9380910; doi:10.1371/journal.pcbi.1010373)
Supplement: S2 Table — (XLSX) [file pcbi.1010373.s013.xlsx]

## Sheet: ClinicalData
#SampleID	BarcodeSequence	LinkerPrimerSequence	center_name	experiment_design_description	instrument_model	library_construction_protocol	linker	pcr_primers	platform	run_center	run_prefix	sequencing_meth	target_gene	target_subfragment	bmi	body_habitat	body_product	body_site	calprotectin	cd_behavior	cd_location	cd_resection	collection_timestamp	diagnosis_full	dna_extracted	env_biome	env_feature	env_material	env_package	fecal_date	geo_loc_name	host_common_name	host_scientific_name	host_subject_id	host_taxid	ibd_subtype	latitude	longitude	patientnumber	perianal_disease	physical_specimen_location	physical_specimen_remaining	sample_type	scientific_name	sex	study	study_id	timepoint	uc_extent
1629.SubjectIBD429	ACTTAGCT	GTGCCAGCMGCCGCGGTAA	LBNL	Jansson_Lamendella_Crohns	Illumina HiSeq 2000	Illumina V4 515F/806RBC	GT	FWD:GTGCCAGCMGCCGCGGTAA; REV:GGACTACHVGGGTWTCTAAT	Illumina	Yale Center for Genome Analysis	868_L1_L005_R1_sequences	sequencing by synthesis	16S rRNA	V4	27	UBERON:feces	UBERON:feces	UBERON:feces	not applicable	Stricturing (B2)	Ileal (L1)	yes	2009-09-02	CD	TRUE	urban biome	human-associated habitat	feces	human-gut	2009-09-02	Sweden	human	Homo sapiens	1629:739	9606	ICD_r	60.128	18.644	739	yes	LBNL	FALSE	stool	human gut metagenome	male	IBD	1629	3	not applicable
1629.SubjectIBD428	TCTCGAGC	GTGCCAGCMGCCGCGGTAA	LBNL	Jansson_Lamendella_Crohns	Illumina HiSeq 2000	Illumina V4 515F/806RBC	GT	FWD:GTGCCAGCMGCCGCGGTAA; REV:GGACTACHVGGGTWTCTAAT	Illumina	Yale Center for Genome Analysis	868_L2_L006_R1_sequences	sequencing by synthesis	16S rRNA	V4	27	UBERON:feces	UBERON:feces	UBERON:feces	125	Stricturing (B2)	Ileal (L1)	yes	2009-03-11	CD	TRUE	urban biome	human-associated habitat	feces	human-gut	2009-03-11	Sweden	human	Homo sapiens	1629:739	9606	ICD_r	60.128	18.644	739	yes	LBNL	FALSE	stool	human gut metagenome	male	IBD	1629	1	not applicable
1629.SubjectIBD050	AGGATCCG	GTGCCAGCMGCCGCGGTAA	LBNL	Jansson_Lamendella_Crohns	Illumina HiSeq 2000	Illumina V4 515F/806RBC	GT	FWD:GTGCCAGCMGCCGCGGTAA; REV:GGACTACHVGGGTWTCTAAT	Illumina	Yale Center for Genome Analysis	868_L2_L006_R1_sequences	sequencing by synthesis	16S rRNA	V4	33	UBERON:feces	UBERON:feces	UBERON:feces	263	Stricturing (B2)	Ileal (L1)	no	2009-11-17	CD	TRUE	urban biome	human-associated habitat	feces	human-gut	2009-11-17	Sweden	human	Homo sapiens	1629:93	9606	ICD_nr	60.128	18.644	93	no	LBNL	FALSE	stool	human gut metagenome	female	IBD	1629	2	not applicable
1629.SubjectIBD051	GAGACAGC	GTGCCAGCMGCCGCGGTAA	LBNL	Jansson_Lamendella_Crohns	Illumina HiSeq 2000	Illumina V4 515F/806RBC	GT	FWD:GTGCCAGCMGCCGCGGTAA; REV:GGACTACHVGGGTWTCTAAT	Illumina	Yale Center for Genome Analysis	868_L1_L005_R1_sequences	sequencing by synthesis	16S rRNA	V4	26	UBERON:feces	UBERON:feces	UBERON:feces	235	Non-stricturing, non-penetrating (B1)	Ileal and Upper-GI (L1+L4)	yes	2009-05-19	CD	TRUE	urban biome	human-associated habitat	feces	human-gut	2009-05-19	Sweden	human	Homo sapiens	1629:105	9606	ICD_r	60.128	18.644	105	no	LBNL	FALSE	stool	human gut metagenome	female	IBD	1629	1	not applicable
1629.SubjectIBD458	CTACTGAT	GTGCCAGCMGCCGCGGTAA	LBNL	Jansson_Lamendella_Crohns	Illumina HiSeq 2000	Illumina V4 515F/806RBC	GT	FWD:GTGCCAGCMGCCGCGGTAA; REV:GGACTACHVGGGTWTCTAAT	Illumina	Yale Center for Genome Analysis	868_L3_L007_R1_sequences	sequencing by synthesis	16S rRNA	V4	26	UBERON:feces	UBERON:feces	UBERON:feces	19.1	Non-stricturing, non-penetrating (B1)	Colonic (L2)	no	2010-09-03	CD	TRUE	urban biome	human-associated habitat	feces	human-gut	2010-09-03	Sweden	human	Homo sapiens	1629:849	9606	CCD	60.128	18.644	849	no	LBNL	FALSE	stool	human gut metagenome	male	IBD	1629	4	not applicable
1629.SubjectIBD490	AACGTATC	GTGCCAGCMGCCGCGGTAA	LBNL	Jansson_Lamendella_Crohns	Illumina HiSeq 2000	Illumina V4 515F/806RBC	GT	FWD:GTGCCAGCMGCCGCGGTAA; REV:GGACTACHVGGGTWTCTAAT	Illumina	Yale Center for Genome Analysis	868_L1_L005_R1_sequences	sequencing by synthesis	16S rRNA	V4	26	UBERON:feces	UBERON:feces	UBERON:feces	27	Non-stricturing, non-penetrating (B1)	Colonic (L2)	no	2009-06-09	CD	TRUE	urban biome	human-associated habitat	feces	human-gut	2009-06-09	Sweden	human	Homo sapiens	1629:884	9606	CCD	60.128	18.644	884	no	LBNL	FALSE	stool	human gut metagenome	male	IBD	1629	1	not applicable
1629.SubjectIBD491	ACTGTCGA	GTGCCAGCMGCCGCGGTAA	LBNL	Jansson_Lamendella_Crohns	Illumina HiSeq 2000	Illumina V4 515F/806RBC	GT	FWD:GTGCCAGCMGCCGCGGTAA; REV:GGACTACHVGGGTWTCTAAT	Illumina	Yale Center for Genome Analysis	868_L2_L006_R1_sequences	sequencing by synthesis	16S rRNA	V4	26	UBERON:feces	UBERON:feces	UBERON:feces	49	Non-stricturing, non-penetrating (B1)	Colonic (L2)	no	2009-12-03	CD	TRUE	urban biome	human-associated habitat	feces	human-gut	2009-12-03	Sweden	human	Homo sapiens	1629:884	9606	CCD	60.128	18.644	884	no	LBNL	FALSE	stool	human gut metagenome	male	IBD	1629	3	not applicable
1629.SubjectIBD495	ACAAAGGC	GTGCCAGCMGCCGCGGTAA	LBNL	Jansson_Lamendella_Crohns	Illumina HiSeq 2000	Illumina V4 515F/806RBC	GT	FWD:GTGCCAGCMGCCGCGGTAA; REV:GGACTACHVGGGTWTCTAAT	Illumina	Yale Center for Genome Analysis	868_L1_L005_R1_sequences	sequencing by synthesis	16S rRNA	V4	21	UBERON:feces	UBERON:feces	UBERON:feces	18.2	not applicable	not applicable	not applicable	2010-02-24	HC	TRUE	urban biome	human-associated habitat	feces	human-gut	2010-02-24	Sweden	human	Homo sapiens	1629:893	9606	HC	60.128	18.644	893	not applicable	LBNL	FALSE	stool	human gut metagenome	female	IBD	1629	2	not applicable
1629.SubjectIBD496	AAGACACA	GTGCCAGCMGCCGCGGTAA	LBNL	Jansson_Lamendella_Crohns	Illumina HiSeq 2000	Illumina V4 515F/806RBC	GT	FWD:GTGCCAGCMGCCGCGGTAA; REV:GGACTACHVGGGTWTCTAAT	Illumina	Yale Center for Genome Analysis	868_L2_L006_R1_sequences	sequencing by synthesis	16S rRNA	V4	21	UBERON:feces	UBERON:feces	UBERON:feces	20	not applicable	not applicable	not applicable	2009-10-21	HC	TRUE	urban biome	human-associated habitat	feces	human-gut	2009-10-21	Sweden	human	Homo sapiens	1629:893	9606	HC	60.128	18.644	893	not applicable	LBNL	FALSE	stool	human gut metagenome	female	IBD	1629	1	not applicable
1629.SubjectIBD497	CTACTGAT	GTGCCAGCMGCCGCGGTAA	LBNL	Jansson_Lamendella_Crohns	Illumina HiSeq 2000	Illumina V4 515F/806RBC	GT	FWD:GTGCCAGCMGCCGCGGTAA; REV:GGACTACHVGGGTWTCTAAT	Illumina	Yale Center for Genome Analysis	868_L1_L005_R1_sequences	sequencing by synthesis	16S rRNA	V4	25	UBERON:feces	UBERON:feces	UBERON:feces	38	not applicable	not applicable	not applicable	2010-01-28	HC	TRUE	urban biome	human-associated habitat	feces	human-gut	2010-01-28	Sweden	human	Homo sapiens	1629:895	9606	HC	60.128	18.644	895	not applicable	LBNL	FALSE	stool	human gut metagenome	female	IBD	1629	2	not applicable
1629.SubjectIBD498	TAGCCGGC	GTGCCAGCMGCCGCGGTAA	LBNL	Jansson_Lamendella_Crohns	Illumina HiSeq 2000	Illumina V4 515F/806RBC	GT	FWD:GTGCCAGCMGCCGCGGTAA; REV:GGACTACHVGGGTWTCTAAT	Illumina	Yale Center for Genome Analysis	868_L1_L005_R1_sequences	sequencing by synthesis	16S rRNA	V4	25	UBERON:feces	UBERON:feces	UBERON:feces	36	not applicable	not applicable	not applicable	2010-05-18	HC	TRUE	urban biome	human-associated habitat	feces	human-gut	2010-05-18	Sweden	human	Homo sapiens	1629:895	9606	HC	60.128	18.644	895	not applicable	LBNL	FALSE	stool	human gut metagenome	female	IBD	1629	3	not applicable
1629.SubjectIBD499	CCACTTGG	GTGCCAGCMGCCGCGGTAA	LBNL	Jansson_Lamendella_Crohns	Illumina HiSeq 2000	Illumina V4 515F/806RBC	GT	FWD:GTGCCAGCMGCCGCGGTAA; REV:GGACTACHVGGGTWTCTAAT	Illumina	Yale Center for Genome Analysis	868_L2_L006_R1_sequences	sequencing by synthesis	16S rRNA	V4	25	UBERON:feces	UBERON:feces	UBERON:feces	18.3	not applicable	not applicable	not applicable	2009-11-09	HC	TRUE	urban biome	human-associated habitat	feces	human-gut	2009-11-09	Sweden	human	Homo sapiens	1629:895	9606	HC	60.128	18.644	895	not applicable	LBNL	FALSE	stool	human gut metagenome	female	IBD	1629	1	not applicable
1629.SubjectIBD552	AGCACGAG	GTGCCAGCMGCCGCGGTAA	LBNL	Jansson_Lamendella_Crohns	Illumina HiSeq 2000	Illumina V4 515F/806RBC	GT	FWD:GTGCCAGCMGCCGCGGTAA; REV:GGACTACHVGGGTWTCTAAT	Illumina	Yale Center for Genome Analysis	868_L2_L006_R1_sequences	sequencing by synthesis	16S rRNA	V4	30	UBERON:feces	UBERON:feces	UBERON:feces	1103	Non-stricturing, non-penetrating (B1)	Ileocolonic (L3)	no	2009-12-16	CD	TRUE	urban biome	human-associated habitat	feces	human-gut	2009-12-16	Sweden	human	Homo sapiens	1629:913	9606	ICD_nr	60.128	18.644	913	no	LBNL	FALSE	stool	human gut metagenome	female	IBD	1629	3	not applicable
1629.SubjectIBD555	CTACAATG	GTGCCAGCMGCCGCGGTAA	LBNL	Jansson_Lamendella_Crohns	Illumina HiSeq 2000	Illumina V4 515F/806RBC	GT	FWD:GTGCCAGCMGCCGCGGTAA; REV:GGACTACHVGGGTWTCTAAT	Illumina	Yale Center for Genome Analysis	868_L2_L006_R1_sequences	sequencing by synthesis	16S rRNA	V4	18	UBERON:feces	UBERON:feces	UBERON:feces	371	Non-stricturing, non-penetrating (B1)	Colonic (L2)	no	2010-05-26	CD	TRUE	urban biome	human-associated habitat	feces	human-gut	2010-05-26	Sweden	human	Homo sapiens	1629:916	9606	CCD	60.128	18.644	916	no	LBNL	FALSE	stool	human gut metagenome	female	IBD	1629	1	not applicable
1629.SubjectIBD256	AGTTTCTC	GTGCCAGCMGCCGCGGTAA	LBNL	Jansson_Lamendella_Crohns	Illumina HiSeq 2000	Illumina V4 515F/806RBC	GT	FWD:GTGCCAGCMGCCGCGGTAA; REV:GGACTACHVGGGTWTCTAAT	Illumina	Yale Center for Genome Analysis	868_L2_L006_R1_sequences	sequencing by synthesis	16S rRNA	V4	38	UBERON:feces	UBERON:feces	UBERON:feces	827	Stricturing (B2)	Ileal (L1)	yes	2010-03-16	CD	TRUE	urban biome	human-associated habitat	feces	human-gut	2010-03-16	Sweden	human	Homo sapiens	1629:416	9606	ICD_r	60.128	18.644	416	no	LBNL	FALSE	stool	human gut metagenome	male	IBD	1629	2	not applicable
1629.SubjectIBD254	AAGACACA	GTGCCAGCMGCCGCGGTAA	LBNL	Jansson_Lamendella_Crohns	Illumina HiSeq 2000	Illumina V4 515F/806RBC	GT	FWD:GTGCCAGCMGCCGCGGTAA; REV:GGACTACHVGGGTWTCTAAT	Illumina	Yale Center for Genome Analysis	868_L1_L005_R1_sequences	sequencing by synthesis	16S rRNA	V4	27	UBERON:feces	UBERON:feces	UBERON:feces	61	Non-stricturing, non-penetrating (B1)	Colonic (L2)	no	2009-09-03	CD	TRUE	urban biome	human-associated habitat	feces	human-gut	2009-09-03	Sweden	human	Homo sapiens	1629:413	9606	CCD	60.128	18.644	413	no	LBNL	FALSE	stool	human gut metagenome	male	IBD	1629	2	not applicable
1629.SubjectIBD255	GTACCGTG	GTGCCAGCMGCCGCGGTAA	LBNL	Jansson_Lamendella_Crohns	Illumina HiSeq 2000	Illumina V4 515F/806RBC	GT	FWD:GTGCCAGCMGCCGCGGTAA; REV:GGACTACHVGGGTWTCTAAT	Illumina	Yale Center for Genome Analysis	868_L2_L006_R1_sequences	sequencing by synthesis	16S rRNA	V4	27	UBERON:feces	UBERON:feces	UBERON:feces	2814	Non-stricturing, non-penetrating (B1)	Colonic (L2)	no	2009-11-26	CD	TRUE	urban biome	human-associated habitat	feces	human-gut	2009-11-26	Sweden	human	Homo sapiens	1629:413	9606	CCD	60.128	18.644	413	no	LBNL	FALSE	stool	human gut metagenome	male	IBD	1629	3	not applicable
1629.SubjectIBD252	TGGCTCTA	GTGCCAGCMGCCGCGGTAA	LBNL	Jansson_Lamendella_Crohns	Illumina HiSeq 2000	Illumina V4 515F/806RBC	GT	FWD:GTGCCAGCMGCCGCGGTAA; REV:GGACTACHVGGGTWTCTAAT	Illumina	Yale Center for Genome Analysis	868_L2_L006_R1_sequences	sequencing by synthesis	16S rRNA	V4	27	UBERON:feces	UBERON:feces	UBERON:feces	1270	Non-stricturing, non-penetrating (B1)	Colonic (L2)	no	2011-02-24	CD	TRUE	urban biome	human-associated habitat	feces	human-gut	2011-02-24	Sweden	human	Homo sapiens	1629:413	9606	CCD	60.128	18.644	413	no	LBNL	FALSE	stool	human gut metagenome	male	IBD	1629	8	not applicable
1629.SubjectIBD253	CACACTAA	GTGCCAGCMGCCGCGGTAA	LBNL	Jansson_Lamendella_Crohns	Illumina HiSeq 2000	Illumina V4 515F/806RBC	GT	FWD:GTGCCAGCMGCCGCGGTAA; REV:GGACTACHVGGGTWTCTAAT	Illumina	Yale Center for Genome Analysis	868_L1_L005_R1_sequences	sequencing by synthesis	16S rRNA	V4	27	UBERON:feces	UBERON:feces	UBERON:feces	71	Non-stricturing, non-penetrating (B1)	Colonic (L2)	no	2009-06-10	CD	TRUE	urban biome	human-associated habitat	feces	human-gut	2009-06-10	Sweden	human	Homo sapiens	1629:413	9606	CCD	60.128	18.644	413	no	LBNL	FALSE	stool	human gut metagenome	male	IBD	1629	1	not applicable
1629.SubjectIBD250	TTAGTGCG	GTGCCAGCMGCCGCGGTAA	LBNL	Jansson_Lamendella_Crohns	Illumina HiSeq 2000	Illumina V4 515F/806RBC	GT	FWD:GTGCCAGCMGCCGCGGTAA; REV:GGACTACHVGGGTWTCTAAT	Illumina	Yale Center for Genome Analysis	868_L1_L005_R1_sequences	sequencing by synthesis	16S rRNA	V4	27	UBERON:feces	UBERON:feces	UBERON:feces	67	Non-stricturing, non-penetrating (B1)	Colonic (L2)	no	2010-08-26	CD	TRUE	urban biome	human-associated habitat	feces	human-gut	2010-08-26	Sweden	human	Homo sapiens	1629:413	9606	CCD	60.128	18.644	413	no	LBNL	FALSE	stool	human gut metagenome	male	IBD	1629	6	not applicable
1629.SubjectIBD251	TGCTCAGT	GTGCCAGCMGCCGCGGTAA	LBNL	Jansson_Lamendella_Crohns	Illumina HiSeq 2000	Illumina V4 515F/806RBC	GT	FWD:GTGCCAGCMGCCGCGGTAA; REV:GGACTACHVGGGTWTCTAAT	Illumina	Yale Center for Genome Analysis	868_L4_L008_R1_sequences	sequencing by synthesis	16S rRNA	V4	27	UBERON:feces	UBERON:feces	UBERON:feces	55	Non-stricturing, non-penetrating (B1)	Colonic (L2)	no	2010-11-25	CD	TRUE	urban biome	human-associated habitat	feces	human-gut	2010-11-25	Sweden	human	Homo sapiens	1629:413	9606	CCD	60.128	18.644	413	no	LBNL	FALSE	stool	human gut metagenome	male	IBD	1629	7	not applicable
1629.SubjectIBD397	CAGCAAAG	GTGCCAGCMGCCGCGGTAA	LBNL	Jansson_Lamendella_Crohns	Illumina HiSeq 2000	Illumina V4 515F/806RBC	GT	FWD:GTGCCAGCMGCCGCGGTAA; REV:GGACTACHVGGGTWTCTAAT	Illumina	Yale Center for Genome Analysis	868_L2_L006_R1_sequences	sequencing by synthesis	16S rRNA	V4	18	UBERON:feces	UBERON:feces	UBERON:feces	578	Non-stricturing, non-penetrating (B1)	Colonic (L2)	no	2010-12-08	CD	TRUE	urban biome	human-associated habitat	feces	human-gut	2010-12-08	Sweden	human	Homo sapiens	1629:680	9606	CCD	60.128	18.644	680	no	LBNL	FALSE	stool	human gut metagenome	female	IBD	1629	6	not applicable
1629.SubjectIBD395	CATCAAAC	GTGCCAGCMGCCGCGGTAA	LBNL	Jansson_Lamendella_Crohns	Illumina HiSeq 2000	Illumina V4 515F/806RBC	GT	FWD:GTGCCAGCMGCCGCGGTAA; REV:GGACTACHVGGGTWTCTAAT	Illumina	Yale Center for Genome Analysis	868_L2_L006_R1_sequences	sequencing by synthesis	16S rRNA	V4	18	UBERON:feces	UBERON:feces	UBERON:feces	427	Non-stricturing, non-penetrating (B1)	Colonic (L2)	no	2010-06-10	CD	TRUE	urban biome	human-associated habitat	feces	human-gut	2010-06-10	Sweden	human	Homo sapiens	1629:680	9606	CCD	60.128	18.644	680	no	LBNL	FALSE	stool	human gut metagenome	female	IBD	1629	4	not applicable
1629.SubjectIBD394	CCTTTCTT	GTGCCAGCMGCCGCGGTAA	LBNL	Jansson_Lamendella_Crohns	Illumina HiSeq 2000	Illumina V4 515F/806RBC	GT	FWD:GTGCCAGCMGCCGCGGTAA; REV:GGACTACHVGGGTWTCTAAT	Illumina	Yale Center for Genome Analysis	868_L4_L008_R1_sequences	sequencing by synthesis	16S rRNA	V4	18	UBERON:feces	UBERON:feces	UBERON:feces	389	Non-stricturing, non-penetrating (B1)	Colonic (L2)	no	2010-03-10	CD	TRUE	urban biome	human-associated habitat	feces	human-gut	2010-03-10	Sweden	human	Homo sapiens	1629:680	9606	CCD	60.128	18.644	680	no	LBNL	FALSE	stool	human gut metagenome	female	IBD	1629	3	not applicable
1629.SubjectIBD393	CGCCTTAA	GTGCCAGCMGCCGCGGTAA	LBNL	Jansson_Lamendella_Crohns	Illumina HiSeq 2000	Illumina V4 515F/806RBC	GT	FWD:GTGCCAGCMGCCGCGGTAA; REV:GGACTACHVGGGTWTCTAAT	Illumina	Yale Center for Genome Analysis	868_L2_L006_R1_sequences	sequencing by synthesis	16S rRNA	V4	18	UBERON:feces	UBERON:feces	UBERON:feces	458	Non-stricturing, non-penetrating (B1)	Colonic (L2)	no	2010-01-26	CD	TRUE	urban biome	human-associated habitat	feces	human-gut	2010-01-26	Sweden	human	Homo sapiens	1629:680	9606	CCD	60.128	18.644	680	no	LBNL	FALSE	stool	human gut metagenome	female	IBD	1629	2	not applicable
1629.SubjectIBD392	CCTATGTG	GTGCCAGCMGCCGCGGTAA	LBNL	Jansson_Lamendella_Crohns	Illumina HiSeq 2000	Illumina V4 515F/806RBC	GT	FWD:GTGCCAGCMGCCGCGGTAA; REV:GGACTACHVGGGTWTCTAAT	Illumina	Yale Center for Genome Analysis	868_L2_L006_R1_sequences	sequencing by synthesis	16S rRNA	V4	21	UBERON:feces	UBERON:feces	UBERON:feces	698	Stricturing (B2)	Ileal (L1)	yes	2010-12-15	CD	TRUE	urban biome	human-associated habitat	feces	human-gut	2010-12-15	Sweden	human	Homo sapiens	1629:671	9606	ICD_r	60.128	18.644	671	yes	LBNL	FALSE	stool	human gut metagenome	male	IBD	1629	4	not applicable
1629.SubjectIBD258	GTATGACT	GTGCCAGCMGCCGCGGTAA	LBNL	Jansson_Lamendella_Crohns	Illumina HiSeq 2000	Illumina V4 515F/806RBC	GT	FWD:GTGCCAGCMGCCGCGGTAA; REV:GGACTACHVGGGTWTCTAAT	Illumina	Yale Center for Genome Analysis	868_L1_L005_R1_sequences	sequencing by synthesis	16S rRNA	V4	38	UBERON:feces	UBERON:feces	UBERON:feces	670	Stricturing (B2)	Ileal (L1)	yes	2010-09-14	CD	TRUE	urban biome	human-associated habitat	feces	human-gut	2010-09-14	Sweden	human	Homo sapiens	1629:416	9606	ICD_r	60.128	18.644	416	no	LBNL	FALSE	stool	human gut metagenome	male	IBD	1629	4	not applicable
1629.SubjectIBD079	TTGTAGCC	GTGCCAGCMGCCGCGGTAA	LBNL	Jansson_Lamendella_Crohns	Illumina HiSeq 2000	Illumina V4 515F/806RBC	GT	FWD:GTGCCAGCMGCCGCGGTAA; REV:GGACTACHVGGGTWTCTAAT	Illumina	Yale Center for Genome Analysis	868_L2_L006_R1_sequences	sequencing by synthesis	16S rRNA	V4	21	UBERON:feces	UBERON:feces	UBERON:feces	437	Non-stricturing, non-penetrating (B1)	Colonic (L2)	no	2010-03-17	CD	TRUE	urban biome	human-associated habitat	feces	human-gut	2010-03-17	Sweden	human	Homo sapiens	1629:141	9606	CCD	60.128	18.644	141	no	LBNL	FALSE	stool	human gut metagenome	female	IBD	1629	2	not applicable
1629.SubjectIBD083	CATTCGAT	GTGCCAGCMGCCGCGGTAA	LBNL	Jansson_Lamendella_Crohns	Illumina HiSeq 2000	Illumina V4 515F/806RBC	GT	FWD:GTGCCAGCMGCCGCGGTAA; REV:GGACTACHVGGGTWTCTAAT	Illumina	Yale Center for Genome Analysis	868_L4_L008_R1_sequences	sequencing by synthesis	16S rRNA	V4	21	UBERON:feces	UBERON:feces	UBERON:feces	867	Non-stricturing, non-penetrating (B1)	Colonic (L2)	no	2011-02-16	CD	TRUE	urban biome	human-associated habitat	feces	human-gut	2011-02-16	Sweden	human	Homo sapiens	1629:141	9606	CCD	60.128	18.644	141	no	LBNL	FALSE	stool	human gut metagenome	female	IBD	1629	6	not applicable
1629.SubjectIBD082	ACGCATTG	GTGCCAGCMGCCGCGGTAA	LBNL	Jansson_Lamendella_Crohns	Illumina HiSeq 2000	Illumina V4 515F/806RBC	GT	FWD:GTGCCAGCMGCCGCGGTAA; REV:GGACTACHVGGGTWTCTAAT	Illumina	Yale Center for Genome Analysis	868_L3_L007_R1_sequences	sequencing by synthesis	16S rRNA	V4	21	UBERON:feces	UBERON:feces	UBERON:feces	332	Non-stricturing, non-penetrating (B1)	Colonic (L2)	no	2010-11-10	CD	TRUE	urban biome	human-associated habitat	feces	human-gut	2010-11-10	Sweden	human	Homo sapiens	1629:141	9606	CCD	60.128	18.644	141	no	LBNL	FALSE	stool	human gut metagenome	female	IBD	1629	5	not applicable
1629.SubjectIBD081	CATAGTTT	GTGCCAGCMGCCGCGGTAA	LBNL	Jansson_Lamendella_Crohns	Illumina HiSeq 2000	Illumina V4 515F/806RBC	GT	FWD:GTGCCAGCMGCCGCGGTAA; REV:GGACTACHVGGGTWTCTAAT	Illumina	Yale Center for Genome Analysis	868_L3_L007_R1_sequences	sequencing by synthesis	16S rRNA	V4	21	UBERON:feces	UBERON:feces	UBERON:feces	1803	Non-stricturing, non-penetrating (B1)	Colonic (L2)	no	2010-08-10	CD	TRUE	urban biome	human-associated habitat	feces	human-gut	2010-08-10	Sweden	human	Homo sapiens	1629:141	9606	CCD	60.128	18.644	141	no	LBNL	FALSE	stool	human gut metagenome	female	IBD	1629	4	not applicable
1629.SubjectIBD080	CCATGTTT	GTGCCAGCMGCCGCGGTAA	LBNL	Jansson_Lamendella_Crohns	Illumina HiSeq 2000	Illumina V4 515F/806RBC	GT	FWD:GTGCCAGCMGCCGCGGTAA; REV:GGACTACHVGGGTWTCTAAT	Illumina	Yale Center for Genome Analysis	868_L2_L006_R1_sequences	sequencing by synthesis	16S rRNA	V4	21	UBERON:feces	UBERON:feces	UBERON:feces	1117	Non-stricturing, non-penetrating (B1)	Colonic (L2)	no	2010-05-19	CD	TRUE	urban biome	human-associated habitat	feces	human-gut	2010-05-19	Sweden	human	Homo sapiens	1629:141	9606	CCD	60.128	18.644	141	no	LBNL	FALSE	stool	human gut metagenome	female	IBD	1629	3	not applicable
1629.SubjectIBD084	GACTGCAT	GTGCCAGCMGCCGCGGTAA	LBNL	Jansson_Lamendella_Crohns	Illumina HiSeq 2000	Illumina V4 515F/806RBC	GT	FWD:GTGCCAGCMGCCGCGGTAA; REV:GGACTACHVGGGTWTCTAAT	Illumina	Yale Center for Genome Analysis	868_L2_L006_R1_sequences	sequencing by synthesis	16S rRNA	V4	21	UBERON:feces	UBERON:feces	UBERON:feces	1578	Non-stricturing, non-penetrating (B1)	Colonic (L2)	no	2009-11-18	CD	TRUE	urban biome	human-associated habitat	feces	human-gut	2009-11-18	Sweden	human	Homo sapiens	1629:141	9606	CCD	60.128	18.644	141	no	LBNL	FALSE	stool	human gut metagenome	female	IBD	1629	1	not applicable
1629.SubjectIBD102	CGACTCCA	GTGCCAGCMGCCGCGGTAA	LBNL	Jansson_Lamendella_Crohns	Illumina HiSeq 2000	Illumina V4 515F/806RBC	GT	FWD:GTGCCAGCMGCCGCGGTAA; REV:GGACTACHVGGGTWTCTAAT	Illumina	Yale Center for Genome Analysis	868_L2_L006_R1_sequences	sequencing by synthesis	16S rRNA	V4	27	UBERON:feces	UBERON:feces	UBERON:feces	30	Non-stricturing, non-penetrating (B1)	Colonic (L2)	no	2010-03-17	CD	TRUE	urban biome	human-associated habitat	feces	human-gut	2010-03-17	Sweden	human	Homo sapiens	1629:187	9606	CCD	60.128	18.644	187	no	LBNL	FALSE	stool	human gut metagenome	female	IBD	1629	2	not applicable
1629.SubjectIBD103	CTAGAGAC	GTGCCAGCMGCCGCGGTAA	LBNL	Jansson_Lamendella_Crohns	Illumina HiSeq 2000	Illumina V4 515F/806RBC	GT	FWD:GTGCCAGCMGCCGCGGTAA; REV:GGACTACHVGGGTWTCTAAT	Illumina	Yale Center for Genome Analysis	868_L2_L006_R1_sequences	sequencing by synthesis	16S rRNA	V4	21	UBERON:feces	UBERON:feces	UBERON:feces	285	Non-stricturing, non-penetrating (B1)	Colonic (L2)	no	2010-06-08	CD	TRUE	urban biome	human-associated habitat	feces	human-gut	2010-06-08	Sweden	human	Homo sapiens	1629:187	9606	CCD	60.128	18.644	187	no	LBNL	FALSE	stool	human gut metagenome	female	IBD	1629	3	not applicable
1629.SubjectIBD106	TTCTACGG	GTGCCAGCMGCCGCGGTAA	LBNL	Jansson_Lamendella_Crohns	Illumina HiSeq 2000	Illumina V4 515F/806RBC	GT	FWD:GTGCCAGCMGCCGCGGTAA; REV:GGACTACHVGGGTWTCTAAT	Illumina	Yale Center for Genome Analysis	868_L1_L005_R1_sequences	sequencing by synthesis	16S rRNA	V4	23	UBERON:feces	UBERON:feces	UBERON:feces	318	Stricturing (B2)	Ileal (L1)	yes	2010-01-13	CD	TRUE	urban biome	human-associated habitat	feces	human-gut	2010-01-13	Sweden	human	Homo sapiens	1629:190	9606	ICD_r	60.128	18.644	190	no	LBNL	FALSE	stool	human gut metagenome	female	IBD	1629	4	not applicable
1629.SubjectIBD107	GATCGCAG	GTGCCAGCMGCCGCGGTAA	LBNL	Jansson_Lamendella_Crohns	Illumina HiSeq 2000	Illumina V4 515F/806RBC	GT	FWD:GTGCCAGCMGCCGCGGTAA; REV:GGACTACHVGGGTWTCTAAT	Illumina	Yale Center for Genome Analysis	868_L1_L005_R1_sequences	sequencing by synthesis	16S rRNA	V4	23	UBERON:feces	UBERON:feces	UBERON:feces	161	Stricturing (B2)	Ileal (L1)	yes	2010-04-08	CD	TRUE	urban biome	human-associated habitat	feces	human-gut	2010-04-08	Sweden	human	Homo sapiens	1629:190	9606	ICD_r	60.128	18.644	190	no	LBNL	FALSE	stool	human gut metagenome	female	IBD	1629	5	not applicable
1629.SubjectIBD104	TCCCATTG	GTGCCAGCMGCCGCGGTAA	LBNL	Jansson_Lamendella_Crohns	Illumina HiSeq 2000	Illumina V4 515F/806RBC	GT	FWD:GTGCCAGCMGCCGCGGTAA; REV:GGACTACHVGGGTWTCTAAT	Illumina	Yale Center for Genome Analysis	868_L2_L006_R1_sequences	sequencing by synthesis	16S rRNA	V4	27	UBERON:feces	UBERON:feces	UBERON:feces	15	Non-stricturing, non-penetrating (B1)	Colonic (L2)	no	2010-09-08	CD	TRUE	urban biome	human-associated habitat	feces	human-gut	2010-09-08	Sweden	human	Homo sapiens	1629:187	9606	CCD	60.128	18.644	187	no	LBNL	FALSE	stool	human gut metagenome	female	IBD	1629	4	not applicable
1629.SubjectIBD105	TACATCAC	GTGCCAGCMGCCGCGGTAA	LBNL	Jansson_Lamendella_Crohns	Illumina HiSeq 2000	Illumina V4 515F/806RBC	GT	FWD:GTGCCAGCMGCCGCGGTAA; REV:GGACTACHVGGGTWTCTAAT	Illumina	Yale Center for Genome Analysis	868_L2_L006_R1_sequences	sequencing by synthesis	16S rRNA	V4	27	UBERON:feces	UBERON:feces	UBERON:feces	39	Non-stricturing, non-penetrating (B1)	Colonic (L2)	no	2009-12-17	CD	TRUE	urban biome	human-associated habitat	feces	human-gut	2009-12-17	Sweden	human	Homo sapiens	1629:187	9606	CCD	60.128	18.644	187	no	LBNL	FALSE	stool	human gut metagenome	female	IBD	1629	1	not applicable
1629.SubjectIBD108	TTGAAGTC	GTGCCAGCMGCCGCGGTAA	LBNL	Jansson_Lamendella_Crohns	Illumina HiSeq 2000	Illumina V4 515F/806RBC	GT	FWD:GTGCCAGCMGCCGCGGTAA; REV:GGACTACHVGGGTWTCTAAT	Illumina	Yale Center for Genome Analysis	868_L2_L006_R1_sequences	sequencing by synthesis	16S rRNA	V4	23	UBERON:feces	UBERON:feces	UBERON:feces	216	Stricturing (B2)	Ileal (L1)	yes	2010-07-16	CD	TRUE	urban biome	human-associated habitat	feces	human-gut	2010-07-16	Sweden	human	Homo sapiens	1629:190	9606	ICD_r	60.128	18.644	190	no	LBNL	FALSE	stool	human gut metagenome	female	IBD	1629	6	not applicable
1629.SubjectIBD109	ACATCACT	GTGCCAGCMGCCGCGGTAA	LBNL	Jansson_Lamendella_Crohns	Illumina HiSeq 2000	Illumina V4 515F/806RBC	GT	FWD:GTGCCAGCMGCCGCGGTAA; REV:GGACTACHVGGGTWTCTAAT	Illumina	Yale Center for Genome Analysis	868_L1_L005_R1_sequences	sequencing by synthesis	16S rRNA	V4	23	UBERON:feces	UBERON:feces	UBERON:feces	413	Stricturing (B2)	Ileal (L1)	yes	2010-12-23	CD	TRUE	urban biome	human-associated habitat	feces	human-gut	2010-12-23	Sweden	human	Homo sapiens	1629:190	9606	ICD_r	60.128	18.644	190	no	LBNL	FALSE	stool	human gut metagenome	female	IBD	1629	8	not applicable
1629.SubjectIBD176	CGTTGCCT	GTGCCAGCMGCCGCGGTAA	LBNL	Jansson_Lamendella_Crohns	Illumina HiSeq 2000	Illumina V4 515F/806RBC	GT	FWD:GTGCCAGCMGCCGCGGTAA; REV:GGACTACHVGGGTWTCTAAT	Illumina	Yale Center for Genome Analysis	868_L2_L006_R1_sequences	sequencing by synthesis	16S rRNA	V4	21	UBERON:feces	UBERON:feces	UBERON:feces	414	Stricturing (B2)	Ileocolonic and Upper-GI (L3+L4)	yes	2009-10-21	CD	TRUE	urban biome	human-associated habitat	feces	human-gut	2009-10-21	Sweden	human	Homo sapiens	1629:260	9606	ICD_r	60.128	18.644	260	no	LBNL	FALSE	stool	human gut metagenome	male	IBD	1629	1	not applicable
1629.SubjectIBD175	TGAAGAGG	GTGCCAGCMGCCGCGGTAA	LBNL	Jansson_Lamendella_Crohns	Illumina HiSeq 2000	Illumina V4 515F/806RBC	GT	FWD:GTGCCAGCMGCCGCGGTAA; REV:GGACTACHVGGGTWTCTAAT	Illumina	Yale Center for Genome Analysis	868_L4_L008_R1_sequences	sequencing by synthesis	16S rRNA	V4	21	UBERON:feces	UBERON:feces	UBERON:feces	333	Stricturing (B2)	Ileocolonic and Upper-GI (L3+L4)	yes	2011-05-19	CD	TRUE	urban biome	human-associated habitat	feces	human-gut	2011-05-19	Sweden	human	Homo sapiens	1629:260	9606	ICD_r	60.128	18.644	260	no	LBNL	FALSE	stool	human gut metagenome	male	IBD	1629	6	not applicable
1629.SubjectIBD174	GACAGCGT	GTGCCAGCMGCCGCGGTAA	LBNL	Jansson_Lamendella_Crohns	Illumina HiSeq 2000	Illumina V4 515F/806RBC	GT	FWD:GTGCCAGCMGCCGCGGTAA; REV:GGACTACHVGGGTWTCTAAT	Illumina	Yale Center for Genome Analysis	868_L4_L008_R1_sequences	sequencing by synthesis	16S rRNA	V4	21	UBERON:feces	UBERON:feces	UBERON:feces	510	Stricturing (B2)	Ileocolonic and Upper-GI (L3+L4)	yes	2011-02-23	CD	TRUE	urban biome	human-associated habitat	feces	human-gut	2011-02-23	Sweden	human	Homo sapiens	1629:260	9606	ICD_r	60.128	18.644	260	no	LBNL	FALSE	stool	human gut metagenome	male	IBD	1629	5	not applicable
1629.SubjectIBD173	CAGCAAAG	GTGCCAGCMGCCGCGGTAA	LBNL	Jansson_Lamendella_Crohns	Illumina HiSeq 2000	Illumina V4 515F/806RBC	GT	FWD:GTGCCAGCMGCCGCGGTAA; REV:GGACTACHVGGGTWTCTAAT	Illumina	Yale Center for Genome Analysis	868_L3_L007_R1_sequences	sequencing by synthesis	16S rRNA	V4	21	UBERON:feces	UBERON:feces	UBERON:feces	252	Stricturing (B2)	Ileocolonic and Upper-GI (L3+L4)	yes	2010-11-09	CD	TRUE	urban biome	human-associated habitat	feces	human-gut	2010-11-09	Sweden	human	Homo sapiens	1629:260	9606	ICD_r	60.128	18.644	260	no	LBNL	FALSE	stool	human gut metagenome	male	IBD	1629	4	not applicable
1629.SubjectIBD172	ATAACCCG	GTGCCAGCMGCCGCGGTAA	LBNL	Jansson_Lamendella_Crohns	Illumina HiSeq 2000	Illumina V4 515F/806RBC	GT	FWD:GTGCCAGCMGCCGCGGTAA; REV:GGACTACHVGGGTWTCTAAT	Illumina	Yale Center for Genome Analysis	868_L2_L006_R1_sequences	sequencing by synthesis	16S rRNA	V4	21	UBERON:feces	UBERON:feces	UBERON:feces	285	Stricturing (B2)	Ileocolonic and Upper-GI (L3+L4)	yes	2010-06-23	CD	TRUE	urban biome	human-associated habitat	feces	human-gut	2010-06-23	Sweden	human	Homo sapiens	1629:260	9606	ICD_r	60.128	18.644	260	no	LBNL	FALSE	stool	human gut metagenome	male	IBD	1629	3	not applicable
1629.SubjectIBD171	GACAATCT	GTGCCAGCMGCCGCGGTAA	LBNL	Jansson_Lamendella_Crohns	Illumina HiSeq 2000	Illumina V4 515F/806RBC	GT	FWD:GTGCCAGCMGCCGCGGTAA; REV:GGACTACHVGGGTWTCTAAT	Illumina	Yale Center for Genome Analysis	868_L2_L006_R1_sequences	sequencing by synthesis	16S rRNA	V4	21	UBERON:feces	UBERON:feces	UBERON:feces	481	Stricturing (B2)	Ileocolonic and Upper-GI (L3+L4)	yes	2010-03-03	CD	TRUE	urban biome	human-associated habitat	feces	human-gut	2010-03-03	Sweden	human	Homo sapiens	1629:260	9606	ICD_r	60.128	18.644	260	no	LBNL	FALSE	stool	human gut metagenome	male	IBD	1629	2	not applicable
1629.SubjectIBD341	AACCGTTC	GTGCCAGCMGCCGCGGTAA	LBNL	Jansson_Lamendella_Crohns	Illumina HiSeq 2000	Illumina V4 515F/806RBC	GT	FWD:GTGCCAGCMGCCGCGGTAA; REV:GGACTACHVGGGTWTCTAAT	Illumina	Yale Center for Genome Analysis	868_L1_L005_R1_sequences	sequencing by synthesis	16S rRNA	V4	29	UBERON:feces	UBERON:feces	UBERON:feces	142	Penetrating (B3)	Ileocolonic (L3)	yes	2009-04-16	CD	TRUE	urban biome	human-associated habitat	feces	human-gut	2009-04-16	Sweden	human	Homo sapiens	1629:553	9606	ICD_r	60.128	18.644	553	no	LBNL	FALSE	stool	human gut metagenome	female	IBD	1629	1	not applicable
1629.SubjectIBD383	AATTTGAT	GTGCCAGCMGCCGCGGTAA	LBNL	Jansson_Lamendella_Crohns	Illumina HiSeq 2000	Illumina V4 515F/806RBC	GT	FWD:GTGCCAGCMGCCGCGGTAA; REV:GGACTACHVGGGTWTCTAAT	Illumina	Yale Center for Genome Analysis	868_L2_L006_R1_sequences	sequencing by synthesis	16S rRNA	V4	28	UBERON:feces	UBERON:feces	UBERON:feces	231	Stricturing (B2)	Ileocolonic (L3)	no	2010-02-23	CD	TRUE	urban biome	human-associated habitat	feces	human-gut	2010-02-23	Sweden	human	Homo sapiens	1629:651	9606	ICD_nr	60.128	18.644	651	no	LBNL	FALSE	stool	human gut metagenome	male	IBD	1629	5	not applicable
1629.SubjectIBD523	AACTATAG	GTGCCAGCMGCCGCGGTAA	LBNL	Jansson_Lamendella_Crohns	Illumina HiSeq 2000	Illumina V4 515F/806RBC	GT	FWD:GTGCCAGCMGCCGCGGTAA; REV:GGACTACHVGGGTWTCTAAT	Illumina	Yale Center for Genome Analysis	868_L2_L006_R1_sequences	sequencing by synthesis	16S rRNA	V4	20	UBERON:feces	UBERON:feces	UBERON:feces	25	not applicable	not applicable	not applicable	2010-04-09	HC	TRUE	urban biome	human-associated habitat	feces	human-gut	2010-04-09	Sweden	human	Homo sapiens	1629:901	9606	HC	60.128	18.644	901	not applicable	LBNL	FALSE	stool	human gut metagenome	female	IBD	1629	3	not applicable
1629.SubjectIBD348	GGTTTCAA	GTGCCAGCMGCCGCGGTAA	LBNL	Jansson_Lamendella_Crohns	Illumina HiSeq 2000	Illumina V4 515F/806RBC	GT	FWD:GTGCCAGCMGCCGCGGTAA; REV:GGACTACHVGGGTWTCTAAT	Illumina	Yale Center for Genome Analysis	868_L2_L006_R1_sequences	sequencing by synthesis	16S rRNA	V4	27	UBERON:feces	UBERON:feces	UBERON:feces	111	Non-stricturing, non-penetrating (B1)	Colonic (L2)	no	2009-11-17	CD	TRUE	urban biome	human-associated habitat	feces	human-gut	2009-11-17	Sweden	human	Homo sapiens	1629:564	9606	CCD	60.128	18.644	564	no	LBNL	FALSE	stool	human gut metagenome	male	IBD	1629	3	not applicable
1629.SubjectIBD349	TTCTACGG	GTGCCAGCMGCCGCGGTAA	LBNL	Jansson_Lamendella_Crohns	Illumina HiSeq 2000	Illumina V4 515F/806RBC	GT	FWD:GTGCCAGCMGCCGCGGTAA; REV:GGACTACHVGGGTWTCTAAT	Illumina	Yale Center for Genome Analysis	868_L2_L006_R1_sequences	sequencing by synthesis	16S rRNA	V4	27	UBERON:feces	UBERON:feces	UBERON:feces	94	Non-stricturing, non-penetrating (B1)	Colonic (L2)	no	2009-12-08	CD	TRUE	urban biome	human-associated habitat	feces	human-gut	2009-12-08	Sweden	human	Homo sapiens	1629:564	9606	CCD	60.128	18.644	564	no	LBNL	FALSE	stool	human gut metagenome	male	IBD	1629	4	not applicable
1629.SubjectIBD029	CGCTCTTT	GTGCCAGCMGCCGCGGTAA	LBNL	Jansson_Lamendella_Crohns	Illumina HiSeq 2000	Illumina V4 515F/806RBC	GT	FWD:GTGCCAGCMGCCGCGGTAA; REV:GGACTACHVGGGTWTCTAAT	Illumina	Yale Center for Genome Analysis	868_L2_L006_R1_sequences	sequencing by synthesis	16S rRNA	V4	31	UBERON:feces	UBERON:feces	UBERON:feces	708	Stricturing (B2)	Ileal (L1)	yes	2009-09-15	CD	TRUE	urban biome	human-associated habitat	feces	human-gut	2009-09-15	Sweden	human	Homo sapiens	1629:69	9606	ICD_r	60.128	18.644	69	no	LBNL	FALSE	stool	human gut metagenome	male	IBD	1629	3	not applicable
1629.SubjectIBD459	GAATCCGG	GTGCCAGCMGCCGCGGTAA	LBNL	Jansson_Lamendella_Crohns	Illumina HiSeq 2000	Illumina V4 515F/806RBC	GT	FWD:GTGCCAGCMGCCGCGGTAA; REV:GGACTACHVGGGTWTCTAAT	Illumina	Yale Center for Genome Analysis	868_L2_L006_R1_sequences	sequencing by synthesis	16S rRNA	V4	26	UBERON:feces	UBERON:feces	UBERON:feces	11.2	Non-stricturing, non-penetrating (B1)	Colonic (L2)	no	2009-12-02	CD	TRUE	urban biome	human-associated habitat	feces	human-gut	2009-12-02	Sweden	human	Homo sapiens	1629:849	9606	CCD	60.128	18.644	849	no	LBNL	FALSE	stool	human gut metagenome	male	IBD	1629	1	not applicable
1629.SubjectIBD456	TCTGCTAG	GTGCCAGCMGCCGCGGTAA	LBNL	Jansson_Lamendella_Crohns	Illumina HiSeq 2000	Illumina V4 515F/806RBC	GT	FWD:GTGCCAGCMGCCGCGGTAA; REV:GGACTACHVGGGTWTCTAAT	Illumina	Yale Center for Genome Analysis	868_L2_L006_R1_sequences	sequencing by synthesis	16S rRNA	V4	22	UBERON:feces	UBERON:feces	UBERON:feces	50	Stricturing (B2)	Ileal (L1)	yes	2010-05-11	CD	TRUE	urban biome	human-associated habitat	feces	human-gut	2010-05-11	Sweden	human	Homo sapiens	1629:846	9606	ICD_r	60.128	18.644	846	no	LBNL	FALSE	stool	human gut metagenome	female	IBD	1629	1	not applicable
1629.SubjectIBD457	CGCACTCT	GTGCCAGCMGCCGCGGTAA	LBNL	Jansson_Lamendella_Crohns	Illumina HiSeq 2000	Illumina V4 515F/806RBC	GT	FWD:GTGCCAGCMGCCGCGGTAA; REV:GGACTACHVGGGTWTCTAAT	Illumina	Yale Center for Genome Analysis	868_L2_L006_R1_sequences	sequencing by synthesis	16S rRNA	V4	26	UBERON:feces	UBERON:feces	UBERON:feces	903	Non-stricturing, non-penetrating (B1)	Colonic (L2)	no	2010-02-25	CD	TRUE	urban biome	human-associated habitat	feces	human-gut	2010-02-25	Sweden	human	Homo sapiens	1629:849	9606	CCD	60.128	18.644	849	no	LBNL	FALSE	stool	human gut metagenome	male	IBD	1629	2	not applicable
1629.SubjectIBD515	ATGACTCA	GTGCCAGCMGCCGCGGTAA	LBNL	Jansson_Lamendella_Crohns	Illumina HiSeq 2000	Illumina V4 515F/806RBC	GT	FWD:GTGCCAGCMGCCGCGGTAA; REV:GGACTACHVGGGTWTCTAAT	Illumina	Yale Center for Genome Analysis	868_L1_L005_R1_sequences	sequencing by synthesis	16S rRNA	V4	24	UBERON:feces	UBERON:feces	UBERON:feces	298	not applicable	not applicable	not applicable	2010-01-14	HC	TRUE	urban biome	human-associated habitat	feces	human-gut	2010-01-14	Sweden	human	Homo sapiens	1629:900	9606	HC	60.128	18.644	900	not applicable	LBNL	FALSE	stool	human gut metagenome	female	IBD	1629	4	not applicable
1629.SubjectIBD514	GGTAGTTG	GTGCCAGCMGCCGCGGTAA	LBNL	Jansson_Lamendella_Crohns	Illumina HiSeq 2000	Illumina V4 515F/806RBC	GT	FWD:GTGCCAGCMGCCGCGGTAA; REV:GGACTACHVGGGTWTCTAAT	Illumina	Yale Center for Genome Analysis	868_L2_L006_R1_sequences	sequencing by synthesis	16S rRNA	V4	28	UBERON:feces	UBERON:feces	UBERON:feces	126	not applicable	not applicable	not applicable	2009-09-23	HC	TRUE	urban biome	human-associated habitat	feces	human-gut	2009-09-23	Sweden	human	Homo sapiens	1629:898	9606	HC	60.128	18.644	898	not applicable	LBNL	FALSE	stool	human gut metagenome	male	IBD	1629	3	not applicable
1629.SubjectIBD517	GCCTTCTA	GTGCCAGCMGCCGCGGTAA	LBNL	Jansson_Lamendella_Crohns	Illumina HiSeq 2000	Illumina V4 515F/806RBC	GT	FWD:GTGCCAGCMGCCGCGGTAA; REV:GGACTACHVGGGTWTCTAAT	Illumina	Yale Center for Genome Analysis	868_L2_L006_R1_sequences	sequencing by synthesis	16S rRNA	V4	24	UBERON:feces	UBERON:feces	UBERON:feces	292	not applicable	not applicable	not applicable	2010-07-09	HC	TRUE	urban biome	human-associated habitat	feces	human-gut	2010-07-09	Sweden	human	Homo sapiens	1629:900	9606	HC	60.128	18.644	900	not applicable	LBNL	FALSE	stool	human gut metagenome	female	IBD	1629	6	not applicable
1629.SubjectIBD516	CCTATGTG	GTGCCAGCMGCCGCGGTAA	LBNL	Jansson_Lamendella_Crohns	Illumina HiSeq 2000	Illumina V4 515F/806RBC	GT	FWD:GTGCCAGCMGCCGCGGTAA; REV:GGACTACHVGGGTWTCTAAT	Illumina	Yale Center for Genome Analysis	868_L1_L005_R1_sequences	sequencing by synthesis	16S rRNA	V4	24	UBERON:feces	UBERON:feces	UBERON:feces	175	not applicable	not applicable	not applicable	2010-03-31	HC	TRUE	urban biome	human-associated habitat	feces	human-gut	2010-03-31	Sweden	human	Homo sapiens	1629:900	9606	HC	60.128	18.644	900	not applicable	LBNL	FALSE	stool	human gut metagenome	female	IBD	1629	5	not applicable
1629.SubjectIBD511	GTACCGTG	GTGCCAGCMGCCGCGGTAA	LBNL	Jansson_Lamendella_Crohns	Illumina HiSeq 2000	Illumina V4 515F/806RBC	GT	FWD:GTGCCAGCMGCCGCGGTAA; REV:GGACTACHVGGGTWTCTAAT	Illumina	Yale Center for Genome Analysis	868_L4_L008_R1_sequences	sequencing by synthesis	16S rRNA	V4	28	UBERON:feces	UBERON:feces	UBERON:feces	45	not applicable	not applicable	not applicable	2011-01-18	HC	TRUE	urban biome	human-associated habitat	feces	human-gut	2011-01-18	Sweden	human	Homo sapiens	1629:898	9606	HC	60.128	18.644	898	not applicable	LBNL	FALSE	stool	human gut metagenome	male	IBD	1629	8	not applicable
1629.SubjectIBD510	AAGTGTTT	GTGCCAGCMGCCGCGGTAA	LBNL	Jansson_Lamendella_Crohns	Illumina HiSeq 2000	Illumina V4 515F/806RBC	GT	FWD:GTGCCAGCMGCCGCGGTAA; REV:GGACTACHVGGGTWTCTAAT	Illumina	Yale Center for Genome Analysis	868_L3_L007_R1_sequences	sequencing by synthesis	16S rRNA	V4	28	UBERON:feces	UBERON:feces	UBERON:feces	17.9	not applicable	not applicable	not applicable	2010-10-04	HC	TRUE	urban biome	human-associated habitat	feces	human-gut	2010-10-04	Sweden	human	Homo sapiens	1629:898	9606	HC	60.128	18.644	898	not applicable	LBNL	FALSE	stool	human gut metagenome	male	IBD	1629	7	not applicable
1629.SubjectIBD513	CTATCGTA	GTGCCAGCMGCCGCGGTAA	LBNL	Jansson_Lamendella_Crohns	Illumina HiSeq 2000	Illumina V4 515F/806RBC	GT	FWD:GTGCCAGCMGCCGCGGTAA; REV:GGACTACHVGGGTWTCTAAT	Illumina	Yale Center for Genome Analysis	868_L2_L006_R1_sequences	sequencing by synthesis	16S rRNA	V4	28	UBERON:feces	UBERON:feces	UBERON:feces	27	not applicable	not applicable	not applicable	2009-06-23	HC	TRUE	urban biome	human-associated habitat	feces	human-gut	2009-06-23	Sweden	human	Homo sapiens	1629:898	9606	HC	60.128	18.644	898	not applicable	LBNL	FALSE	stool	human gut metagenome	male	IBD	1629	2	not applicable
1629.SubjectIBD512	ACACCCTC	GTGCCAGCMGCCGCGGTAA	LBNL	Jansson_Lamendella_Crohns	Illumina HiSeq 2000	Illumina V4 515F/806RBC	GT	FWD:GTGCCAGCMGCCGCGGTAA; REV:GGACTACHVGGGTWTCTAAT	Illumina	Yale Center for Genome Analysis	868_L2_L006_R1_sequences	sequencing by synthesis	16S rRNA	V4	28	UBERON:feces	UBERON:feces	UBERON:feces	81	not applicable	not applicable	not applicable	2009-04-07	HC	TRUE	urban biome	human-associated habitat	feces	human-gut	2009-04-07	Sweden	human	Homo sapiens	1629:898	9606	HC	60.128	18.644	898	not applicable	LBNL	FALSE	stool	human gut metagenome	male	IBD	1629	1	not applicable
1629.SubjectIBD519	TGAACTGC	GTGCCAGCMGCCGCGGTAA	LBNL	Jansson_Lamendella_Crohns	Illumina HiSeq 2000	Illumina V4 515F/806RBC	GT	FWD:GTGCCAGCMGCCGCGGTAA; REV:GGACTACHVGGGTWTCTAAT	Illumina	Yale Center for Genome Analysis	868_L2_L006_R1_sequences	sequencing by synthesis	16S rRNA	V4	24	UBERON:feces	UBERON:feces	UBERON:feces	156	not applicable	not applicable	not applicable	2009-04-06	HC	TRUE	urban biome	human-associated habitat	feces	human-gut	2009-04-06	Sweden	human	Homo sapiens	1629:900	9606	HC	60.128	18.644	900	not applicable	LBNL	FALSE	stool	human gut metagenome	female	IBD	1629	1	not applicable
1629.SubjectIBD518	CGTGTTTC	GTGCCAGCMGCCGCGGTAA	LBNL	Jansson_Lamendella_Crohns	Illumina HiSeq 2000	Illumina V4 515F/806RBC	GT	FWD:GTGCCAGCMGCCGCGGTAA; REV:GGACTACHVGGGTWTCTAAT	Illumina	Yale Center for Genome Analysis	868_L4_L008_R1_sequences	sequencing by synthesis	16S rRNA	V4	24	UBERON:feces	UBERON:feces	UBERON:feces	235	not applicable	not applicable	not applicable	2011-01-14	HC	TRUE	urban biome	human-associated habitat	feces	human-gut	2011-01-14	Sweden	human	Homo sapiens	1629:900	9606	HC	60.128	18.644	900	not applicable	LBNL	FALSE	stool	human gut metagenome	female	IBD	1629	8	not applicable
1629.SubjectIBD028	TACCTTGG	GTGCCAGCMGCCGCGGTAA	LBNL	Jansson_Lamendella_Crohns	Illumina HiSeq 2000	Illumina V4 515F/806RBC	GT	FWD:GTGCCAGCMGCCGCGGTAA; REV:GGACTACHVGGGTWTCTAAT	Illumina	Yale Center for Genome Analysis	868_L2_L006_R1_sequences	sequencing by synthesis	16S rRNA	V4	31	UBERON:feces	UBERON:feces	UBERON:feces	307	Stricturing (B2)	Ileal (L1)	yes	2009-06-08	CD	TRUE	urban biome	human-associated habitat	feces	human-gut	2009-06-08	Sweden	human	Homo sapiens	1629:69	9606	ICD_r	60.128	18.644	69	no	LBNL	FALSE	stool	human gut metagenome	male	IBD	1629	2	not applicable
1629.SubjectIBD339	AAGACCGG	GTGCCAGCMGCCGCGGTAA	LBNL	Jansson_Lamendella_Crohns	Illumina HiSeq 2000	Illumina V4 515F/806RBC	GT	FWD:GTGCCAGCMGCCGCGGTAA; REV:GGACTACHVGGGTWTCTAAT	Illumina	Yale Center for Genome Analysis	868_L2_L006_R1_sequences	sequencing by synthesis	16S rRNA	V4	29	UBERON:feces	UBERON:feces	UBERON:feces	172	Penetrating (B3)	Ileocolonic (L3)	yes	2010-03-25	CD	TRUE	urban biome	human-associated habitat	feces	human-gut	2010-03-25	Sweden	human	Homo sapiens	1629:553	9606	ICD_r	60.128	18.644	553	no	LBNL	FALSE	stool	human gut metagenome	female	IBD	1629	5	not applicable
1629.SubjectIBD334	GTCGCTGT	GTGCCAGCMGCCGCGGTAA	LBNL	Jansson_Lamendella_Crohns	Illumina HiSeq 2000	Illumina V4 515F/806RBC	GT	FWD:GTGCCAGCMGCCGCGGTAA; REV:GGACTACHVGGGTWTCTAAT	Illumina	Yale Center for Genome Analysis	868_L2_L006_R1_sequences	sequencing by synthesis	16S rRNA	V4	25	UBERON:feces	UBERON:feces	UBERON:feces	32	Penetrating (B3)	Ileal (L1)	yes	2009-12-02	CD	TRUE	urban biome	human-associated habitat	feces	human-gut	2009-12-02	Sweden	human	Homo sapiens	1629:543	9606	ICD_r	60.128	18.644	543	yes	LBNL	FALSE	stool	human gut metagenome	male	IBD	1629	1	not applicable
1629.SubjectIBD331	CTCCCATA	GTGCCAGCMGCCGCGGTAA	LBNL	Jansson_Lamendella_Crohns	Illumina HiSeq 2000	Illumina V4 515F/806RBC	GT	FWD:GTGCCAGCMGCCGCGGTAA; REV:GGACTACHVGGGTWTCTAAT	Illumina	Yale Center for Genome Analysis	868_L3_L007_R1_sequences	sequencing by synthesis	16S rRNA	V4	25	UBERON:feces	UBERON:feces	UBERON:feces	93	Penetrating (B3)	Ileal (L1)	yes	2010-09-02	CD	TRUE	urban biome	human-associated habitat	feces	human-gut	2010-09-02	Sweden	human	Homo sapiens	1629:543	9606	ICD_r	60.128	18.644	543	yes	LBNL	FALSE	stool	human gut metagenome	male	IBD	1629	4	not applicable
1629.SubjectIBD330	CGATATTC	GTGCCAGCMGCCGCGGTAA	LBNL	Jansson_Lamendella_Crohns	Illumina HiSeq 2000	Illumina V4 515F/806RBC	GT	FWD:GTGCCAGCMGCCGCGGTAA; REV:GGACTACHVGGGTWTCTAAT	Illumina	Yale Center for Genome Analysis	868_L2_L006_R1_sequences	sequencing by synthesis	16S rRNA	V4	25	UBERON:feces	UBERON:feces	UBERON:feces	43	Penetrating (B3)	Ileal (L1)	yes	2010-06-02	CD	TRUE	urban biome	human-associated habitat	feces	human-gut	2010-06-02	Sweden	human	Homo sapiens	1629:543	9606	ICD_r	60.128	18.644	543	yes	LBNL	FALSE	stool	human gut metagenome	male	IBD	1629	3	not applicable
1629.SubjectIBD333	AAGACCGG	GTGCCAGCMGCCGCGGTAA	LBNL	Jansson_Lamendella_Crohns	Illumina HiSeq 2000	Illumina V4 515F/806RBC	GT	FWD:GTGCCAGCMGCCGCGGTAA; REV:GGACTACHVGGGTWTCTAAT	Illumina	Yale Center for Genome Analysis	868_L4_L008_R1_sequences	sequencing by synthesis	16S rRNA	V4	25	UBERON:feces	UBERON:feces	UBERON:feces	35	Penetrating (B3)	Ileal (L1)	yes	2011-04-05	CD	TRUE	urban biome	human-associated habitat	feces	human-gut	2011-04-05	Sweden	human	Homo sapiens	1629:543	9606	ICD_r	60.128	18.644	543	yes	LBNL	FALSE	stool	human gut metagenome	male	IBD	1629	6	not applicable
1629.SubjectIBD332	ATGGGCTC	GTGCCAGCMGCCGCGGTAA	LBNL	Jansson_Lamendella_Crohns	Illumina HiSeq 2000	Illumina V4 515F/806RBC	GT	FWD:GTGCCAGCMGCCGCGGTAA; REV:GGACTACHVGGGTWTCTAAT	Illumina	Yale Center for Genome Analysis	868_L2_L006_R1_sequences	sequencing by synthesis	16S rRNA	V4	25	UBERON:feces	UBERON:feces	UBERON:feces	29	Penetrating (B3)	Ileal (L1)	yes	2010-11-24	CD	TRUE	urban biome	human-associated habitat	feces	human-gut	2010-11-24	Sweden	human	Homo sapiens	1629:543	9606	ICD_r	60.128	18.644	543	yes	LBNL	FALSE	stool	human gut metagenome	male	IBD	1629	5	not applicable
1629.SubjectIBD209	TGACCCAG	GTGCCAGCMGCCGCGGTAA	LBNL	Jansson_Lamendella_Crohns	Illumina HiSeq 2000	Illumina V4 515F/806RBC	GT	FWD:GTGCCAGCMGCCGCGGTAA; REV:GGACTACHVGGGTWTCTAAT	Illumina	Yale Center for Genome Analysis	868_L4_L008_R1_sequences	sequencing by synthesis	16S rRNA	V4	23	UBERON:feces	UBERON:feces	UBERON:feces	289	Penetrating (B3)	Ileal (L1)	yes	2011-04-15	CD	TRUE	urban biome	human-associated habitat	feces	human-gut	2011-04-15	Sweden	human	Homo sapiens	1629:315	9606	ICD_r	60.128	18.644	315	no	LBNL	FALSE	stool	human gut metagenome	male	IBD	1629	6	not applicable
1629.SubjectIBD208	GATTAGCA	GTGCCAGCMGCCGCGGTAA	LBNL	Jansson_Lamendella_Crohns	Illumina HiSeq 2000	Illumina V4 515F/806RBC	GT	FWD:GTGCCAGCMGCCGCGGTAA; REV:GGACTACHVGGGTWTCTAAT	Illumina	Yale Center for Genome Analysis	868_L3_L007_R1_sequences	sequencing by synthesis	16S rRNA	V4	23	UBERON:feces	UBERON:feces	UBERON:feces	316	Penetrating (B3)	Ileal (L1)	yes	2010-10-19	CD	TRUE	urban biome	human-associated habitat	feces	human-gut	2010-10-19	Sweden	human	Homo sapiens	1629:315	9606	ICD_r	60.128	18.644	315	no	LBNL	FALSE	stool	human gut metagenome	male	IBD	1629	4	not applicable
1629.SubjectIBD205	GGTTCACC	GTGCCAGCMGCCGCGGTAA	LBNL	Jansson_Lamendella_Crohns	Illumina HiSeq 2000	Illumina V4 515F/806RBC	GT	FWD:GTGCCAGCMGCCGCGGTAA; REV:GGACTACHVGGGTWTCTAAT	Illumina	Yale Center for Genome Analysis	868_L1_L005_R1_sequences	sequencing by synthesis	16S rRNA	V4	23	UBERON:feces	UBERON:feces	UBERON:feces	281	Penetrating (B3)	Ileal (L1)	yes	2010-04-13	CD	TRUE	urban biome	human-associated habitat	feces	human-gut	2010-04-13	Sweden	human	Homo sapiens	1629:315	9606	ICD_r	60.128	18.644	315	no	LBNL	FALSE	stool	human gut metagenome	male	IBD	1629	2	not applicable
1629.SubjectIBD204	GAATGCAA	GTGCCAGCMGCCGCGGTAA	LBNL	Jansson_Lamendella_Crohns	Illumina HiSeq 2000	Illumina V4 515F/806RBC	GT	FWD:GTGCCAGCMGCCGCGGTAA; REV:GGACTACHVGGGTWTCTAAT	Illumina	Yale Center for Genome Analysis	868_L2_L006_R1_sequences	sequencing by synthesis	16S rRNA	V4	23	UBERON:feces	UBERON:feces	UBERON:feces	510	Penetrating (B3)	Ileal (L1)	yes	2010-01-26	CD	TRUE	urban biome	human-associated habitat	feces	human-gut	2010-01-26	Sweden	human	Homo sapiens	1629:315	9606	ICD_r	60.128	18.644	315	no	LBNL	FALSE	stool	human gut metagenome	male	IBD	1629	1	not applicable
1629.SubjectIBD207	GATCTCAT	GTGCCAGCMGCCGCGGTAA	LBNL	Jansson_Lamendella_Crohns	Illumina HiSeq 2000	Illumina V4 515F/806RBC	GT	FWD:GTGCCAGCMGCCGCGGTAA; REV:GGACTACHVGGGTWTCTAAT	Illumina	Yale Center for Genome Analysis	868_L2_L006_R1_sequences	sequencing by synthesis	16S rRNA	V4	23	UBERON:feces	UBERON:feces	UBERON:feces	396	Penetrating (B3)	Ileal (L1)	yes	2010-07-08	CD	TRUE	urban biome	human-associated habitat	feces	human-gut	2010-07-08	Sweden	human	Homo sapiens	1629:315	9606	ICD_r	60.128	18.644	315	no	LBNL	FALSE	stool	human gut metagenome	male	IBD	1629	3	not applicable
1629.SubjectIBD206	TCACAGAT	GTGCCAGCMGCCGCGGTAA	LBNL	Jansson_Lamendella_Crohns	Illumina HiSeq 2000	Illumina V4 515F/806RBC	GT	FWD:GTGCCAGCMGCCGCGGTAA; REV:GGACTACHVGGGTWTCTAAT	Illumina	Yale Center for Genome Analysis	868_L4_L008_R1_sequences	sequencing by synthesis	16S rRNA	V4	23	UBERON:feces	UBERON:feces	UBERON:feces	281	Penetrating (B3)	Ileal (L1)	yes	2010-04-13	CD	TRUE	urban biome	human-associated habitat	feces	human-gut	2010-04-13	Sweden	human	Homo sapiens	1629:315	9606	ICD_r	60.128	18.644	315	no	LBNL	FALSE	stool	human gut metagenome	male	IBD	1629	2	not applicable
1629.SubjectIBD023	CGTACAGT	GTGCCAGCMGCCGCGGTAA	LBNL	Jansson_Lamendella_Crohns	Illumina HiSeq 2000	Illumina V4 515F/806RBC	GT	FWD:GTGCCAGCMGCCGCGGTAA; REV:GGACTACHVGGGTWTCTAAT	Illumina	Yale Center for Genome Analysis	868_L2_L006_R1_sequences	sequencing by synthesis	16S rRNA	V4	31	UBERON:feces	UBERON:feces	UBERON:feces	577	Stricturing (B2)	Ileal (L1)	yes	2010-03-23	CD	TRUE	urban biome	human-associated habitat	feces	human-gut	2010-03-23	Sweden	human	Homo sapiens	1629:69	9606	ICD_r	60.128	18.644	69	no	LBNL	FALSE	stool	human gut metagenome	male	IBD	1629	5	not applicable
1629.SubjectIBD025	CCTTATAG	GTGCCAGCMGCCGCGGTAA	LBNL	Jansson_Lamendella_Crohns	Illumina HiSeq 2000	Illumina V4 515F/806RBC	GT	FWD:GTGCCAGCMGCCGCGGTAA; REV:GGACTACHVGGGTWTCTAAT	Illumina	Yale Center for Genome Analysis	868_L3_L007_R1_sequences	sequencing by synthesis	16S rRNA	V4	31	UBERON:feces	UBERON:feces	UBERON:feces	646	Stricturing (B2)	Ileal (L1)	yes	2010-09-15	CD	TRUE	urban biome	human-associated habitat	feces	human-gut	2010-09-15	Sweden	human	Homo sapiens	1629:69	9606	ICD_r	60.128	18.644	69	no	LBNL	FALSE	stool	human gut metagenome	male	IBD	1629	7	not applicable
1629.SubjectIBD024	GTATGACT	GTGCCAGCMGCCGCGGTAA	LBNL	Jansson_Lamendella_Crohns	Illumina HiSeq 2000	Illumina V4 515F/806RBC	GT	FWD:GTGCCAGCMGCCGCGGTAA; REV:GGACTACHVGGGTWTCTAAT	Illumina	Yale Center for Genome Analysis	868_L2_L006_R1_sequences	sequencing by synthesis	16S rRNA	V4	31	UBERON:feces	UBERON:feces	UBERON:feces	184	Stricturing (B2)	Ileal (L1)	yes	2010-05-27	CD	TRUE	urban biome	human-associated habitat	feces	human-gut	2010-05-27	Sweden	human	Homo sapiens	1629:69	9606	ICD_r	60.128	18.644	69	no	LBNL	FALSE	stool	human gut metagenome	male	IBD	1629	6	not applicable
1629.SubjectIBD146	GACCGAGC	GTGCCAGCMGCCGCGGTAA	LBNL	Jansson_Lamendella_Crohns	Illumina HiSeq 2000	Illumina V4 515F/806RBC	GT	FWD:GTGCCAGCMGCCGCGGTAA; REV:GGACTACHVGGGTWTCTAAT	Illumina	Yale Center for Genome Analysis	868_L2_L006_R1_sequences	sequencing by synthesis	16S rRNA	V4	22	UBERON:feces	UBERON:feces	UBERON:feces	90	Stricturing (B2)	Ileocolonic (L3)	yes	2010-03-08	CD	TRUE	urban biome	human-associated habitat	feces	human-gut	2010-03-08	Sweden	human	Homo sapiens	1629:217	9606	ICD_r	60.128	18.644	217	yes	LBNL	FALSE	stool	human gut metagenome	male	IBD	1629	1	not applicable
1629.SubjectIBD144	AGGATCCG	GTGCCAGCMGCCGCGGTAA	LBNL	Jansson_Lamendella_Crohns	Illumina HiSeq 2000	Illumina V4 515F/806RBC	GT	FWD:GTGCCAGCMGCCGCGGTAA; REV:GGACTACHVGGGTWTCTAAT	Illumina	Yale Center for Genome Analysis	868_L1_L005_R1_sequences	sequencing by synthesis	16S rRNA	V4	23	UBERON:feces	UBERON:feces	UBERON:feces	24	Stricturing (B2)	Ileocolonic (L3)	yes	2009-08-11	CD	TRUE	urban biome	human-associated habitat	feces	human-gut	2009-08-11	Sweden	human	Homo sapiens	1629:211	9606	ICD_r	60.128	18.644	211	no	LBNL	FALSE	stool	human gut metagenome	male	IBD	1629	2	not applicable
1629.SubjectIBD145	TGTCCAGG	GTGCCAGCMGCCGCGGTAA	LBNL	Jansson_Lamendella_Crohns	Illumina HiSeq 2000	Illumina V4 515F/806RBC	GT	FWD:GTGCCAGCMGCCGCGGTAA; REV:GGACTACHVGGGTWTCTAAT	Illumina	Yale Center for Genome Analysis	868_L2_L006_R1_sequences	sequencing by synthesis	16S rRNA	V4	23	UBERON:feces	UBERON:feces	UBERON:feces	14.8	Stricturing (B2)	Ileocolonic (L3)	yes	2009-11-03	CD	TRUE	urban biome	human-associated habitat	feces	human-gut	2009-11-03	Sweden	human	Homo sapiens	1629:211	9606	ICD_r	60.128	18.644	211	no	LBNL	FALSE	stool	human gut metagenome	male	IBD	1629	3	not applicable
1629.SubjectIBD142	AGCCGAAT	GTGCCAGCMGCCGCGGTAA	LBNL	Jansson_Lamendella_Crohns	Illumina HiSeq 2000	Illumina V4 515F/806RBC	GT	FWD:GTGCCAGCMGCCGCGGTAA; REV:GGACTACHVGGGTWTCTAAT	Illumina	Yale Center for Genome Analysis	868_L4_L008_R1_sequences	sequencing by synthesis	16S rRNA	V4	23	UBERON:feces	UBERON:feces	UBERON:feces	11.6	Stricturing (B2)	Ileocolonic (L3)	yes	2011-02-03	CD	TRUE	urban biome	human-associated habitat	feces	human-gut	2011-02-03	Sweden	human	Homo sapiens	1629:211	9606	ICD_r	60.128	18.644	211	no	LBNL	FALSE	stool	human gut metagenome	male	IBD	1629	8	not applicable
1629.SubjectIBD143	GTCAAACT	GTGCCAGCMGCCGCGGTAA	LBNL	Jansson_Lamendella_Crohns	Illumina HiSeq 2000	Illumina V4 515F/806RBC	GT	FWD:GTGCCAGCMGCCGCGGTAA; REV:GGACTACHVGGGTWTCTAAT	Illumina	Yale Center for Genome Analysis	868_L1_L005_R1_sequences	sequencing by synthesis	16S rRNA	V4	23	UBERON:feces	UBERON:feces	UBERON:feces	68	Stricturing (B2)	Ileocolonic (L3)	yes	2009-05-12	CD	TRUE	urban biome	human-associated habitat	feces	human-gut	2009-05-12	Sweden	human	Homo sapiens	1629:211	9606	ICD_r	60.128	18.644	211	no	LBNL	FALSE	stool	human gut metagenome	male	IBD	1629	1	not applicable
1629.SubjectIBD140	CGCAATCG	GTGCCAGCMGCCGCGGTAA	LBNL	Jansson_Lamendella_Crohns	Illumina HiSeq 2000	Illumina V4 515F/806RBC	GT	FWD:GTGCCAGCMGCCGCGGTAA; REV:GGACTACHVGGGTWTCTAAT	Illumina	Yale Center for Genome Analysis	868_L1_L005_R1_sequences	sequencing by synthesis	16S rRNA	V4	23	UBERON:feces	UBERON:feces	UBERON:feces	not applicable	Stricturing (B2)	Ileocolonic (L3)	yes	2010-09-09	CD	TRUE	urban biome	human-associated habitat	feces	human-gut	2010-09-09	Sweden	human	Homo sapiens	1629:211	9606	ICD_r	60.128	18.644	211	no	LBNL	FALSE	stool	human gut metagenome	male	IBD	1629	6	not applicable
1629.SubjectIBD141	CAGATTTC	GTGCCAGCMGCCGCGGTAA	LBNL	Jansson_Lamendella_Crohns	Illumina HiSeq 2000	Illumina V4 515F/806RBC	GT	FWD:GTGCCAGCMGCCGCGGTAA; REV:GGACTACHVGGGTWTCTAAT	Illumina	Yale Center for Genome Analysis	868_L2_L006_R1_sequences	sequencing by synthesis	16S rRNA	V4	23	UBERON:feces	UBERON:feces	UBERON:feces	10.9	Stricturing (B2)	Ileocolonic (L3)	yes	2010-11-10	CD	TRUE	urban biome	human-associated habitat	feces	human-gut	2010-11-10	Sweden	human	Homo sapiens	1629:211	9606	ICD_r	60.128	18.644	211	no	LBNL	FALSE	stool	human gut metagenome	male	IBD	1629	7	not applicable
1629.SubjectIBD550	TCTGCTAG	GTGCCAGCMGCCGCGGTAA	LBNL	Jansson_Lamendella_Crohns	Illumina HiSeq 2000	Illumina V4 515F/806RBC	GT	FWD:GTGCCAGCMGCCGCGGTAA; REV:GGACTACHVGGGTWTCTAAT	Illumina	Yale Center for Genome Analysis	868_L1_L005_R1_sequences	sequencing by synthesis	16S rRNA	V4	30	UBERON:feces	UBERON:feces	UBERON:feces	1538	Non-stricturing, non-penetrating (B1)	Ileocolonic (L3)	no	2009-03-17	CD	TRUE	urban biome	human-associated habitat	feces	human-gut	2009-03-17	Sweden	human	Homo sapiens	1629:913	9606	ICD_nr	60.128	18.644	913	no	LBNL	FALSE	stool	human gut metagenome	female	IBD	1629	1	not applicable
1629.SubjectIBD487	GTTGACGA	GTGCCAGCMGCCGCGGTAA	LBNL	Jansson_Lamendella_Crohns	Illumina HiSeq 2000	Illumina V4 515F/806RBC	GT	FWD:GTGCCAGCMGCCGCGGTAA; REV:GGACTACHVGGGTWTCTAAT	Illumina	Yale Center for Genome Analysis	868_L2_L006_R1_sequences	sequencing by synthesis	16S rRNA	V4	25	UBERON:feces	UBERON:feces	UBERON:feces	61	not applicable	not applicable	not applicable	2009-09-15	HC	TRUE	urban biome	human-associated habitat	feces	human-gut	2009-09-15	Sweden	human	Homo sapiens	1629:882	9606	HC	60.128	18.644	882	not applicable	LBNL	FALSE	stool	human gut metagenome	male	IBD	1629	2	not applicable
1629.SubjectIBD486	GAGCCTTA	GTGCCAGCMGCCGCGGTAA	LBNL	Jansson_Lamendella_Crohns	Illumina HiSeq 2000	Illumina V4 515F/806RBC	GT	FWD:GTGCCAGCMGCCGCGGTAA; REV:GGACTACHVGGGTWTCTAAT	Illumina	Yale Center for Genome Analysis	868_L2_L006_R1_sequences	sequencing by synthesis	16S rRNA	V4	25	UBERON:feces	UBERON:feces	UBERON:feces	43	not applicable	not applicable	not applicable	2009-06-23	HC	TRUE	urban biome	human-associated habitat	feces	human-gut	2009-06-23	Sweden	human	Homo sapiens	1629:882	9606	HC	60.128	18.644	882	not applicable	LBNL	FALSE	stool	human gut metagenome	male	IBD	1629	1	not applicable
1629.SubjectIBD485	TTGTAGCC	GTGCCAGCMGCCGCGGTAA	LBNL	Jansson_Lamendella_Crohns	Illumina HiSeq 2000	Illumina V4 515F/806RBC	GT	FWD:GTGCCAGCMGCCGCGGTAA; REV:GGACTACHVGGGTWTCTAAT	Illumina	Yale Center for Genome Analysis	868_L4_L008_R1_sequences	sequencing by synthesis	16S rRNA	V4	25	UBERON:feces	UBERON:feces	UBERON:feces	229	not applicable	not applicable	not applicable	2011-03-16	HC	TRUE	urban biome	human-associated habitat	feces	human-gut	2011-03-16	Sweden	human	Homo sapiens	1629:882	9606	HC	60.128	18.644	882	not applicable	LBNL	FALSE	stool	human gut metagenome	male	IBD	1629	8	not applicable
1629.SubjectIBD484	GTCGCTGT	GTGCCAGCMGCCGCGGTAA	LBNL	Jansson_Lamendella_Crohns	Illumina HiSeq 2000	Illumina V4 515F/806RBC	GT	FWD:GTGCCAGCMGCCGCGGTAA; REV:GGACTACHVGGGTWTCTAAT	Illumina	Yale Center for Genome Analysis	868_L4_L008_R1_sequences	sequencing by synthesis	16S rRNA	V4	25	UBERON:feces	UBERON:feces	UBERON:feces	69	not applicable	not applicable	not applicable	2010-12-15	HC	TRUE	urban biome	human-associated habitat	feces	human-gut	2010-12-15	Sweden	human	Homo sapiens	1629:882	9606	HC	60.128	18.644	882	not applicable	LBNL	FALSE	stool	human gut metagenome	male	IBD	1629	7	not applicable
1629.SubjectIBD483	TACAAACC	GTGCCAGCMGCCGCGGTAA	LBNL	Jansson_Lamendella_Crohns	Illumina HiSeq 2000	Illumina V4 515F/806RBC	GT	FWD:GTGCCAGCMGCCGCGGTAA; REV:GGACTACHVGGGTWTCTAAT	Illumina	Yale Center for Genome Analysis	868_L3_L007_R1_sequences	sequencing by synthesis	16S rRNA	V4	25	UBERON:feces	UBERON:feces	UBERON:feces	147	not applicable	not applicable	not applicable	2010-09-16	HC	TRUE	urban biome	human-associated habitat	feces	human-gut	2010-09-16	Sweden	human	Homo sapiens	1629:882	9606	HC	60.128	18.644	882	not applicable	LBNL	FALSE	stool	human gut metagenome	male	IBD	1629	6	not applicable
1629.SubjectIBD482	GCACCCAA	GTGCCAGCMGCCGCGGTAA	LBNL	Jansson_Lamendella_Crohns	Illumina HiSeq 2000	Illumina V4 515F/806RBC	GT	FWD:GTGCCAGCMGCCGCGGTAA; REV:GGACTACHVGGGTWTCTAAT	Illumina	Yale Center for Genome Analysis	868_L2_L006_R1_sequences	sequencing by synthesis	16S rRNA	V4	25	UBERON:feces	UBERON:feces	UBERON:feces	64	not applicable	not applicable	not applicable	2010-07-06	HC	TRUE	urban biome	human-associated habitat	feces	human-gut	2010-07-06	Sweden	human	Homo sapiens	1629:882	9606	HC	60.128	18.644	882	not applicable	LBNL	FALSE	stool	human gut metagenome	male	IBD	1629	5	not applicable
1629.SubjectIBD481	TGTCAAGT	GTGCCAGCMGCCGCGGTAA	LBNL	Jansson_Lamendella_Crohns	Illumina HiSeq 2000	Illumina V4 515F/806RBC	GT	FWD:GTGCCAGCMGCCGCGGTAA; REV:GGACTACHVGGGTWTCTAAT	Illumina	Yale Center for Genome Analysis	868_L1_L005_R1_sequences	sequencing by synthesis	16S rRNA	V4	25	UBERON:feces	UBERON:feces	UBERON:feces	69	not applicable	not applicable	not applicable	2010-03-30	HC	TRUE	urban biome	human-associated habitat	feces	human-gut	2010-03-30	Sweden	human	Homo sapiens	1629:882	9606	HC	60.128	18.644	882	not applicable	LBNL	FALSE	stool	human gut metagenome	male	IBD	1629	4	not applicable
1629.SubjectIBD257	ATCCCTTG	GTGCCAGCMGCCGCGGTAA	LBNL	Jansson_Lamendella_Crohns	Illumina HiSeq 2000	Illumina V4 515F/806RBC	GT	FWD:GTGCCAGCMGCCGCGGTAA; REV:GGACTACHVGGGTWTCTAAT	Illumina	Yale Center for Genome Analysis	868_L1_L005_R1_sequences	sequencing by synthesis	16S rRNA	V4	38	UBERON:feces	UBERON:feces	UBERON:feces	561	Stricturing (B2)	Ileal (L1)	yes	2010-06-10	CD	TRUE	urban biome	human-associated habitat	feces	human-gut	2010-06-10	Sweden	human	Homo sapiens	1629:416	9606	ICD_r	60.128	18.644	416	no	LBNL	FALSE	stool	human gut metagenome	male	IBD	1629	3	not applicable
1629.SubjectIBD489	CATATACT	GTGCCAGCMGCCGCGGTAA	LBNL	Jansson_Lamendella_Crohns	Illumina HiSeq 2000	Illumina V4 515F/806RBC	GT	FWD:GTGCCAGCMGCCGCGGTAA; REV:GGACTACHVGGGTWTCTAAT	Illumina	Yale Center for Genome Analysis	868_L2_L006_R1_sequences	sequencing by synthesis	16S rRNA	V4	26	UBERON:feces	UBERON:feces	UBERON:feces	21	Non-stricturing, non-penetrating (B1)	Colonic (L2)	no	2010-03-25	CD	TRUE	urban biome	human-associated habitat	feces	human-gut	2010-03-25	Sweden	human	Homo sapiens	1629:884	9606	CCD	60.128	18.644	884	no	LBNL	FALSE	stool	human gut metagenome	male	IBD	1629	4	not applicable
1629.SubjectIBD488	GAAAGCGA	GTGCCAGCMGCCGCGGTAA	LBNL	Jansson_Lamendella_Crohns	Illumina HiSeq 2000	Illumina V4 515F/806RBC	GT	FWD:GTGCCAGCMGCCGCGGTAA; REV:GGACTACHVGGGTWTCTAAT	Illumina	Yale Center for Genome Analysis	868_L2_L006_R1_sequences	sequencing by synthesis	16S rRNA	V4	25	UBERON:feces	UBERON:feces	UBERON:feces	120	not applicable	not applicable	not applicable	2009-12-17	HC	TRUE	urban biome	human-associated habitat	feces	human-gut	2009-12-17	Sweden	human	Homo sapiens	1629:882	9606	HC	60.128	18.644	882	not applicable	LBNL	FALSE	stool	human gut metagenome	male	IBD	1629	3	not applicable
1629.SubjectIBD245	AGGATCCG	GTGCCAGCMGCCGCGGTAA	LBNL	Jansson_Lamendella_Crohns	Illumina HiSeq 2000	Illumina V4 515F/806RBC	GT	FWD:GTGCCAGCMGCCGCGGTAA; REV:GGACTACHVGGGTWTCTAAT	Illumina	Yale Center for Genome Analysis	868_L4_L008_R1_sequences	sequencing by synthesis	16S rRNA	V4	28	UBERON:feces	UBERON:feces	UBERON:feces	552	Stricturing (B2)	Ileal (L1)	yes	2010-12-15	CD	TRUE	urban biome	human-associated habitat	feces	human-gut	2010-12-15	Sweden	human	Homo sapiens	1629:390	9606	ICD_r	60.128	18.644	390	yes	LBNL	FALSE	stool	human gut metagenome	male	IBD	1629	5	not applicable
1629.SubjectIBD244	AGAGCGCC	GTGCCAGCMGCCGCGGTAA	LBNL	Jansson_Lamendella_Crohns	Illumina HiSeq 2000	Illumina V4 515F/806RBC	GT	FWD:GTGCCAGCMGCCGCGGTAA; REV:GGACTACHVGGGTWTCTAAT	Illumina	Yale Center for Genome Analysis	868_L1_L005_R1_sequences	sequencing by synthesis	16S rRNA	V4	28	UBERON:feces	UBERON:feces	UBERON:feces	41	Stricturing (B2)	Ileal (L1)	yes	2010-10-05	CD	TRUE	urban biome	human-associated habitat	feces	human-gut	2010-10-05	Sweden	human	Homo sapiens	1629:390	9606	ICD_r	60.128	18.644	390	yes	LBNL	FALSE	stool	human gut metagenome	male	IBD	1629	4	not applicable
1629.SubjectIBD247	CTTGATGC	GTGCCAGCMGCCGCGGTAA	LBNL	Jansson_Lamendella_Crohns	Illumina HiSeq 2000	Illumina V4 515F/806RBC	GT	FWD:GTGCCAGCMGCCGCGGTAA; REV:GGACTACHVGGGTWTCTAAT	Illumina	Yale Center for Genome Analysis	868_L2_L006_R1_sequences	sequencing by synthesis	16S rRNA	V4	26	UBERON:feces	UBERON:feces	UBERON:feces	231	Stricturing (B2)	Ileal (L1)	yes	2009-12-22	CD	TRUE	urban biome	human-associated habitat	feces	human-gut	2009-12-22	Sweden	human	Homo sapiens	1629:390	9606	ICD_r	60.128	18.644	390	yes	LBNL	FALSE	stool	human gut metagenome	male	IBD	1629	1	not applicable
1629.SubjectIBD246	GCACCCAA	GTGCCAGCMGCCGCGGTAA	LBNL	Jansson_Lamendella_Crohns	Illumina HiSeq 2000	Illumina V4 515F/806RBC	GT	FWD:GTGCCAGCMGCCGCGGTAA; REV:GGACTACHVGGGTWTCTAAT	Illumina	Yale Center for Genome Analysis	868_L4_L008_R1_sequences	sequencing by synthesis	16S rRNA	V4	28	UBERON:feces	UBERON:feces	UBERON:feces	72	Stricturing (B2)	Ileal (L1)	yes	2011-04-06	CD	TRUE	urban biome	human-associated habitat	feces	human-gut	2011-04-06	Sweden	human	Homo sapiens	1629:390	9606	ICD_r	60.128	18.644	390	yes	LBNL	FALSE	stool	human gut metagenome	male	IBD	1629	6	not applicable
1629.SubjectIBD243	CCTTTCTT	GTGCCAGCMGCCGCGGTAA	LBNL	Jansson_Lamendella_Crohns	Illumina HiSeq 2000	Illumina V4 515F/806RBC	GT	FWD:GTGCCAGCMGCCGCGGTAA; REV:GGACTACHVGGGTWTCTAAT	Illumina	Yale Center for Genome Analysis	868_L2_L006_R1_sequences	sequencing by synthesis	16S rRNA	V4	26	UBERON:feces	UBERON:feces	UBERON:feces	109	Stricturing (B2)	Ileal (L1)	yes	2010-07-17	CD	TRUE	urban biome	human-associated habitat	feces	human-gut	2010-07-17	Sweden	human	Homo sapiens	1629:390	9606	ICD_r	60.128	18.644	390	yes	LBNL	FALSE	stool	human gut metagenome	male	IBD	1629	3	not applicable
1629.SubjectIBD242	TCCGGTTC	GTGCCAGCMGCCGCGGTAA	LBNL	Jansson_Lamendella_Crohns	Illumina HiSeq 2000	Illumina V4 515F/806RBC	GT	FWD:GTGCCAGCMGCCGCGGTAA; REV:GGACTACHVGGGTWTCTAAT	Illumina	Yale Center for Genome Analysis	868_L2_L006_R1_sequences	sequencing by synthesis	16S rRNA	V4	26	UBERON:feces	UBERON:feces	UBERON:feces	157	Stricturing (B2)	Ileal (L1)	yes	2010-03-30	CD	TRUE	urban biome	human-associated habitat	feces	human-gut	2010-03-30	Sweden	human	Homo sapiens	1629:390	9606	ICD_r	60.128	18.644	390	yes	LBNL	FALSE	stool	human gut metagenome	male	IBD	1629	2	not applicable
1629.SubjectIBD248	GAGTCAAC	GTGCCAGCMGCCGCGGTAA	LBNL	Jansson_Lamendella_Crohns	Illumina HiSeq 2000	Illumina V4 515F/806RBC	GT	FWD:GTGCCAGCMGCCGCGGTAA; REV:GGACTACHVGGGTWTCTAAT	Illumina	Yale Center for Genome Analysis	868_L4_L008_R1_sequences	sequencing by synthesis	16S rRNA	V4	27	UBERON:feces	UBERON:feces	UBERON:feces	827	Non-stricturing, non-penetrating (B1)	Colonic (L2)	no	2010-02-25	CD	TRUE	urban biome	human-associated habitat	feces	human-gut	2010-02-25	Sweden	human	Homo sapiens	1629:413	9606	CCD	60.128	18.644	413	no	LBNL	FALSE	stool	human gut metagenome	male	IBD	1629	4	not applicable
1629.SubjectIBD399	TGAACTGC	GTGCCAGCMGCCGCGGTAA	LBNL	Jansson_Lamendella_Crohns	Illumina HiSeq 2000	Illumina V4 515F/806RBC	GT	FWD:GTGCCAGCMGCCGCGGTAA; REV:GGACTACHVGGGTWTCTAAT	Illumina	Yale Center for Genome Analysis	868_L1_L005_R1_sequences	sequencing by synthesis	16S rRNA	V4	18	UBERON:feces	UBERON:feces	UBERON:feces	879	Non-stricturing, non-penetrating (B1)	Colonic (L2)	no	2009-06-10	CD	TRUE	urban biome	human-associated habitat	feces	human-gut	2009-06-10	Sweden	human	Homo sapiens	1629:680	9606	CCD	60.128	18.644	680	no	LBNL	FALSE	stool	human gut metagenome	female	IBD	1629	1	not applicable
1629.SubjectIBD398	ACGCATTG	GTGCCAGCMGCCGCGGTAA	LBNL	Jansson_Lamendella_Crohns	Illumina HiSeq 2000	Illumina V4 515F/806RBC	GT	FWD:GTGCCAGCMGCCGCGGTAA; REV:GGACTACHVGGGTWTCTAAT	Illumina	Yale Center for Genome Analysis	868_L4_L008_R1_sequences	sequencing by synthesis	16S rRNA	V4	18	UBERON:feces	UBERON:feces	UBERON:feces	443	Non-stricturing, non-penetrating (B1)	Colonic (L2)	no	2011-03-22	CD	TRUE	urban biome	human-associated habitat	feces	human-gut	2011-03-22	Sweden	human	Homo sapiens	1629:680	9606	CCD	60.128	18.644	680	no	LBNL	FALSE	stool	human gut metagenome	female	IBD	1629	7	not applicable
1629.SubjectIBD522	TGCTCAGT	GTGCCAGCMGCCGCGGTAA	LBNL	Jansson_Lamendella_Crohns	Illumina HiSeq 2000	Illumina V4 515F/806RBC	GT	FWD:GTGCCAGCMGCCGCGGTAA; REV:GGACTACHVGGGTWTCTAAT	Illumina	Yale Center for Genome Analysis	868_L1_L005_R1_sequences	sequencing by synthesis	16S rRNA	V4	20	UBERON:feces	UBERON:feces	UBERON:feces	not applicable	not applicable	not applicable	not applicable	2010-01-14	HC	TRUE	urban biome	human-associated habitat	feces	human-gut	2010-01-14	Sweden	human	Homo sapiens	1629:901	9606	HC	60.128	18.644	901	not applicable	LBNL	FALSE	stool	human gut metagenome	female	IBD	1629	2	not applicable
1629.SubjectIBD344	GGTAATCC	GTGCCAGCMGCCGCGGTAA	LBNL	Jansson_Lamendella_Crohns	Illumina HiSeq 2000	Illumina V4 515F/806RBC	GT	FWD:GTGCCAGCMGCCGCGGTAA; REV:GGACTACHVGGGTWTCTAAT	Illumina	Yale Center for Genome Analysis	868_L2_L006_R1_sequences	sequencing by synthesis	16S rRNA	V4	31	UBERON:feces	UBERON:feces	UBERON:feces	276	Non-stricturing, non-penetrating (B1)	Colonic (L2)	no	2010-08-03	CD	TRUE	urban biome	human-associated habitat	feces	human-gut	2010-08-03	Sweden	human	Homo sapiens	1629:560	9606	CCD	60.128	18.644	560	no	LBNL	FALSE	stool	human gut metagenome	male	IBD	1629	2	not applicable
1629.SubjectIBD345	TTCAACAG	GTGCCAGCMGCCGCGGTAA	LBNL	Jansson_Lamendella_Crohns	Illumina HiSeq 2000	Illumina V4 515F/806RBC	GT	FWD:GTGCCAGCMGCCGCGGTAA; REV:GGACTACHVGGGTWTCTAAT	Illumina	Yale Center for Genome Analysis	868_L2_L006_R1_sequences	sequencing by synthesis	16S rRNA	V4	27	UBERON:feces	UBERON:feces	UBERON:feces	898	Non-stricturing, non-penetrating (B1)	Colonic (L2)	no	2010-03-03	CD	TRUE	urban biome	human-associated habitat	feces	human-gut	2010-03-03	Sweden	human	Homo sapiens	1629:564	9606	CCD	60.128	18.644	564	no	LBNL	FALSE	stool	human gut metagenome	male	IBD	1629	5	not applicable
1629.SubjectIBD346	CTATCGTA	GTGCCAGCMGCCGCGGTAA	LBNL	Jansson_Lamendella_Crohns	Illumina HiSeq 2000	Illumina V4 515F/806RBC	GT	FWD:GTGCCAGCMGCCGCGGTAA; REV:GGACTACHVGGGTWTCTAAT	Illumina	Yale Center for Genome Analysis	868_L1_L005_R1_sequences	sequencing by synthesis	16S rRNA	V4	27	UBERON:feces	UBERON:feces	UBERON:feces	1032	Non-stricturing, non-penetrating (B1)	Colonic (L2)	no	2009-07-14	CD	TRUE	urban biome	human-associated habitat	feces	human-gut	2009-07-14	Sweden	human	Homo sapiens	1629:564	9606	CCD	60.128	18.644	564	no	LBNL	FALSE	stool	human gut metagenome	male	IBD	1629	1	not applicable
1629.SubjectIBD347	AGCCGAAT	GTGCCAGCMGCCGCGGTAA	LBNL	Jansson_Lamendella_Crohns	Illumina HiSeq 2000	Illumina V4 515F/806RBC	GT	FWD:GTGCCAGCMGCCGCGGTAA; REV:GGACTACHVGGGTWTCTAAT	Illumina	Yale Center for Genome Analysis	868_L2_L006_R1_sequences	sequencing by synthesis	16S rRNA	V4	27	UBERON:feces	UBERON:feces	UBERON:feces	1986	Non-stricturing, non-penetrating (B1)	Colonic (L2)	no	2009-09-23	CD	TRUE	urban biome	human-associated habitat	feces	human-gut	2009-09-23	Sweden	human	Homo sapiens	1629:564	9606	CCD	60.128	18.644	564	no	LBNL	FALSE	stool	human gut metagenome	male	IBD	1629	2	not applicable
1629.SubjectIBD340	TCTCGAGC	GTGCCAGCMGCCGCGGTAA	LBNL	Jansson_Lamendella_Crohns	Illumina HiSeq 2000	Illumina V4 515F/806RBC	GT	FWD:GTGCCAGCMGCCGCGGTAA; REV:GGACTACHVGGGTWTCTAAT	Illumina	Yale Center for Genome Analysis	868_L1_L005_R1_sequences	sequencing by synthesis	16S rRNA	V4	29	UBERON:feces	UBERON:feces	UBERON:feces	191	Penetrating (B3)	Ileocolonic (L3)	yes	2010-09-30	CD	TRUE	urban biome	human-associated habitat	feces	human-gut	2010-09-30	Sweden	human	Homo sapiens	1629:553	9606	ICD_r	60.128	18.644	553	no	LBNL	FALSE	stool	human gut metagenome	female	IBD	1629	6	not applicable
1629.SubjectIBD342	GACTGTCA	GTGCCAGCMGCCGCGGTAA	LBNL	Jansson_Lamendella_Crohns	Illumina HiSeq 2000	Illumina V4 515F/806RBC	GT	FWD:GTGCCAGCMGCCGCGGTAA; REV:GGACTACHVGGGTWTCTAAT	Illumina	Yale Center for Genome Analysis	868_L1_L005_R1_sequences	sequencing by synthesis	16S rRNA	V4	29	UBERON:feces	UBERON:feces	UBERON:feces	176	Penetrating (B3)	Ileocolonic (L3)	yes	2009-07-28	CD	TRUE	urban biome	human-associated habitat	feces	human-gut	2009-07-28	Sweden	human	Homo sapiens	1629:553	9606	ICD_r	60.128	18.644	553	no	LBNL	FALSE	stool	human gut metagenome	female	IBD	1629	2	not applicable
1629.SubjectIBD343	TGGCTCTA	GTGCCAGCMGCCGCGGTAA	LBNL	Jansson_Lamendella_Crohns	Illumina HiSeq 2000	Illumina V4 515F/806RBC	GT	FWD:GTGCCAGCMGCCGCGGTAA; REV:GGACTACHVGGGTWTCTAAT	Illumina	Yale Center for Genome Analysis	868_L4_L008_R1_sequences	sequencing by synthesis	16S rRNA	V4	31	UBERON:feces	UBERON:feces	UBERON:feces	2270	Non-stricturing, non-penetrating (B1)	Colonic (L2)	no	2010-03-25	CD	TRUE	urban biome	human-associated habitat	feces	human-gut	2010-03-25	Sweden	human	Homo sapiens	1629:560	9606	CCD	60.128	18.644	560	no	LBNL	FALSE	stool	human gut metagenome	male	IBD	1629	1	not applicable
1629.SubjectIBD065	GGAGTCGG	GTGCCAGCMGCCGCGGTAA	LBNL	Jansson_Lamendella_Crohns	Illumina HiSeq 2000	Illumina V4 515F/806RBC	GT	FWD:GTGCCAGCMGCCGCGGTAA; REV:GGACTACHVGGGTWTCTAAT	Illumina	Yale Center for Genome Analysis	868_L4_L008_R1_sequences	sequencing by synthesis	16S rRNA	V4	22	UBERON:feces	UBERON:feces	UBERON:feces	75	Stricturing (B2)	Ileal (L1)	yes	2011-02-24	CD	TRUE	urban biome	human-associated habitat	feces	human-gut	2011-02-24	Sweden	human	Homo sapiens	1629:129	9606	ICD_r	60.128	18.644	129	no	LBNL	FALSE	stool	human gut metagenome	female	IBD	1629	4	not applicable
1629.SubjectIBD064	CCACTAAT	GTGCCAGCMGCCGCGGTAA	LBNL	Jansson_Lamendella_Crohns	Illumina HiSeq 2000	Illumina V4 515F/806RBC	GT	FWD:GTGCCAGCMGCCGCGGTAA; REV:GGACTACHVGGGTWTCTAAT	Illumina	Yale Center for Genome Analysis	868_L2_L006_R1_sequences	sequencing by synthesis	16S rRNA	V4	22	UBERON:feces	UBERON:feces	UBERON:feces	42	Stricturing (B2)	Ileal (L1)	yes	2010-11-30	CD	TRUE	urban biome	human-associated habitat	feces	human-gut	2010-11-30	Sweden	human	Homo sapiens	1629:129	9606	ICD_r	60.128	18.644	129	no	LBNL	FALSE	stool	human gut metagenome	female	IBD	1629	3	not applicable
1629.SubjectIBD063	TCCTCCTA	GTGCCAGCMGCCGCGGTAA	LBNL	Jansson_Lamendella_Crohns	Illumina HiSeq 2000	Illumina V4 515F/806RBC	GT	FWD:GTGCCAGCMGCCGCGGTAA; REV:GGACTACHVGGGTWTCTAAT	Illumina	Yale Center for Genome Analysis	868_L2_L006_R1_sequences	sequencing by synthesis	16S rRNA	V4	22	UBERON:feces	UBERON:feces	UBERON:feces	67	Stricturing (B2)	Ileal (L1)	yes	2010-08-24	CD	TRUE	urban biome	human-associated habitat	feces	human-gut	2010-08-24	Sweden	human	Homo sapiens	1629:129	9606	ICD_r	60.128	18.644	129	no	LBNL	FALSE	stool	human gut metagenome	female	IBD	1629	2	not applicable
1629.SubjectIBD062	AACCGTTC	GTGCCAGCMGCCGCGGTAA	LBNL	Jansson_Lamendella_Crohns	Illumina HiSeq 2000	Illumina V4 515F/806RBC	GT	FWD:GTGCCAGCMGCCGCGGTAA; REV:GGACTACHVGGGTWTCTAAT	Illumina	Yale Center for Genome Analysis	868_L2_L006_R1_sequences	sequencing by synthesis	16S rRNA	V4	22	UBERON:feces	UBERON:feces	UBERON:feces	57	Stricturing (B2)	Ileal (L1)	yes	2010-05-18	CD	TRUE	urban biome	human-associated habitat	feces	human-gut	2010-05-18	Sweden	human	Homo sapiens	1629:129	9606	ICD_r	60.128	18.644	129	no	LBNL	FALSE	stool	human gut metagenome	female	IBD	1629	1	not applicable
1629.SubjectIBD391	CGATGTCG	GTGCCAGCMGCCGCGGTAA	LBNL	Jansson_Lamendella_Crohns	Illumina HiSeq 2000	Illumina V4 515F/806RBC	GT	FWD:GTGCCAGCMGCCGCGGTAA; REV:GGACTACHVGGGTWTCTAAT	Illumina	Yale Center for Genome Analysis	868_L4_L008_R1_sequences	sequencing by synthesis	16S rRNA	V4	21	UBERON:feces	UBERON:feces	UBERON:feces	426	Stricturing (B2)	Ileal (L1)	yes	2010-06-14	CD	TRUE	urban biome	human-associated habitat	feces	human-gut	2010-06-14	Sweden	human	Homo sapiens	1629:671	9606	ICD_r	60.128	18.644	671	yes	LBNL	FALSE	stool	human gut metagenome	male	IBD	1629	2	not applicable
1629.SubjectIBD551	CCACTTGG	GTGCCAGCMGCCGCGGTAA	LBNL	Jansson_Lamendella_Crohns	Illumina HiSeq 2000	Illumina V4 515F/806RBC	GT	FWD:GTGCCAGCMGCCGCGGTAA; REV:GGACTACHVGGGTWTCTAAT	Illumina	Yale Center for Genome Analysis	868_L1_L005_R1_sequences	sequencing by synthesis	16S rRNA	V4	30	UBERON:feces	UBERON:feces	UBERON:feces	730	Non-stricturing, non-penetrating (B1)	Ileocolonic (L3)	no	2024-09-03	CD	TRUE	urban biome	human-associated habitat	feces	human-gut	2024-09-03	Sweden	human	Homo sapiens	1629:913	9606	ICD_nr	60.128	18.644	913	no	LBNL	FALSE	stool	human gut metagenome	female	IBD	1629	2	not applicable
1629.SubjectIBD259	GCTCGCTA	GTGCCAGCMGCCGCGGTAA	LBNL	Jansson_Lamendella_Crohns	Illumina HiSeq 2000	Illumina V4 515F/806RBC	GT	FWD:GTGCCAGCMGCCGCGGTAA; REV:GGACTACHVGGGTWTCTAAT	Illumina	Yale Center for Genome Analysis	868_L4_L008_R1_sequences	sequencing by synthesis	16S rRNA	V4	38	UBERON:feces	UBERON:feces	UBERON:feces	482	Stricturing (B2)	Ileal (L1)	yes	2011-03-01	CD	TRUE	urban biome	human-associated habitat	feces	human-gut	2011-03-01	Sweden	human	Homo sapiens	1629:416	9606	ICD_r	60.128	18.644	416	no	LBNL	FALSE	stool	human gut metagenome	male	IBD	1629	6	not applicable
1629.SubjectIBD027	AGCGACTG	GTGCCAGCMGCCGCGGTAA	LBNL	Jansson_Lamendella_Crohns	Illumina HiSeq 2000	Illumina V4 515F/806RBC	GT	FWD:GTGCCAGCMGCCGCGGTAA; REV:GGACTACHVGGGTWTCTAAT	Illumina	Yale Center for Genome Analysis	868_L1_L005_R1_sequences	sequencing by synthesis	16S rRNA	V4	31	UBERON:feces	UBERON:feces	UBERON:feces	259	Stricturing (B2)	Ileal (L1)	yes	2009-03-26	CD	TRUE	urban biome	human-associated habitat	feces	human-gut	2009-03-26	Sweden	human	Homo sapiens	1629:69	9606	ICD_r	60.128	18.644	69	no	LBNL	FALSE	stool	human gut metagenome	male	IBD	1629	1	not applicable
1629.SubjectIBD026	TATGGCAC	GTGCCAGCMGCCGCGGTAA	LBNL	Jansson_Lamendella_Crohns	Illumina HiSeq 2000	Illumina V4 515F/806RBC	GT	FWD:GTGCCAGCMGCCGCGGTAA; REV:GGACTACHVGGGTWTCTAAT	Illumina	Yale Center for Genome Analysis	868_L4_L008_R1_sequences	sequencing by synthesis	16S rRNA	V4	31	UBERON:feces	UBERON:feces	UBERON:feces	161	Stricturing (B2)	Ileal (L1)	yes	2010-12-08	CD	TRUE	urban biome	human-associated habitat	feces	human-gut	2010-12-08	Sweden	human	Homo sapiens	1629:69	9606	ICD_r	60.128	18.644	69	no	LBNL	FALSE	stool	human gut metagenome	male	IBD	1629	8	not applicable
1629.SubjectIBD111	GTACCGTG	GTGCCAGCMGCCGCGGTAA	LBNL	Jansson_Lamendella_Crohns	Illumina HiSeq 2000	Illumina V4 515F/806RBC	GT	FWD:GTGCCAGCMGCCGCGGTAA; REV:GGACTACHVGGGTWTCTAAT	Illumina	Yale Center for Genome Analysis	868_L1_L005_R1_sequences	sequencing by synthesis	16S rRNA	V4	23	UBERON:feces	UBERON:feces	UBERON:feces	273	Stricturing (B2)	Ileal (L1)	yes	2009-09-30	CD	TRUE	urban biome	human-associated habitat	feces	human-gut	2009-09-30	Sweden	human	Homo sapiens	1629:190	9606	ICD_r	60.128	18.644	190	no	LBNL	FALSE	stool	human gut metagenome	female	IBD	1629	3	not applicable
1629.SubjectIBD110	CGTACTAG	GTGCCAGCMGCCGCGGTAA	LBNL	Jansson_Lamendella_Crohns	Illumina HiSeq 2000	Illumina V4 515F/806RBC	GT	FWD:GTGCCAGCMGCCGCGGTAA; REV:GGACTACHVGGGTWTCTAAT	Illumina	Yale Center for Genome Analysis	868_L1_L005_R1_sequences	sequencing by synthesis	16S rRNA	V4	23	UBERON:feces	UBERON:feces	UBERON:feces	217	Stricturing (B2)	Ileal (L1)	yes	2009-07-03	CD	TRUE	urban biome	human-associated habitat	feces	human-gut	2009-07-03	Sweden	human	Homo sapiens	1629:190	9606	ICD_r	60.128	18.644	190	no	LBNL	FALSE	stool	human gut metagenome	female	IBD	1629	2	not applicable
1629.SubjectIBD113	TACATCAC	GTGCCAGCMGCCGCGGTAA	LBNL	Jansson_Lamendella_Crohns	Illumina HiSeq 2000	Illumina V4 515F/806RBC	GT	FWD:GTGCCAGCMGCCGCGGTAA; REV:GGACTACHVGGGTWTCTAAT	Illumina	Yale Center for Genome Analysis	868_L1_L005_R1_sequences	sequencing by synthesis	16S rRNA	V4	18	UBERON:feces	UBERON:feces	UBERON:feces	655	Stricturing (B2)	Ileocolonic (L3)	yes	2010-04-14	CD	TRUE	urban biome	human-associated habitat	feces	human-gut	2010-04-14	Sweden	human	Homo sapiens	1629:191	9606	ICD_r	60.128	18.644	191	no	LBNL	FALSE	stool	human gut metagenome	female	IBD	1629	5	not applicable
1629.SubjectIBD112	TCGAGACG	GTGCCAGCMGCCGCGGTAA	LBNL	Jansson_Lamendella_Crohns	Illumina HiSeq 2000	Illumina V4 515F/806RBC	GT	FWD:GTGCCAGCMGCCGCGGTAA; REV:GGACTACHVGGGTWTCTAAT	Illumina	Yale Center for Genome Analysis	868_L1_L005_R1_sequences	sequencing by synthesis	16S rRNA	V4	18	UBERON:feces	UBERON:feces	UBERON:feces	766	Stricturing (B2)	Ileocolonic (L3)	yes	2010-01-15	CD	TRUE	urban biome	human-associated habitat	feces	human-gut	2010-01-15	Sweden	human	Homo sapiens	1629:191	9606	ICD_r	60.128	18.644	191	no	LBNL	FALSE	stool	human gut metagenome	female	IBD	1629	4	not applicable
1629.SubjectIBD115	ATGACTCA	GTGCCAGCMGCCGCGGTAA	LBNL	Jansson_Lamendella_Crohns	Illumina HiSeq 2000	Illumina V4 515F/806RBC	GT	FWD:GTGCCAGCMGCCGCGGTAA; REV:GGACTACHVGGGTWTCTAAT	Illumina	Yale Center for Genome Analysis	868_L2_L006_R1_sequences	sequencing by synthesis	16S rRNA	V4	18	UBERON:feces	UBERON:feces	UBERON:feces	654	Stricturing (B2)	Ileocolonic (L3)	yes	2011-01-12	CD	TRUE	urban biome	human-associated habitat	feces	human-gut	2011-01-12	Sweden	human	Homo sapiens	1629:191	9606	ICD_r	60.128	18.644	191	no	LBNL	FALSE	stool	human gut metagenome	female	IBD	1629	8	not applicable
1629.SubjectIBD114	CAGTAACG	GTGCCAGCMGCCGCGGTAA	LBNL	Jansson_Lamendella_Crohns	Illumina HiSeq 2000	Illumina V4 515F/806RBC	GT	FWD:GTGCCAGCMGCCGCGGTAA; REV:GGACTACHVGGGTWTCTAAT	Illumina	Yale Center for Genome Analysis	868_L2_L006_R1_sequences	sequencing by synthesis	16S rRNA	V4	18	UBERON:feces	UBERON:feces	UBERON:feces	427	Stricturing (B2)	Ileocolonic (L3)	yes	2010-07-15	CD	TRUE	urban biome	human-associated habitat	feces	human-gut	2010-07-15	Sweden	human	Homo sapiens	1629:191	9606	ICD_r	60.128	18.644	191	no	LBNL	FALSE	stool	human gut metagenome	female	IBD	1629	6	not applicable
1629.SubjectIBD117	GCCGCTTA	GTGCCAGCMGCCGCGGTAA	LBNL	Jansson_Lamendella_Crohns	Illumina HiSeq 2000	Illumina V4 515F/806RBC	GT	FWD:GTGCCAGCMGCCGCGGTAA; REV:GGACTACHVGGGTWTCTAAT	Illumina	Yale Center for Genome Analysis	868_L1_L005_R1_sequences	sequencing by synthesis	16S rRNA	V4	18	UBERON:feces	UBERON:feces	UBERON:feces	441	Stricturing (B2)	Ileocolonic (L3)	yes	2009-07-09	CD	TRUE	urban biome	human-associated habitat	feces	human-gut	2009-07-09	Sweden	human	Homo sapiens	1629:191	9606	ICD_r	60.128	18.644	191	no	LBNL	FALSE	stool	human gut metagenome	female	IBD	1629	2	not applicable
1629.SubjectIBD116	CTATAGTC	GTGCCAGCMGCCGCGGTAA	LBNL	Jansson_Lamendella_Crohns	Illumina HiSeq 2000	Illumina V4 515F/806RBC	GT	FWD:GTGCCAGCMGCCGCGGTAA; REV:GGACTACHVGGGTWTCTAAT	Illumina	Yale Center for Genome Analysis	868_L2_L006_R1_sequences	sequencing by synthesis	16S rRNA	V4	18	UBERON:feces	UBERON:feces	UBERON:feces	284	Stricturing (B2)	Ileocolonic (L3)	yes	2009-04-27	CD	TRUE	urban biome	human-associated habitat	feces	human-gut	2009-04-27	Sweden	human	Homo sapiens	1629:191	9606	ICD_r	60.128	18.644	191	no	LBNL	FALSE	stool	human gut metagenome	female	IBD	1629	1	not applicable
1629.SubjectIBD119	GGAGTCGG	GTGCCAGCMGCCGCGGTAA	LBNL	Jansson_Lamendella_Crohns	Illumina HiSeq 2000	Illumina V4 515F/806RBC	GT	FWD:GTGCCAGCMGCCGCGGTAA; REV:GGACTACHVGGGTWTCTAAT	Illumina	Yale Center for Genome Analysis	868_L2_L006_R1_sequences	sequencing by synthesis	16S rRNA	V4	22	UBERON:feces	UBERON:feces	UBERON:feces	96	Non-stricturing, non-penetrating (B1)	Colonic (L2)	no	2010-04-15	CD	TRUE	urban biome	human-associated habitat	feces	human-gut	2010-04-15	Sweden	human	Homo sapiens	1629:193	9606	CCD	60.128	18.644	193	no	LBNL	FALSE	stool	human gut metagenome	female	IBD	1629	4	not applicable
1629.SubjectIBD118	ATTCGGTT	GTGCCAGCMGCCGCGGTAA	LBNL	Jansson_Lamendella_Crohns	Illumina HiSeq 2000	Illumina V4 515F/806RBC	GT	FWD:GTGCCAGCMGCCGCGGTAA; REV:GGACTACHVGGGTWTCTAAT	Illumina	Yale Center for Genome Analysis	868_L1_L005_R1_sequences	sequencing by synthesis	16S rRNA	V4	18	UBERON:feces	UBERON:feces	UBERON:feces	565	Stricturing (B2)	Ileocolonic (L3)	yes	2009-10-15	CD	TRUE	urban biome	human-associated habitat	feces	human-gut	2009-10-15	Sweden	human	Homo sapiens	1629:191	9606	ICD_r	60.128	18.644	191	no	LBNL	FALSE	stool	human gut metagenome	female	IBD	1629	3	not applicable
1629.SubjectIBD030	AACAATGG	GTGCCAGCMGCCGCGGTAA	LBNL	Jansson_Lamendella_Crohns	Illumina HiSeq 2000	Illumina V4 515F/806RBC	GT	FWD:GTGCCAGCMGCCGCGGTAA; REV:GGACTACHVGGGTWTCTAAT	Illumina	Yale Center for Genome Analysis	868_L1_L005_R1_sequences	sequencing by synthesis	16S rRNA	V4	31	UBERON:feces	UBERON:feces	UBERON:feces	587	Stricturing (B2)	Ileal (L1)	yes	2009-12-10	CD	TRUE	urban biome	human-associated habitat	feces	human-gut	2009-12-10	Sweden	human	Homo sapiens	1629:69	9606	ICD_r	60.128	18.644	69	no	LBNL	FALSE	stool	human gut metagenome	male	IBD	1629	4	not applicable
1629.SubjectIBD188	TCGGTTGG	GTGCCAGCMGCCGCGGTAA	LBNL	Jansson_Lamendella_Crohns	Illumina HiSeq 2000	Illumina V4 515F/806RBC	GT	FWD:GTGCCAGCMGCCGCGGTAA; REV:GGACTACHVGGGTWTCTAAT	Illumina	Yale Center for Genome Analysis	868_L3_L007_R1_sequences	sequencing by synthesis	16S rRNA	V4	26	UBERON:feces	UBERON:feces	UBERON:feces	114	Penetrating (B3)	Colonic (L2)	no	2010-09-14	CD	TRUE	urban biome	human-associated habitat	feces	human-gut	2010-09-14	Sweden	human	Homo sapiens	1629:288	9606	CCD	60.128	18.644	288	yes	LBNL	FALSE	stool	human gut metagenome	male	IBD	1629	2	not applicable
1629.SubjectIBD189	GGTTTCAA	GTGCCAGCMGCCGCGGTAA	LBNL	Jansson_Lamendella_Crohns	Illumina HiSeq 2000	Illumina V4 515F/806RBC	GT	FWD:GTGCCAGCMGCCGCGGTAA; REV:GGACTACHVGGGTWTCTAAT	Illumina	Yale Center for Genome Analysis	868_L4_L008_R1_sequences	sequencing by synthesis	16S rRNA	V4	26	UBERON:feces	UBERON:feces	UBERON:feces	85	Penetrating (B3)	Colonic (L2)	no	2011-02-16	CD	TRUE	urban biome	human-associated habitat	feces	human-gut	2011-02-16	Sweden	human	Homo sapiens	1629:288	9606	CCD	60.128	18.644	288	yes	LBNL	FALSE	stool	human gut metagenome	male	IBD	1629	3	not applicable
1629.SubjectIBD187	GACAGCGT	GTGCCAGCMGCCGCGGTAA	LBNL	Jansson_Lamendella_Crohns	Illumina HiSeq 2000	Illumina V4 515F/806RBC	GT	FWD:GTGCCAGCMGCCGCGGTAA; REV:GGACTACHVGGGTWTCTAAT	Illumina	Yale Center for Genome Analysis	868_L2_L006_R1_sequences	sequencing by synthesis	16S rRNA	V4	26	UBERON:feces	UBERON:feces	UBERON:feces	171	Penetrating (B3)	Colonic (L2)	no	2010-05-20	CD	TRUE	urban biome	human-associated habitat	feces	human-gut	2010-05-20	Sweden	human	Homo sapiens	1629:288	9606	CCD	60.128	18.644	288	yes	LBNL	FALSE	stool	human gut metagenome	male	IBD	1629	1	not applicable
1629.SubjectIBD500	CCTGTATC	GTGCCAGCMGCCGCGGTAA	LBNL	Jansson_Lamendella_Crohns	Illumina HiSeq 2000	Illumina V4 515F/806RBC	GT	FWD:GTGCCAGCMGCCGCGGTAA; REV:GGACTACHVGGGTWTCTAAT	Illumina	Yale Center for Genome Analysis	868_L1_L005_R1_sequences	sequencing by synthesis	16S rRNA	V4	24	UBERON:feces	UBERON:feces	UBERON:feces	10.3	not applicable	not applicable	not applicable	2010-02-01	HC	TRUE	urban biome	human-associated habitat	feces	human-gut	2010-02-01	Sweden	human	Homo sapiens	1629:896	9606	HC	60.128	18.644	896	not applicable	LBNL	FALSE	stool	human gut metagenome	female	IBD	1629	1	not applicable
1629.SubjectIBD501	ATTCTAGC	GTGCCAGCMGCCGCGGTAA	LBNL	Jansson_Lamendella_Crohns	Illumina HiSeq 2000	Illumina V4 515F/806RBC	GT	FWD:GTGCCAGCMGCCGCGGTAA; REV:GGACTACHVGGGTWTCTAAT	Illumina	Yale Center for Genome Analysis	868_L1_L005_R1_sequences	sequencing by synthesis	16S rRNA	V4	24	UBERON:feces	UBERON:feces	UBERON:feces	16.6	not applicable	not applicable	not applicable	2010-04-12	HC	TRUE	urban biome	human-associated habitat	feces	human-gut	2010-04-12	Sweden	human	Homo sapiens	1629:896	9606	HC	60.128	18.644	896	not applicable	LBNL	FALSE	stool	human gut metagenome	female	IBD	1629	2	not applicable
1629.SubjectIBD326	AGAGGAGA	GTGCCAGCMGCCGCGGTAA	LBNL	Jansson_Lamendella_Crohns	Illumina HiSeq 2000	Illumina V4 515F/806RBC	GT	FWD:GTGCCAGCMGCCGCGGTAA; REV:GGACTACHVGGGTWTCTAAT	Illumina	Yale Center for Genome Analysis	868_L2_L006_R1_sequences	sequencing by synthesis	16S rRNA	V4	26	UBERON:feces	UBERON:feces	UBERON:feces	1029	Stricturing (B2)	Ileal (L1)	yes	2010-08-19	CD	TRUE	urban biome	human-associated habitat	feces	human-gut	2010-08-19	Sweden	human	Homo sapiens	1629:525	9606	ICD_r	60.128	18.644	525	no	LBNL	FALSE	stool	human gut metagenome	male	IBD	1629	4	not applicable
1629.SubjectIBD327	TATTACCG	GTGCCAGCMGCCGCGGTAA	LBNL	Jansson_Lamendella_Crohns	Illumina HiSeq 2000	Illumina V4 515F/806RBC	GT	FWD:GTGCCAGCMGCCGCGGTAA; REV:GGACTACHVGGGTWTCTAAT	Illumina	Yale Center for Genome Analysis	868_L2_L006_R1_sequences	sequencing by synthesis	16S rRNA	V4	26	UBERON:feces	UBERON:feces	UBERON:feces	1227	Stricturing (B2)	Ileal (L1)	yes	2010-12-20	CD	TRUE	urban biome	human-associated habitat	feces	human-gut	2010-12-20	Sweden	human	Homo sapiens	1629:525	9606	ICD_r	60.128	18.644	525	no	LBNL	FALSE	stool	human gut metagenome	male	IBD	1629	5	not applicable
1629.SubjectIBD508	GGTCGGTA	GTGCCAGCMGCCGCGGTAA	LBNL	Jansson_Lamendella_Crohns	Illumina HiSeq 2000	Illumina V4 515F/806RBC	GT	FWD:GTGCCAGCMGCCGCGGTAA; REV:GGACTACHVGGGTWTCTAAT	Illumina	Yale Center for Genome Analysis	868_L2_L006_R1_sequences	sequencing by synthesis	16S rRNA	V4	28	UBERON:feces	UBERON:feces	UBERON:feces	not applicable	not applicable	not applicable	not applicable	2010-03-24	HC	TRUE	urban biome	human-associated habitat	feces	human-gut	2010-03-24	Sweden	human	Homo sapiens	1629:898	9606	HC	60.128	18.644	898	not applicable	LBNL	FALSE	stool	human gut metagenome	male	IBD	1629	5	not applicable
1629.SubjectIBD509	TCTATCGG	GTGCCAGCMGCCGCGGTAA	LBNL	Jansson_Lamendella_Crohns	Illumina HiSeq 2000	Illumina V4 515F/806RBC	GT	FWD:GTGCCAGCMGCCGCGGTAA; REV:GGACTACHVGGGTWTCTAAT	Illumina	Yale Center for Genome Analysis	868_L2_L006_R1_sequences	sequencing by synthesis	16S rRNA	V4	28	UBERON:feces	UBERON:feces	UBERON:feces	25	not applicable	not applicable	not applicable	2010-07-12	HC	TRUE	urban biome	human-associated habitat	feces	human-gut	2010-07-12	Sweden	human	Homo sapiens	1629:898	9606	HC	60.128	18.644	898	not applicable	LBNL	FALSE	stool	human gut metagenome	male	IBD	1629	6	not applicable
1629.SubjectIBD442	TATGGCAC	GTGCCAGCMGCCGCGGTAA	LBNL	Jansson_Lamendella_Crohns	Illumina HiSeq 2000	Illumina V4 515F/806RBC	GT	FWD:GTGCCAGCMGCCGCGGTAA; REV:GGACTACHVGGGTWTCTAAT	Illumina	Yale Center for Genome Analysis	868_L2_L006_R1_sequences	sequencing by synthesis	16S rRNA	V4	27	UBERON:feces	UBERON:feces	UBERON:feces	75	Non-stricturing, non-penetrating (B1)	Colonic (L2)	no	2009-10-19	CD	TRUE	urban biome	human-associated habitat	feces	human-gut	2009-10-19	Sweden	human	Homo sapiens	1629:769	9606	CCD	60.128	18.644	769	no	LBNL	FALSE	stool	human gut metagenome	male	IBD	1629	2	not applicable
1629.SubjectIBD441	GGTTAACA	GTGCCAGCMGCCGCGGTAA	LBNL	Jansson_Lamendella_Crohns	Illumina HiSeq 2000	Illumina V4 515F/806RBC	GT	FWD:GTGCCAGCMGCCGCGGTAA; REV:GGACTACHVGGGTWTCTAAT	Illumina	Yale Center for Genome Analysis	868_L1_L005_R1_sequences	sequencing by synthesis	16S rRNA	V4	27	UBERON:feces	UBERON:feces	UBERON:feces	80	Non-stricturing, non-penetrating (B1)	Colonic (L2)	no	2009-07-24	CD	TRUE	urban biome	human-associated habitat	feces	human-gut	2009-07-24	Sweden	human	Homo sapiens	1629:769	9606	CCD	60.128	18.644	769	no	LBNL	FALSE	stool	human gut metagenome	male	IBD	1629	1	not applicable
1629.SubjectIBD435	TCTTGTCA	GTGCCAGCMGCCGCGGTAA	LBNL	Jansson_Lamendella_Crohns	Illumina HiSeq 2000	Illumina V4 515F/806RBC	GT	FWD:GTGCCAGCMGCCGCGGTAA; REV:GGACTACHVGGGTWTCTAAT	Illumina	Yale Center for Genome Analysis	868_L2_L006_R1_sequences	sequencing by synthesis	16S rRNA	V4	27	UBERON:feces	UBERON:feces	UBERON:feces	347	Non-stricturing, non-penetrating (B1)	Colonic (L2)	no	2010-01-20	CD	TRUE	urban biome	human-associated habitat	feces	human-gut	2010-01-20	Sweden	human	Homo sapiens	1629:769	9606	CCD	60.128	18.644	769	no	LBNL	FALSE	stool	human gut metagenome	male	IBD	1629	3	not applicable
1629.SubjectIBD520	GGTTAACA	GTGCCAGCMGCCGCGGTAA	LBNL	Jansson_Lamendella_Crohns	Illumina HiSeq 2000	Illumina V4 515F/806RBC	GT	FWD:GTGCCAGCMGCCGCGGTAA; REV:GGACTACHVGGGTWTCTAAT	Illumina	Yale Center for Genome Analysis	868_L2_L006_R1_sequences	sequencing by synthesis	16S rRNA	V4	24	UBERON:feces	UBERON:feces	UBERON:feces	284	not applicable	not applicable	not applicable	2009-06-24	HC	TRUE	urban biome	human-associated habitat	feces	human-gut	2009-06-24	Sweden	human	Homo sapiens	1629:900	9606	HC	60.128	18.644	900	not applicable	LBNL	FALSE	stool	human gut metagenome	female	IBD	1629	2	not applicable
1629.SubjectIBD521	CCTGTCAT	GTGCCAGCMGCCGCGGTAA	LBNL	Jansson_Lamendella_Crohns	Illumina HiSeq 2000	Illumina V4 515F/806RBC	GT	FWD:GTGCCAGCMGCCGCGGTAA; REV:GGACTACHVGGGTWTCTAAT	Illumina	Yale Center for Genome Analysis	868_L2_L006_R1_sequences	sequencing by synthesis	16S rRNA	V4	24	UBERON:feces	UBERON:feces	UBERON:feces	127	not applicable	not applicable	not applicable	2009-09-24	HC	TRUE	urban biome	human-associated habitat	feces	human-gut	2009-09-24	Sweden	human	Homo sapiens	1629:900	9606	HC	60.128	18.644	900	not applicable	LBNL	FALSE	stool	human gut metagenome	female	IBD	1629	3	not applicable
1629.SubjectIBD524	AGATTCGT	GTGCCAGCMGCCGCGGTAA	LBNL	Jansson_Lamendella_Crohns	Illumina HiSeq 2000	Illumina V4 515F/806RBC	GT	FWD:GTGCCAGCMGCCGCGGTAA; REV:GGACTACHVGGGTWTCTAAT	Illumina	Yale Center for Genome Analysis	868_L2_L006_R1_sequences	sequencing by synthesis	16S rRNA	V4	20	UBERON:feces	UBERON:feces	UBERON:feces	10.5	not applicable	not applicable	not applicable	2010-07-07	HC	TRUE	urban biome	human-associated habitat	feces	human-gut	2010-07-07	Sweden	human	Homo sapiens	1629:901	9606	HC	60.128	18.644	901	not applicable	LBNL	FALSE	stool	human gut metagenome	female	IBD	1629	4	not applicable
1629.SubjectIBD525	CGTGTTTC	GTGCCAGCMGCCGCGGTAA	LBNL	Jansson_Lamendella_Crohns	Illumina HiSeq 2000	Illumina V4 515F/806RBC	GT	FWD:GTGCCAGCMGCCGCGGTAA; REV:GGACTACHVGGGTWTCTAAT	Illumina	Yale Center for Genome Analysis	868_L3_L007_R1_sequences	sequencing by synthesis	16S rRNA	V4	20	UBERON:feces	UBERON:feces	UBERON:feces	12.8	not applicable	not applicable	not applicable	2010-10-15	HC	TRUE	urban biome	human-associated habitat	feces	human-gut	2010-10-15	Sweden	human	Homo sapiens	1629:901	9606	HC	60.128	18.644	901	not applicable	LBNL	FALSE	stool	human gut metagenome	female	IBD	1629	5	not applicable
1629.SubjectIBD526	TCGGTTGG	GTGCCAGCMGCCGCGGTAA	LBNL	Jansson_Lamendella_Crohns	Illumina HiSeq 2000	Illumina V4 515F/806RBC	GT	FWD:GTGCCAGCMGCCGCGGTAA; REV:GGACTACHVGGGTWTCTAAT	Illumina	Yale Center for Genome Analysis	868_L2_L006_R1_sequences	sequencing by synthesis	16S rRNA	V4	20	UBERON:feces	UBERON:feces	UBERON:feces	13.8	not applicable	not applicable	not applicable	2011-01-20	HC	TRUE	urban biome	human-associated habitat	feces	human-gut	2011-01-20	Sweden	human	Homo sapiens	1629:901	9606	HC	60.128	18.644	901	not applicable	LBNL	FALSE	stool	human gut metagenome	female	IBD	1629	6	not applicable
1629.SubjectIBD527	AGGCTGAT	GTGCCAGCMGCCGCGGTAA	LBNL	Jansson_Lamendella_Crohns	Illumina HiSeq 2000	Illumina V4 515F/806RBC	GT	FWD:GTGCCAGCMGCCGCGGTAA; REV:GGACTACHVGGGTWTCTAAT	Illumina	Yale Center for Genome Analysis	868_L4_L008_R1_sequences	sequencing by synthesis	16S rRNA	V4	20	UBERON:feces	UBERON:feces	UBERON:feces	not applicable	not applicable	not applicable	not applicable	2011-04-28	HC	TRUE	urban biome	human-associated habitat	feces	human-gut	2011-04-28	Sweden	human	Homo sapiens	1629:901	9606	HC	60.128	18.644	901	not applicable	LBNL	FALSE	stool	human gut metagenome	female	IBD	1629	7	not applicable
1629.SubjectIBD539	GATATGCG	GTGCCAGCMGCCGCGGTAA	LBNL	Jansson_Lamendella_Crohns	Illumina HiSeq 2000	Illumina V4 515F/806RBC	GT	FWD:GTGCCAGCMGCCGCGGTAA; REV:GGACTACHVGGGTWTCTAAT	Illumina	Yale Center for Genome Analysis	868_L2_L006_R1_sequences	sequencing by synthesis	16S rRNA	V4	22	UBERON:feces	UBERON:feces	UBERON:feces	63	not applicable	not applicable	not applicable	2010-05-11	HC	TRUE	urban biome	human-associated habitat	feces	human-gut	2010-05-11	Sweden	human	Homo sapiens	1629:908	9606	HC	60.128	18.644	908	not applicable	LBNL	FALSE	stool	human gut metagenome	female	IBD	1629	5	not applicable
1629.SubjectIBD538	GTCGTTAA	GTGCCAGCMGCCGCGGTAA	LBNL	Jansson_Lamendella_Crohns	Illumina HiSeq 2000	Illumina V4 515F/806RBC	GT	FWD:GTGCCAGCMGCCGCGGTAA; REV:GGACTACHVGGGTWTCTAAT	Illumina	Yale Center for Genome Analysis	868_L2_L006_R1_sequences	sequencing by synthesis	16S rRNA	V4	22	UBERON:feces	UBERON:feces	UBERON:feces	35	not applicable	not applicable	not applicable	2010-01-08	HC	TRUE	urban biome	human-associated habitat	feces	human-gut	2010-01-08	Sweden	human	Homo sapiens	1629:908	9606	HC	60.128	18.644	908	not applicable	LBNL	FALSE	stool	human gut metagenome	female	IBD	1629	4	not applicable
1629.SubjectIBD234	TTGCCACT	GTGCCAGCMGCCGCGGTAA	LBNL	Jansson_Lamendella_Crohns	Illumina HiSeq 2000	Illumina V4 515F/806RBC	GT	FWD:GTGCCAGCMGCCGCGGTAA; REV:GGACTACHVGGGTWTCTAAT	Illumina	Yale Center for Genome Analysis	868_L2_L006_R1_sequences	sequencing by synthesis	16S rRNA	V4	29	UBERON:feces	UBERON:feces	UBERON:feces	960	Non-stricturing, non-penetrating (B1)	Ileocolonic and Upper-GI (L3+L4)	no	2010-07-01	CD	TRUE	urban biome	human-associated habitat	feces	human-gut	2010-07-01	Sweden	human	Homo sapiens	1629:372	9606	ICD_nr	60.128	18.644	372	no	LBNL	FALSE	stool	human gut metagenome	male	IBD	1629	2	not applicable
1629.SubjectIBD233	AGGCTGAT	GTGCCAGCMGCCGCGGTAA	LBNL	Jansson_Lamendella_Crohns	Illumina HiSeq 2000	Illumina V4 515F/806RBC	GT	FWD:GTGCCAGCMGCCGCGGTAA; REV:GGACTACHVGGGTWTCTAAT	Illumina	Yale Center for Genome Analysis	868_L2_L006_R1_sequences	sequencing by synthesis	16S rRNA	V4	20	UBERON:feces	UBERON:feces	UBERON:feces	411	Stricturing (B2)	Ileal (L1)	yes	2010-04-20	CD	TRUE	urban biome	human-associated habitat	feces	human-gut	2010-04-20	Sweden	human	Homo sapiens	1629:352	9606	ICD_r	60.128	18.644	352	no	LBNL	FALSE	stool	human gut metagenome	female	IBD	1629	1	not applicable
1629.SubjectIBD531	TTATATTG	GTGCCAGCMGCCGCGGTAA	LBNL	Jansson_Lamendella_Crohns	Illumina HiSeq 2000	Illumina V4 515F/806RBC	GT	FWD:GTGCCAGCMGCCGCGGTAA; REV:GGACTACHVGGGTWTCTAAT	Illumina	Yale Center for Genome Analysis	868_L1_L005_R1_sequences	sequencing by synthesis	16S rRNA	V4	24	UBERON:feces	UBERON:feces	UBERON:feces	156	Stricturing (B2)	Colonic (L2)	not applicable	2009-06-24	CD	TRUE	urban biome	human-associated habitat	feces	human-gut	2009-06-24	Sweden	human	Homo sapiens	1629:905	9606	CCD	60.128	18.644	905	yes	LBNL	FALSE	stool	human gut metagenome	female	IBD	1629	1	not applicable
1629.SubjectIBD396	GCCTCCCT	GTGCCAGCMGCCGCGGTAA	LBNL	Jansson_Lamendella_Crohns	Illumina HiSeq 2000	Illumina V4 515F/806RBC	GT	FWD:GTGCCAGCMGCCGCGGTAA; REV:GGACTACHVGGGTWTCTAAT	Illumina	Yale Center for Genome Analysis	868_L3_L007_R1_sequences	sequencing by synthesis	16S rRNA	V4	18	UBERON:feces	UBERON:feces	UBERON:feces	289	Non-stricturing, non-penetrating (B1)	Colonic (L2)	no	2010-08-26	CD	TRUE	urban biome	human-associated habitat	feces	human-gut	2010-08-26	Sweden	human	Homo sapiens	1629:680	9606	CCD	60.128	18.644	680	no	LBNL	FALSE	stool	human gut metagenome	female	IBD	1629	5	not applicable
1629.SubjectIBD328	AACCGTTC	GTGCCAGCMGCCGCGGTAA	LBNL	Jansson_Lamendella_Crohns	Illumina HiSeq 2000	Illumina V4 515F/806RBC	GT	FWD:GTGCCAGCMGCCGCGGTAA; REV:GGACTACHVGGGTWTCTAAT	Illumina	Yale Center for Genome Analysis	868_L4_L008_R1_sequences	sequencing by synthesis	16S rRNA	V4	26	UBERON:feces	UBERON:feces	UBERON:feces	538	Stricturing (B2)	Ileal (L1)	yes	2011-05-23	CD	TRUE	urban biome	human-associated habitat	feces	human-gut	2011-05-23	Sweden	human	Homo sapiens	1629:525	9606	ICD_r	60.128	18.644	525	no	LBNL	FALSE	stool	human gut metagenome	male	IBD	1629	6	not applicable
1629.SubjectIBD329	CAGAATCT	GTGCCAGCMGCCGCGGTAA	LBNL	Jansson_Lamendella_Crohns	Illumina HiSeq 2000	Illumina V4 515F/806RBC	GT	FWD:GTGCCAGCMGCCGCGGTAA; REV:GGACTACHVGGGTWTCTAAT	Illumina	Yale Center for Genome Analysis	868_L2_L006_R1_sequences	sequencing by synthesis	16S rRNA	V4	25	UBERON:feces	UBERON:feces	UBERON:feces	35	Penetrating (B3)	Ileal (L1)	yes	2010-03-03	CD	TRUE	urban biome	human-associated habitat	feces	human-gut	2010-03-03	Sweden	human	Homo sapiens	1629:543	9606	ICD_r	60.128	18.644	543	yes	LBNL	FALSE	stool	human gut metagenome	male	IBD	1629	2	not applicable
1629.SubjectIBD304	GCTCGCTA	GTGCCAGCMGCCGCGGTAA	LBNL	Jansson_Lamendella_Crohns	Illumina HiSeq 2000	Illumina V4 515F/806RBC	GT	FWD:GTGCCAGCMGCCGCGGTAA; REV:GGACTACHVGGGTWTCTAAT	Illumina	Yale Center for Genome Analysis	868_L2_L006_R1_sequences	sequencing by synthesis	16S rRNA	V4	25	UBERON:feces	UBERON:feces	UBERON:feces	1068	Non-stricturing, non-penetrating (B1)	Ileal (L1)	no	2010-03-25	CD	TRUE	urban biome	human-associated habitat	feces	human-gut	2010-03-25	Sweden	human	Homo sapiens	1629:492	9606	ICD_nr	60.128	18.644	492	no	LBNL	FALSE	stool	human gut metagenome	female	IBD	1629	3	not applicable
1629.SubjectIBD305	CTTGCCTT	GTGCCAGCMGCCGCGGTAA	LBNL	Jansson_Lamendella_Crohns	Illumina HiSeq 2000	Illumina V4 515F/806RBC	GT	FWD:GTGCCAGCMGCCGCGGTAA; REV:GGACTACHVGGGTWTCTAAT	Illumina	Yale Center for Genome Analysis	868_L2_L006_R1_sequences	sequencing by synthesis	16S rRNA	V4	25	UBERON:feces	UBERON:feces	UBERON:feces	992	Non-stricturing, non-penetrating (B1)	Ileal (L1)	no	2010-06-22	CD	TRUE	urban biome	human-associated habitat	feces	human-gut	2010-06-22	Sweden	human	Homo sapiens	1629:492	9606	ICD_nr	60.128	18.644	492	no	LBNL	FALSE	stool	human gut metagenome	female	IBD	1629	4	not applicable
1629.SubjectIBD306	ACCCTGTA	GTGCCAGCMGCCGCGGTAA	LBNL	Jansson_Lamendella_Crohns	Illumina HiSeq 2000	Illumina V4 515F/806RBC	GT	FWD:GTGCCAGCMGCCGCGGTAA; REV:GGACTACHVGGGTWTCTAAT	Illumina	Yale Center for Genome Analysis	868_L3_L007_R1_sequences	sequencing by synthesis	16S rRNA	V4	25	UBERON:feces	UBERON:feces	UBERON:feces	1456	Non-stricturing, non-penetrating (B1)	Ileal (L1)	no	2010-09-16	CD	TRUE	urban biome	human-associated habitat	feces	human-gut	2010-09-16	Sweden	human	Homo sapiens	1629:492	9606	ICD_nr	60.128	18.644	492	no	LBNL	FALSE	stool	human gut metagenome	female	IBD	1629	5	not applicable
1629.SubjectIBD307	CGTGATCT	GTGCCAGCMGCCGCGGTAA	LBNL	Jansson_Lamendella_Crohns	Illumina HiSeq 2000	Illumina V4 515F/806RBC	GT	FWD:GTGCCAGCMGCCGCGGTAA; REV:GGACTACHVGGGTWTCTAAT	Illumina	Yale Center for Genome Analysis	868_L2_L006_R1_sequences	sequencing by synthesis	16S rRNA	V4	25	UBERON:feces	UBERON:feces	UBERON:feces	1173	Non-stricturing, non-penetrating (B1)	Ileal (L1)	no	2010-12-16	CD	TRUE	urban biome	human-associated habitat	feces	human-gut	2010-12-16	Sweden	human	Homo sapiens	1629:492	9606	ICD_nr	60.128	18.644	492	no	LBNL	FALSE	stool	human gut metagenome	female	IBD	1629	6	not applicable
1629.SubjectIBD308	GTGTCTAC	GTGCCAGCMGCCGCGGTAA	LBNL	Jansson_Lamendella_Crohns	Illumina HiSeq 2000	Illumina V4 515F/806RBC	GT	FWD:GTGCCAGCMGCCGCGGTAA; REV:GGACTACHVGGGTWTCTAAT	Illumina	Yale Center for Genome Analysis	868_L1_L005_R1_sequences	sequencing by synthesis	16S rRNA	V4	25	UBERON:feces	UBERON:feces	UBERON:feces	579	Non-stricturing, non-penetrating (B1)	Ileal (L1)	no	2009-03-30	CD	TRUE	urban biome	human-associated habitat	feces	human-gut	2009-03-30	Sweden	human	Homo sapiens	1629:492	9606	ICD_nr	60.128	18.644	492	no	LBNL	FALSE	stool	human gut metagenome	female	IBD	1629	1	not applicable
1629.SubjectIBD309	GAGCCTTA	GTGCCAGCMGCCGCGGTAA	LBNL	Jansson_Lamendella_Crohns	Illumina HiSeq 2000	Illumina V4 515F/806RBC	GT	FWD:GTGCCAGCMGCCGCGGTAA; REV:GGACTACHVGGGTWTCTAAT	Illumina	Yale Center for Genome Analysis	868_L1_L005_R1_sequences	sequencing by synthesis	16S rRNA	V4	25	UBERON:feces	UBERON:feces	UBERON:feces	628	Non-stricturing, non-penetrating (B1)	Ileal (L1)	no	2009-07-09	CD	TRUE	urban biome	human-associated habitat	feces	human-gut	2009-07-09	Sweden	human	Homo sapiens	1629:492	9606	ICD_nr	60.128	18.644	492	no	LBNL	FALSE	stool	human gut metagenome	female	IBD	1629	2	not applicable
1629.SubjectIBD390	TAACGGCG	GTGCCAGCMGCCGCGGTAA	LBNL	Jansson_Lamendella_Crohns	Illumina HiSeq 2000	Illumina V4 515F/806RBC	GT	FWD:GTGCCAGCMGCCGCGGTAA; REV:GGACTACHVGGGTWTCTAAT	Illumina	Yale Center for Genome Analysis	868_L2_L006_R1_sequences	sequencing by synthesis	16S rRNA	V4	21	UBERON:feces	UBERON:feces	UBERON:feces	649	Stricturing (B2)	Ileal (L1)	yes	2010-03-25	CD	TRUE	urban biome	human-associated habitat	feces	human-gut	2010-03-25	Sweden	human	Homo sapiens	1629:671	9606	ICD_r	60.128	18.644	671	yes	LBNL	FALSE	stool	human gut metagenome	male	IBD	1629	1	not applicable
1629.SubjectIBD472	GATCTCAT	GTGCCAGCMGCCGCGGTAA	LBNL	Jansson_Lamendella_Crohns	Illumina HiSeq 2000	Illumina V4 515F/806RBC	GT	FWD:GTGCCAGCMGCCGCGGTAA; REV:GGACTACHVGGGTWTCTAAT	Illumina	Yale Center for Genome Analysis	868_L3_L007_R1_sequences	sequencing by synthesis	16S rRNA	V4	29	UBERON:feces	UBERON:feces	UBERON:feces	219	Non-stricturing, non-penetrating (B1)	Colonic (L2)	no	2010-11-02	CD	TRUE	urban biome	human-associated habitat	feces	human-gut	2010-11-02	Sweden	human	Homo sapiens	1629:875	9606	CCD	60.128	18.644	875	no	LBNL	FALSE	stool	human gut metagenome	female	IBD	1629	8	not applicable
1629.SubjectIBD473	TCGATGAA	GTGCCAGCMGCCGCGGTAA	LBNL	Jansson_Lamendella_Crohns	Illumina HiSeq 2000	Illumina V4 515F/806RBC	GT	FWD:GTGCCAGCMGCCGCGGTAA; REV:GGACTACHVGGGTWTCTAAT	Illumina	Yale Center for Genome Analysis	868_L4_L008_R1_sequences	sequencing by synthesis	16S rRNA	V4	29	UBERON:feces	UBERON:feces	UBERON:feces	428	Non-stricturing, non-penetrating (B1)	Colonic (L2)	no	2011-01-27	CD	TRUE	urban biome	human-associated habitat	feces	human-gut	2011-01-27	Sweden	human	Homo sapiens	1629:875	9606	CCD	60.128	18.644	875	no	LBNL	FALSE	stool	human gut metagenome	female	IBD	1629	9	not applicable
1629.SubjectIBD470	TGAAGAGG	GTGCCAGCMGCCGCGGTAA	LBNL	Jansson_Lamendella_Crohns	Illumina HiSeq 2000	Illumina V4 515F/806RBC	GT	FWD:GTGCCAGCMGCCGCGGTAA; REV:GGACTACHVGGGTWTCTAAT	Illumina	Yale Center for Genome Analysis	868_L2_L006_R1_sequences	sequencing by synthesis	16S rRNA	V4	29	UBERON:feces	UBERON:feces	UBERON:feces	149	Non-stricturing, non-penetrating (B1)	Colonic (L2)	no	2010-04-29	CD	TRUE	urban biome	human-associated habitat	feces	human-gut	2010-04-29	Sweden	human	Homo sapiens	1629:875	9606	CCD	60.128	18.644	875	no	LBNL	FALSE	stool	human gut metagenome	female	IBD	1629	6	not applicable
1629.SubjectIBD471	CCTATGTG	GTGCCAGCMGCCGCGGTAA	LBNL	Jansson_Lamendella_Crohns	Illumina HiSeq 2000	Illumina V4 515F/806RBC	GT	FWD:GTGCCAGCMGCCGCGGTAA; REV:GGACTACHVGGGTWTCTAAT	Illumina	Yale Center for Genome Analysis	868_L3_L007_R1_sequences	sequencing by synthesis	16S rRNA	V4	29	UBERON:feces	UBERON:feces	UBERON:feces	73	Non-stricturing, non-penetrating (B1)	Colonic (L2)	no	2010-08-03	CD	TRUE	urban biome	human-associated habitat	feces	human-gut	2010-08-03	Sweden	human	Homo sapiens	1629:875	9606	CCD	60.128	18.644	875	no	LBNL	FALSE	stool	human gut metagenome	female	IBD	1629	7	not applicable
1629.SubjectIBD474	CTCAATGA	GTGCCAGCMGCCGCGGTAA	LBNL	Jansson_Lamendella_Crohns	Illumina HiSeq 2000	Illumina V4 515F/806RBC	GT	FWD:GTGCCAGCMGCCGCGGTAA; REV:GGACTACHVGGGTWTCTAAT	Illumina	Yale Center for Genome Analysis	868_L1_L005_R1_sequences	sequencing by synthesis	16S rRNA	V4	29	UBERON:feces	UBERON:feces	UBERON:feces	186	Non-stricturing, non-penetrating (B1)	Colonic (L2)	no	2009-05-12	CD	TRUE	urban biome	human-associated habitat	feces	human-gut	2009-05-12	Sweden	human	Homo sapiens	1629:875	9606	CCD	60.128	18.644	875	no	LBNL	FALSE	stool	human gut metagenome	female	IBD	1629	2	not applicable
1629.SubjectIBD475	ACTCTTCT	GTGCCAGCMGCCGCGGTAA	LBNL	Jansson_Lamendella_Crohns	Illumina HiSeq 2000	Illumina V4 515F/806RBC	GT	FWD:GTGCCAGCMGCCGCGGTAA; REV:GGACTACHVGGGTWTCTAAT	Illumina	Yale Center for Genome Analysis	868_L1_L005_R1_sequences	sequencing by synthesis	16S rRNA	V4	29	UBERON:feces	UBERON:feces	UBERON:feces	80	Non-stricturing, non-penetrating (B1)	Colonic (L2)	no	2009-08-04	CD	TRUE	urban biome	human-associated habitat	feces	human-gut	2009-08-04	Sweden	human	Homo sapiens	1629:875	9606	CCD	60.128	18.644	875	no	LBNL	FALSE	stool	human gut metagenome	female	IBD	1629	3	not applicable
1629.SubjectIBD312	AACTATAG	GTGCCAGCMGCCGCGGTAA	LBNL	Jansson_Lamendella_Crohns	Illumina HiSeq 2000	Illumina V4 515F/806RBC	GT	FWD:GTGCCAGCMGCCGCGGTAA; REV:GGACTACHVGGGTWTCTAAT	Illumina	Yale Center for Genome Analysis	868_L1_L005_R1_sequences	sequencing by synthesis	16S rRNA	V4	29	UBERON:feces	UBERON:feces	UBERON:feces	145	Penetrating (B3)	Ileocolonic and Upper-GI (L3+L4)	yes	2010-07-14	CD	TRUE	urban biome	human-associated habitat	feces	human-gut	2010-07-14	Sweden	human	Homo sapiens	1629:507	9606	ICD_r	60.128	18.644	507	no	LBNL	FALSE	stool	human gut metagenome	female	IBD	1629	3	not applicable
1629.SubjectIBD357	CCATGTTT	GTGCCAGCMGCCGCGGTAA	LBNL	Jansson_Lamendella_Crohns	Illumina HiSeq 2000	Illumina V4 515F/806RBC	GT	FWD:GTGCCAGCMGCCGCGGTAA; REV:GGACTACHVGGGTWTCTAAT	Illumina	Yale Center for Genome Analysis	868_L1_L005_R1_sequences	sequencing by synthesis	16S rRNA	V4	25	UBERON:feces	UBERON:feces	UBERON:feces	990	Non-stricturing, non-penetrating (B1)	Colonic (L2)	no	2009-04-28	CD	TRUE	urban biome	human-associated habitat	feces	human-gut	2009-04-28	Sweden	human	Homo sapiens	1629:570	9606	CCD	60.128	18.644	570	no	LBNL	FALSE	stool	human gut metagenome	female	IBD	1629	1	not applicable
1629.SubjectIBD388	TTAGTGCG	GTGCCAGCMGCCGCGGTAA	LBNL	Jansson_Lamendella_Crohns	Illumina HiSeq 2000	Illumina V4 515F/806RBC	GT	FWD:GTGCCAGCMGCCGCGGTAA; REV:GGACTACHVGGGTWTCTAAT	Illumina	Yale Center for Genome Analysis	868_L2_L006_R1_sequences	sequencing by synthesis	16S rRNA	V4	28	UBERON:feces	UBERON:feces	UBERON:feces	721	Stricturing (B2)	Ileocolonic (L3)	no	2009-08-25	CD	TRUE	urban biome	human-associated habitat	feces	human-gut	2009-08-25	Sweden	human	Homo sapiens	1629:651	9606	ICD_nr	60.128	18.644	651	no	LBNL	FALSE	stool	human gut metagenome	male	IBD	1629	3	not applicable
1629.SubjectIBD389	ATTCGGTT	GTGCCAGCMGCCGCGGTAA	LBNL	Jansson_Lamendella_Crohns	Illumina HiSeq 2000	Illumina V4 515F/806RBC	GT	FWD:GTGCCAGCMGCCGCGGTAA; REV:GGACTACHVGGGTWTCTAAT	Illumina	Yale Center for Genome Analysis	868_L2_L006_R1_sequences	sequencing by synthesis	16S rRNA	V4	28	UBERON:feces	UBERON:feces	UBERON:feces	320	Stricturing (B2)	Ileocolonic (L3)	no	2009-11-26	CD	TRUE	urban biome	human-associated habitat	feces	human-gut	2009-11-26	Sweden	human	Homo sapiens	1629:651	9606	ICD_nr	60.128	18.644	651	no	LBNL	FALSE	stool	human gut metagenome	male	IBD	1629	4	not applicable
1629.SubjectIBD124	GTCAAACT	GTGCCAGCMGCCGCGGTAA	LBNL	Jansson_Lamendella_Crohns	Illumina HiSeq 2000	Illumina V4 515F/806RBC	GT	FWD:GTGCCAGCMGCCGCGGTAA; REV:GGACTACHVGGGTWTCTAAT	Illumina	Yale Center for Genome Analysis	868_L2_L006_R1_sequences	sequencing by synthesis	16S rRNA	V4	22	UBERON:feces	UBERON:feces	UBERON:feces	278	Non-stricturing, non-penetrating (B1)	Colonic (L2)	no	2009-09-30	CD	TRUE	urban biome	human-associated habitat	feces	human-gut	2009-09-30	Sweden	human	Homo sapiens	1629:193	9606	CCD	60.128	18.644	193	no	LBNL	FALSE	stool	human gut metagenome	female	IBD	1629	1	not applicable
1629.SubjectIBD125	GTGTACCT	GTGCCAGCMGCCGCGGTAA	LBNL	Jansson_Lamendella_Crohns	Illumina HiSeq 2000	Illumina V4 515F/806RBC	GT	FWD:GTGCCAGCMGCCGCGGTAA; REV:GGACTACHVGGGTWTCTAAT	Illumina	Yale Center for Genome Analysis	868_L2_L006_R1_sequences	sequencing by synthesis	16S rRNA	V4	22	UBERON:feces	UBERON:feces	UBERON:feces	414	Non-stricturing, non-penetrating (B1)	Colonic (L2)	no	2009-12-29	CD	TRUE	urban biome	human-associated habitat	feces	human-gut	2009-12-29	Sweden	human	Homo sapiens	1629:193	9606	CCD	60.128	18.644	193	no	LBNL	FALSE	stool	human gut metagenome	female	IBD	1629	2	not applicable
1629.SubjectIBD120	CCTTATAG	GTGCCAGCMGCCGCGGTAA	LBNL	Jansson_Lamendella_Crohns	Illumina HiSeq 2000	Illumina V4 515F/806RBC	GT	FWD:GTGCCAGCMGCCGCGGTAA; REV:GGACTACHVGGGTWTCTAAT	Illumina	Yale Center for Genome Analysis	868_L2_L006_R1_sequences	sequencing by synthesis	16S rRNA	V4	22	UBERON:feces	UBERON:feces	UBERON:feces	50	Non-stricturing, non-penetrating (B1)	Colonic (L2)	no	2010-06-21	CD	TRUE	urban biome	human-associated habitat	feces	human-gut	2010-06-21	Sweden	human	Homo sapiens	1629:193	9606	CCD	60.128	18.644	193	no	LBNL	FALSE	stool	human gut metagenome	female	IBD	1629	5	not applicable
1629.SubjectIBD121	AGCGACTG	GTGCCAGCMGCCGCGGTAA	LBNL	Jansson_Lamendella_Crohns	Illumina HiSeq 2000	Illumina V4 515F/806RBC	GT	FWD:GTGCCAGCMGCCGCGGTAA; REV:GGACTACHVGGGTWTCTAAT	Illumina	Yale Center for Genome Analysis	868_L4_L008_R1_sequences	sequencing by synthesis	16S rRNA	V4	22	UBERON:feces	UBERON:feces	UBERON:feces	196	Non-stricturing, non-penetrating (B1)	Colonic (L2)	no	2011-01-20	CD	TRUE	urban biome	human-associated habitat	feces	human-gut	2011-01-20	Sweden	human	Homo sapiens	1629:193	9606	CCD	60.128	18.644	193	no	LBNL	FALSE	stool	human gut metagenome	female	IBD	1629	7	not applicable
1629.SubjectIBD122	TGACGGAC	GTGCCAGCMGCCGCGGTAA	LBNL	Jansson_Lamendella_Crohns	Illumina HiSeq 2000	Illumina V4 515F/806RBC	GT	FWD:GTGCCAGCMGCCGCGGTAA; REV:GGACTACHVGGGTWTCTAAT	Illumina	Yale Center for Genome Analysis	868_L4_L008_R1_sequences	sequencing by synthesis	16S rRNA	V4	22	UBERON:feces	UBERON:feces	UBERON:feces	315	Non-stricturing, non-penetrating (B1)	Colonic (L2)	no	2011-03-17	CD	TRUE	urban biome	human-associated habitat	feces	human-gut	2011-03-17	Sweden	human	Homo sapiens	1629:193	9606	CCD	60.128	18.644	193	no	LBNL	FALSE	stool	human gut metagenome	female	IBD	1629	8	not applicable
1629.SubjectIBD123	GGTAGTTG	GTGCCAGCMGCCGCGGTAA	LBNL	Jansson_Lamendella_Crohns	Illumina HiSeq 2000	Illumina V4 515F/806RBC	GT	FWD:GTGCCAGCMGCCGCGGTAA; REV:GGACTACHVGGGTWTCTAAT	Illumina	Yale Center for Genome Analysis	868_L4_L008_R1_sequences	sequencing by synthesis	16S rRNA	V4	22	UBERON:feces	UBERON:feces	UBERON:feces	36	Non-stricturing, non-penetrating (B1)	Colonic (L2)	no	2011-06-20	CD	TRUE	urban biome	human-associated habitat	feces	human-gut	2011-06-20	Sweden	human	Homo sapiens	1629:193	9606	CCD	60.128	18.644	193	no	LBNL	FALSE	stool	human gut metagenome	female	IBD	1629	9	not applicable
1629.SubjectIBD052	GTTGACGA	GTGCCAGCMGCCGCGGTAA	LBNL	Jansson_Lamendella_Crohns	Illumina HiSeq 2000	Illumina V4 515F/806RBC	GT	FWD:GTGCCAGCMGCCGCGGTAA; REV:GGACTACHVGGGTWTCTAAT	Illumina	Yale Center for Genome Analysis	868_L1_L005_R1_sequences	sequencing by synthesis	16S rRNA	V4	26	UBERON:feces	UBERON:feces	UBERON:feces	113	Non-stricturing, non-penetrating (B1)	Ileal and Upper-GI (L1+L4)	yes	2009-08-11	CD	TRUE	urban biome	human-associated habitat	feces	human-gut	2009-08-11	Sweden	human	Homo sapiens	1629:105	9606	ICD_r	60.128	18.644	105	no	LBNL	FALSE	stool	human gut metagenome	female	IBD	1629	2	not applicable
1629.SubjectIBD053	TCAGACAG	GTGCCAGCMGCCGCGGTAA	LBNL	Jansson_Lamendella_Crohns	Illumina HiSeq 2000	Illumina V4 515F/806RBC	GT	FWD:GTGCCAGCMGCCGCGGTAA; REV:GGACTACHVGGGTWTCTAAT	Illumina	Yale Center for Genome Analysis	868_L2_L006_R1_sequences	sequencing by synthesis	16S rRNA	V4	26	UBERON:feces	UBERON:feces	UBERON:feces	34	Non-stricturing, non-penetrating (B1)	Ileal and Upper-GI (L1+L4)	yes	2009-12-15	CD	TRUE	urban biome	human-associated habitat	feces	human-gut	2009-12-15	Sweden	human	Homo sapiens	1629:105	9606	ICD_r	60.128	18.644	105	no	LBNL	FALSE	stool	human gut metagenome	female	IBD	1629	3	not applicable
1629.SubjectIBD191	GGTTAACA	GTGCCAGCMGCCGCGGTAA	LBNL	Jansson_Lamendella_Crohns	Illumina HiSeq 2000	Illumina V4 515F/806RBC	GT	FWD:GTGCCAGCMGCCGCGGTAA; REV:GGACTACHVGGGTWTCTAAT	Illumina	Yale Center for Genome Analysis	868_L4_L008_R1_sequences	sequencing by synthesis	16S rRNA	V4	26	UBERON:feces	UBERON:feces	UBERON:feces	30	Penetrating (B3)	Colonic (L2)	no	2011-08-16	CD	TRUE	urban biome	human-associated habitat	feces	human-gut	2011-08-16	Sweden	human	Homo sapiens	1629:288	9606	CCD	60.128	18.644	288	yes	LBNL	FALSE	stool	human gut metagenome	male	IBD	1629	5	not applicable
1629.SubjectIBD190	CGCACTCT	GTGCCAGCMGCCGCGGTAA	LBNL	Jansson_Lamendella_Crohns	Illumina HiSeq 2000	Illumina V4 515F/806RBC	GT	FWD:GTGCCAGCMGCCGCGGTAA; REV:GGACTACHVGGGTWTCTAAT	Illumina	Yale Center for Genome Analysis	868_L4_L008_R1_sequences	sequencing by synthesis	16S rRNA	V4	26	UBERON:feces	UBERON:feces	UBERON:feces	72	Penetrating (B3)	Colonic (L2)	no	2011-05-10	CD	TRUE	urban biome	human-associated habitat	feces	human-gut	2011-05-10	Sweden	human	Homo sapiens	1629:288	9606	CCD	60.128	18.644	288	yes	LBNL	FALSE	stool	human gut metagenome	male	IBD	1629	4	not applicable
1629.SubjectIBD031	ACGCATTG	GTGCCAGCMGCCGCGGTAA	LBNL	Jansson_Lamendella_Crohns	Illumina HiSeq 2000	Illumina V4 515F/806RBC	GT	FWD:GTGCCAGCMGCCGCGGTAA; REV:GGACTACHVGGGTWTCTAAT	Illumina	Yale Center for Genome Analysis	868_L2_L006_R1_sequences	sequencing by synthesis	16S rRNA	V4	22	UBERON:feces	UBERON:feces	UBERON:feces	402	Non-stricturing, non-penetrating (B1)	Ileocolonic (L3)	yes	2010-08-26	CD	TRUE	urban biome	human-associated habitat	feces	human-gut	2010-08-26	Sweden	human	Homo sapiens	1629:74	9606	ICD_r	60.128	18.644	74	no	LBNL	FALSE	stool	human gut metagenome	female	IBD	1629	7	not applicable
1629.SubjectIBD440	TAGGGTCC	GTGCCAGCMGCCGCGGTAA	LBNL	Jansson_Lamendella_Crohns	Illumina HiSeq 2000	Illumina V4 515F/806RBC	GT	FWD:GTGCCAGCMGCCGCGGTAA; REV:GGACTACHVGGGTWTCTAAT	Illumina	Yale Center for Genome Analysis	868_L4_L008_R1_sequences	sequencing by synthesis	16S rRNA	V4	27	UBERON:feces	UBERON:feces	UBERON:feces	241	Non-stricturing, non-penetrating (B1)	Colonic (L2)	no	2011-04-28	CD	TRUE	urban biome	human-associated habitat	feces	human-gut	2011-04-28	Sweden	human	Homo sapiens	1629:769	9606	CCD	60.128	18.644	769	no	LBNL	FALSE	stool	human gut metagenome	male	IBD	1629	8	not applicable
1629.SubjectIBD313	AGATTCGT	GTGCCAGCMGCCGCGGTAA	LBNL	Jansson_Lamendella_Crohns	Illumina HiSeq 2000	Illumina V4 515F/806RBC	GT	FWD:GTGCCAGCMGCCGCGGTAA; REV:GGACTACHVGGGTWTCTAAT	Illumina	Yale Center for Genome Analysis	868_L3_L007_R1_sequences	sequencing by synthesis	16S rRNA	V4	29	UBERON:feces	UBERON:feces	UBERON:feces	184	Penetrating (B3)	Ileocolonic and Upper-GI (L3+L4)	yes	2010-10-13	CD	TRUE	urban biome	human-associated habitat	feces	human-gut	2010-10-13	Sweden	human	Homo sapiens	1629:507	9606	ICD_r	60.128	18.644	507	no	LBNL	FALSE	stool	human gut metagenome	female	IBD	1629	4	not applicable
1629.SubjectIBD436	CAACCTTT	GTGCCAGCMGCCGCGGTAA	LBNL	Jansson_Lamendella_Crohns	Illumina HiSeq 2000	Illumina V4 515F/806RBC	GT	FWD:GTGCCAGCMGCCGCGGTAA; REV:GGACTACHVGGGTWTCTAAT	Illumina	Yale Center for Genome Analysis	868_L2_L006_R1_sequences	sequencing by synthesis	16S rRNA	V4	27	UBERON:feces	UBERON:feces	UBERON:feces	71	Non-stricturing, non-penetrating (B1)	Colonic (L2)	no	2010-04-14	CD	TRUE	urban biome	human-associated habitat	feces	human-gut	2010-04-14	Sweden	human	Homo sapiens	1629:769	9606	CCD	60.128	18.644	769	no	LBNL	FALSE	stool	human gut metagenome	male	IBD	1629	4	not applicable
1629.SubjectIBD437	ATGGCAGC	GTGCCAGCMGCCGCGGTAA	LBNL	Jansson_Lamendella_Crohns	Illumina HiSeq 2000	Illumina V4 515F/806RBC	GT	FWD:GTGCCAGCMGCCGCGGTAA; REV:GGACTACHVGGGTWTCTAAT	Illumina	Yale Center for Genome Analysis	868_L2_L006_R1_sequences	sequencing by synthesis	16S rRNA	V4	27	UBERON:feces	UBERON:feces	UBERON:feces	138	Non-stricturing, non-penetrating (B1)	Colonic (L2)	no	2010-07-13	CD	TRUE	urban biome	human-associated habitat	feces	human-gut	2010-07-13	Sweden	human	Homo sapiens	1629:769	9606	CCD	60.128	18.644	769	no	LBNL	FALSE	stool	human gut metagenome	male	IBD	1629	5	not applicable
1629.SubjectIBD430	GCTTACAT	GTGCCAGCMGCCGCGGTAA	LBNL	Jansson_Lamendella_Crohns	Illumina HiSeq 2000	Illumina V4 515F/806RBC	GT	FWD:GTGCCAGCMGCCGCGGTAA; REV:GGACTACHVGGGTWTCTAAT	Illumina	Yale Center for Genome Analysis	868_L2_L006_R1_sequences	sequencing by synthesis	16S rRNA	V4	27	UBERON:feces	UBERON:feces	UBERON:feces	12.8	Stricturing (B2)	Ileal (L1)	yes	2009-11-04	CD	TRUE	urban biome	human-associated habitat	feces	human-gut	2009-11-04	Sweden	human	Homo sapiens	1629:739	9606	ICD_r	60.128	18.644	739	yes	LBNL	FALSE	stool	human gut metagenome	male	IBD	1629	4	not applicable
1629.SubjectIBD537	GACTGTCA	GTGCCAGCMGCCGCGGTAA	LBNL	Jansson_Lamendella_Crohns	Illumina HiSeq 2000	Illumina V4 515F/806RBC	GT	FWD:GTGCCAGCMGCCGCGGTAA; REV:GGACTACHVGGGTWTCTAAT	Illumina	Yale Center for Genome Analysis	868_L2_L006_R1_sequences	sequencing by synthesis	16S rRNA	V4	23	UBERON:feces	UBERON:feces	UBERON:feces	27	not applicable	not applicable	not applicable	2009-08-28	HC	TRUE	urban biome	human-associated habitat	feces	human-gut	2009-08-28	Sweden	human	Homo sapiens	1629:906	9606	HC	60.128	18.644	906	not applicable	LBNL	FALSE	stool	human gut metagenome	male	IBD	1629	3	not applicable
1629.SubjectIBD536	CACACTAA	GTGCCAGCMGCCGCGGTAA	LBNL	Jansson_Lamendella_Crohns	Illumina HiSeq 2000	Illumina V4 515F/806RBC	GT	FWD:GTGCCAGCMGCCGCGGTAA; REV:GGACTACHVGGGTWTCTAAT	Illumina	Yale Center for Genome Analysis	868_L2_L006_R1_sequences	sequencing by synthesis	16S rRNA	V4	23	UBERON:feces	UBERON:feces	UBERON:feces	84	not applicable	not applicable	not applicable	2009-03-02	HC	TRUE	urban biome	human-associated habitat	feces	human-gut	2009-03-02	Sweden	human	Homo sapiens	1629:906	9606	HC	60.128	18.644	906	not applicable	LBNL	FALSE	stool	human gut metagenome	male	IBD	1629	1	not applicable
1629.SubjectIBD535	TCGACCAG	GTGCCAGCMGCCGCGGTAA	LBNL	Jansson_Lamendella_Crohns	Illumina HiSeq 2000	Illumina V4 515F/806RBC	GT	FWD:GTGCCAGCMGCCGCGGTAA; REV:GGACTACHVGGGTWTCTAAT	Illumina	Yale Center for Genome Analysis	868_L3_L007_R1_sequences	sequencing by synthesis	16S rRNA	V4	23	UBERON:feces	UBERON:feces	UBERON:feces	22	not applicable	not applicable	not applicable	2010-12-27	HC	TRUE	urban biome	human-associated habitat	feces	human-gut	2010-12-27	Sweden	human	Homo sapiens	1629:906	9606	HC	60.128	18.644	906	not applicable	LBNL	FALSE	stool	human gut metagenome	male	IBD	1629	7	not applicable
1629.SubjectIBD534	CGCTCTTT	GTGCCAGCMGCCGCGGTAA	LBNL	Jansson_Lamendella_Crohns	Illumina HiSeq 2000	Illumina V4 515F/806RBC	GT	FWD:GTGCCAGCMGCCGCGGTAA; REV:GGACTACHVGGGTWTCTAAT	Illumina	Yale Center for Genome Analysis	868_L1_L005_R1_sequences	sequencing by synthesis	16S rRNA	V4	23	UBERON:feces	UBERON:feces	UBERON:feces	15.8	not applicable	not applicable	not applicable	2010-10-04	HC	TRUE	urban biome	human-associated habitat	feces	human-gut	2010-10-04	Sweden	human	Homo sapiens	1629:906	9606	HC	60.128	18.644	906	not applicable	LBNL	FALSE	stool	human gut metagenome	male	IBD	1629	6	not applicable
1629.SubjectIBD533	GCTTGCGA	GTGCCAGCMGCCGCGGTAA	LBNL	Jansson_Lamendella_Crohns	Illumina HiSeq 2000	Illumina V4 515F/806RBC	GT	FWD:GTGCCAGCMGCCGCGGTAA; REV:GGACTACHVGGGTWTCTAAT	Illumina	Yale Center for Genome Analysis	868_L2_L006_R1_sequences	sequencing by synthesis	16S rRNA	V4	23	UBERON:feces	UBERON:feces	UBERON:feces	79	not applicable	not applicable	not applicable	2010-04-29	HC	TRUE	urban biome	human-associated habitat	feces	human-gut	2010-04-29	Sweden	human	Homo sapiens	1629:906	9606	HC	60.128	18.644	906	not applicable	LBNL	FALSE	stool	human gut metagenome	male	IBD	1629	5	not applicable
1629.SubjectIBD532	GCAGCCGA	GTGCCAGCMGCCGCGGTAA	LBNL	Jansson_Lamendella_Crohns	Illumina HiSeq 2000	Illumina V4 515F/806RBC	GT	FWD:GTGCCAGCMGCCGCGGTAA; REV:GGACTACHVGGGTWTCTAAT	Illumina	Yale Center for Genome Analysis	868_L2_L006_R1_sequences	sequencing by synthesis	16S rRNA	V4	23	UBERON:feces	UBERON:feces	UBERON:feces	68	not applicable	not applicable	not applicable	2010-01-08	HC	TRUE	urban biome	human-associated habitat	feces	human-gut	2010-01-08	Sweden	human	Homo sapiens	1629:906	9606	HC	60.128	18.644	906	not applicable	LBNL	FALSE	stool	human gut metagenome	male	IBD	1629	4	not applicable
1629.SubjectIBD438	ATGCACTG	GTGCCAGCMGCCGCGGTAA	LBNL	Jansson_Lamendella_Crohns	Illumina HiSeq 2000	Illumina V4 515F/806RBC	GT	FWD:GTGCCAGCMGCCGCGGTAA; REV:GGACTACHVGGGTWTCTAAT	Illumina	Yale Center for Genome Analysis	868_L3_L007_R1_sequences	sequencing by synthesis	16S rRNA	V4	27	UBERON:feces	UBERON:feces	UBERON:feces	180	Non-stricturing, non-penetrating (B1)	Colonic (L2)	no	2010-10-26	CD	TRUE	urban biome	human-associated habitat	feces	human-gut	2010-10-26	Sweden	human	Homo sapiens	1629:769	9606	CCD	60.128	18.644	769	no	LBNL	FALSE	stool	human gut metagenome	male	IBD	1629	6	not applicable
1629.SubjectIBD439	ATTGCAGG	GTGCCAGCMGCCGCGGTAA	LBNL	Jansson_Lamendella_Crohns	Illumina HiSeq 2000	Illumina V4 515F/806RBC	GT	FWD:GTGCCAGCMGCCGCGGTAA; REV:GGACTACHVGGGTWTCTAAT	Illumina	Yale Center for Genome Analysis	868_L2_L006_R1_sequences	sequencing by synthesis	16S rRNA	V4	27	UBERON:feces	UBERON:feces	UBERON:feces	157	Non-stricturing, non-penetrating (B1)	Colonic (L2)	no	2011-01-20	CD	TRUE	urban biome	human-associated habitat	feces	human-gut	2011-01-20	Sweden	human	Homo sapiens	1629:769	9606	CCD	60.128	18.644	769	no	LBNL	FALSE	stool	human gut metagenome	male	IBD	1629	7	not applicable
1629.SubjectIBD528	ACTTAGCT	GTGCCAGCMGCCGCGGTAA	LBNL	Jansson_Lamendella_Crohns	Illumina HiSeq 2000	Illumina V4 515F/806RBC	GT	FWD:GTGCCAGCMGCCGCGGTAA; REV:GGACTACHVGGGTWTCTAAT	Illumina	Yale Center for Genome Analysis	868_L2_L006_R1_sequences	sequencing by synthesis	16S rRNA	V4	20	UBERON:feces	UBERON:feces	UBERON:feces	15	not applicable	not applicable	not applicable	2009-10-16	HC	TRUE	urban biome	human-associated habitat	feces	human-gut	2009-10-16	Sweden	human	Homo sapiens	1629:901	9606	HC	60.128	18.644	901	not applicable	LBNL	FALSE	stool	human gut metagenome	female	IBD	1629	1	not applicable
1629.SubjectIBD549	CCTACGCC	GTGCCAGCMGCCGCGGTAA	LBNL	Jansson_Lamendella_Crohns	Illumina HiSeq 2000	Illumina V4 515F/806RBC	GT	FWD:GTGCCAGCMGCCGCGGTAA; REV:GGACTACHVGGGTWTCTAAT	Illumina	Yale Center for Genome Analysis	868_L2_L006_R1_sequences	sequencing by synthesis	16S rRNA	V4	30	UBERON:feces	UBERON:feces	UBERON:feces	1123	Non-stricturing, non-penetrating (B1)	Ileocolonic (L3)	no	2010-03-16	CD	TRUE	urban biome	human-associated habitat	feces	human-gut	2010-03-16	Sweden	human	Homo sapiens	1629:913	9606	ICD_nr	60.128	18.644	913	no	LBNL	FALSE	stool	human gut metagenome	female	IBD	1629	4	not applicable
1629.SubjectIBD542	TAATAGGC	GTGCCAGCMGCCGCGGTAA	LBNL	Jansson_Lamendella_Crohns	Illumina HiSeq 2000	Illumina V4 515F/806RBC	GT	FWD:GTGCCAGCMGCCGCGGTAA; REV:GGACTACHVGGGTWTCTAAT	Illumina	Yale Center for Genome Analysis	868_L2_L006_R1_sequences	sequencing by synthesis	16S rRNA	V4	22	UBERON:feces	UBERON:feces	UBERON:feces	98	not applicable	not applicable	not applicable	2009-05-25	HC	TRUE	urban biome	human-associated habitat	feces	human-gut	2009-05-25	Sweden	human	Homo sapiens	1629:908	9606	HC	60.128	18.644	908	not applicable	LBNL	FALSE	stool	human gut metagenome	female	IBD	1629	2	not applicable
1629.SubjectIBD543	ACTCTTCT	GTGCCAGCMGCCGCGGTAA	LBNL	Jansson_Lamendella_Crohns	Illumina HiSeq 2000	Illumina V4 515F/806RBC	GT	FWD:GTGCCAGCMGCCGCGGTAA; REV:GGACTACHVGGGTWTCTAAT	Illumina	Yale Center for Genome Analysis	868_L2_L006_R1_sequences	sequencing by synthesis	16S rRNA	V4	22	UBERON:feces	UBERON:feces	UBERON:feces	41	not applicable	not applicable	not applicable	2009-09-07	HC	TRUE	urban biome	human-associated habitat	feces	human-gut	2009-09-07	Sweden	human	Homo sapiens	1629:908	9606	HC	60.128	18.644	908	not applicable	LBNL	FALSE	stool	human gut metagenome	female	IBD	1629	3	not applicable
1629.SubjectIBD540	TGCCAGGC	GTGCCAGCMGCCGCGGTAA	LBNL	Jansson_Lamendella_Crohns	Illumina HiSeq 2000	Illumina V4 515F/806RBC	GT	FWD:GTGCCAGCMGCCGCGGTAA; REV:GGACTACHVGGGTWTCTAAT	Illumina	Yale Center for Genome Analysis	868_L2_L006_R1_sequences	sequencing by synthesis	16S rRNA	V4	22	UBERON:feces	UBERON:feces	UBERON:feces	84	not applicable	not applicable	not applicable	2010-08-25	HC	TRUE	urban biome	human-associated habitat	feces	human-gut	2010-08-25	Sweden	human	Homo sapiens	1629:908	9606	HC	60.128	18.644	908	not applicable	LBNL	FALSE	stool	human gut metagenome	female	IBD	1629	6	not applicable
1629.SubjectIBD541	CCGAGGTA	GTGCCAGCMGCCGCGGTAA	LBNL	Jansson_Lamendella_Crohns	Illumina HiSeq 2000	Illumina V4 515F/806RBC	GT	FWD:GTGCCAGCMGCCGCGGTAA; REV:GGACTACHVGGGTWTCTAAT	Illumina	Yale Center for Genome Analysis	868_L2_L006_R1_sequences	sequencing by synthesis	16S rRNA	V4	22	UBERON:feces	UBERON:feces	UBERON:feces	46	not applicable	not applicable	not applicable	2009-02-23	HC	TRUE	urban biome	human-associated habitat	feces	human-gut	2009-02-23	Sweden	human	Homo sapiens	1629:908	9606	HC	60.128	18.644	908	not applicable	LBNL	FALSE	stool	human gut metagenome	female	IBD	1629	1	not applicable
1629.SubjectIBD544	TGCTCGTA	GTGCCAGCMGCCGCGGTAA	LBNL	Jansson_Lamendella_Crohns	Illumina HiSeq 2000	Illumina V4 515F/806RBC	GT	FWD:GTGCCAGCMGCCGCGGTAA; REV:GGACTACHVGGGTWTCTAAT	Illumina	Yale Center for Genome Analysis	868_L4_L008_R1_sequences	sequencing by synthesis	16S rRNA	V4	18	UBERON:feces	UBERON:feces	UBERON:feces	377	Penetrating (B3)	Ileocolonic (L3)	yes	2010-02-25	CD	TRUE	urban biome	human-associated habitat	feces	human-gut	2010-02-25	Sweden	human	Homo sapiens	1629:910	9606	ICD_r	60.128	18.644	910	no	LBNL	FALSE	stool	human gut metagenome	female	IBD	1629	1	not applicable
1629.SubjectIBD380	GGCGACAT	GTGCCAGCMGCCGCGGTAA	LBNL	Jansson_Lamendella_Crohns	Illumina HiSeq 2000	Illumina V4 515F/806RBC	GT	FWD:GTGCCAGCMGCCGCGGTAA; REV:GGACTACHVGGGTWTCTAAT	Illumina	Yale Center for Genome Analysis	868_L2_L006_R1_sequences	sequencing by synthesis	16S rRNA	V4	21	UBERON:feces	UBERON:feces	UBERON:feces	1552	Non-stricturing, non-penetrating (B1)	Ileocolonic (L3)	no	2010-01-20	CD	TRUE	urban biome	human-associated habitat	feces	human-gut	2010-01-20	Sweden	human	Homo sapiens	1629:646	9606	ICD_nr	60.128	18.644	646	no	LBNL	FALSE	stool	human gut metagenome	female	IBD	1629	2	not applicable
1629.SubjectIBD381	CATAACAT	GTGCCAGCMGCCGCGGTAA	LBNL	Jansson_Lamendella_Crohns	Illumina HiSeq 2000	Illumina V4 515F/806RBC	GT	FWD:GTGCCAGCMGCCGCGGTAA; REV:GGACTACHVGGGTWTCTAAT	Illumina	Yale Center for Genome Analysis	868_L2_L006_R1_sequences	sequencing by synthesis	16S rRNA	V4	21	UBERON:feces	UBERON:feces	UBERON:feces	1432	Non-stricturing, non-penetrating (B1)	Ileocolonic (L3)	no	2010-03-10	CD	TRUE	urban biome	human-associated habitat	feces	human-gut	2010-03-10	Sweden	human	Homo sapiens	1629:646	9606	ICD_nr	60.128	18.644	646	no	LBNL	FALSE	stool	human gut metagenome	female	IBD	1629	3	not applicable
1629.SubjectIBD384	TGGGTTAT	GTGCCAGCMGCCGCGGTAA	LBNL	Jansson_Lamendella_Crohns	Illumina HiSeq 2000	Illumina V4 515F/806RBC	GT	FWD:GTGCCAGCMGCCGCGGTAA; REV:GGACTACHVGGGTWTCTAAT	Illumina	Yale Center for Genome Analysis	868_L2_L006_R1_sequences	sequencing by synthesis	16S rRNA	V4	28	UBERON:feces	UBERON:feces	UBERON:feces	234	Stricturing (B2)	Ileocolonic (L3)	no	2010-05-25	CD	TRUE	urban biome	human-associated habitat	feces	human-gut	2010-05-25	Sweden	human	Homo sapiens	1629:651	9606	ICD_nr	60.128	18.644	651	no	LBNL	FALSE	stool	human gut metagenome	male	IBD	1629	6	not applicable
1629.SubjectIBD385	CGTGATCT	GTGCCAGCMGCCGCGGTAA	LBNL	Jansson_Lamendella_Crohns	Illumina HiSeq 2000	Illumina V4 515F/806RBC	GT	FWD:GTGCCAGCMGCCGCGGTAA; REV:GGACTACHVGGGTWTCTAAT	Illumina	Yale Center for Genome Analysis	868_L3_L007_R1_sequences	sequencing by synthesis	16S rRNA	V4	28	UBERON:feces	UBERON:feces	UBERON:feces	40	Stricturing (B2)	Ileocolonic (L3)	no	2010-08-24	CD	TRUE	urban biome	human-associated habitat	feces	human-gut	2010-08-24	Sweden	human	Homo sapiens	1629:651	9606	ICD_nr	60.128	18.644	651	no	LBNL	FALSE	stool	human gut metagenome	male	IBD	1629	7	not applicable
1629.SubjectIBD386	TGTCCAGG	GTGCCAGCMGCCGCGGTAA	LBNL	Jansson_Lamendella_Crohns	Illumina HiSeq 2000	Illumina V4 515F/806RBC	GT	FWD:GTGCCAGCMGCCGCGGTAA; REV:GGACTACHVGGGTWTCTAAT	Illumina	Yale Center for Genome Analysis	868_L1_L005_R1_sequences	sequencing by synthesis	16S rRNA	V4	28	UBERON:feces	UBERON:feces	UBERON:feces	348	Stricturing (B2)	Ileocolonic (L3)	no	2009-03-03	CD	TRUE	urban biome	human-associated habitat	feces	human-gut	2009-03-03	Sweden	human	Homo sapiens	1629:651	9606	ICD_nr	60.128	18.644	651	no	LBNL	FALSE	stool	human gut metagenome	male	IBD	1629	1	not applicable
1629.SubjectIBD387	GCCGCTTA	GTGCCAGCMGCCGCGGTAA	LBNL	Jansson_Lamendella_Crohns	Illumina HiSeq 2000	Illumina V4 515F/806RBC	GT	FWD:GTGCCAGCMGCCGCGGTAA; REV:GGACTACHVGGGTWTCTAAT	Illumina	Yale Center for Genome Analysis	868_L2_L006_R1_sequences	sequencing by synthesis	16S rRNA	V4	28	UBERON:feces	UBERON:feces	UBERON:feces	559	Stricturing (B2)	Ileocolonic (L3)	no	2009-05-22	CD	TRUE	urban biome	human-associated habitat	feces	human-gut	2009-05-22	Sweden	human	Homo sapiens	1629:651	9606	ICD_nr	60.128	18.644	651	no	LBNL	FALSE	stool	human gut metagenome	male	IBD	1629	2	not applicable
1629.SubjectIBD003	TTCACGGG	GTGCCAGCMGCCGCGGTAA	LBNL	Jansson_Lamendella_Crohns	Illumina HiSeq 2000	Illumina V4 515F/806RBC	GT	FWD:GTGCCAGCMGCCGCGGTAA; REV:GGACTACHVGGGTWTCTAAT	Illumina	Yale Center for Genome Analysis	868_L2_L006_R1_sequences	sequencing by synthesis	16S rRNA	V4	25	UBERON:feces	UBERON:feces	UBERON:feces	258	Non-stricturing, non-penetrating (B1)	Colonic (L2)	no	2011-01-04	CD	TRUE	urban biome	human-associated habitat	feces	human-gut	2011-01-04	Sweden	human	Homo sapiens	67 days, 21:01:00	9606	CCD	60.128	18.644	1	no	LBNL	FALSE	stool	human gut metagenome	male	IBD	1629	4	not applicable
1629.SubjectIBD002	TACCTTGG	GTGCCAGCMGCCGCGGTAA	LBNL	Jansson_Lamendella_Crohns	Illumina HiSeq 2000	Illumina V4 515F/806RBC	GT	FWD:GTGCCAGCMGCCGCGGTAA; REV:GGACTACHVGGGTWTCTAAT	Illumina	Yale Center for Genome Analysis	868_L1_L005_R1_sequences	sequencing by synthesis	16S rRNA	V4	25	UBERON:feces	UBERON:feces	UBERON:feces	212	Non-stricturing, non-penetrating (B1)	Colonic (L2)	no	2010-09-16	CD	TRUE	urban biome	human-associated habitat	feces	human-gut	2010-09-16	Sweden	human	Homo sapiens	67 days, 21:01:00	9606	CCD	60.128	18.644	1	no	LBNL	FALSE	stool	human gut metagenome	male	IBD	1629	3	not applicable
1629.SubjectIBD001	CGGATTGG	GTGCCAGCMGCCGCGGTAA	LBNL	Jansson_Lamendella_Crohns	Illumina HiSeq 2000	Illumina V4 515F/806RBC	GT	FWD:GTGCCAGCMGCCGCGGTAA; REV:GGACTACHVGGGTWTCTAAT	Illumina	Yale Center for Genome Analysis	868_L2_L006_R1_sequences	sequencing by synthesis	16S rRNA	V4	25	UBERON:feces	UBERON:feces	UBERON:feces	63	Non-stricturing, non-penetrating (B1)	Colonic (L2)	no	2010-06-17	CD	TRUE	urban biome	human-associated habitat	feces	human-gut	2010-06-17	Sweden	human	Homo sapiens	67 days, 21:01:00	9606	CCD	60.128	18.644	1	no	LBNL	FALSE	stool	human gut metagenome	male	IBD	1629	2	not applicable
1629.SubjectIBD005	CAAGCTCT	GTGCCAGCMGCCGCGGTAA	LBNL	Jansson_Lamendella_Crohns	Illumina HiSeq 2000	Illumina V4 515F/806RBC	GT	FWD:GTGCCAGCMGCCGCGGTAA; REV:GGACTACHVGGGTWTCTAAT	Illumina	Yale Center for Genome Analysis	868_L4_L008_R1_sequences	sequencing by synthesis	16S rRNA	V4	25	UBERON:feces	UBERON:feces	UBERON:feces	104	Non-stricturing, non-penetrating (B1)	Colonic (L2)	no	2011-06-28	CD	TRUE	urban biome	human-associated habitat	feces	human-gut	2011-06-28	Sweden	human	Homo sapiens	67 days, 21:01:00	9606	CCD	60.128	18.644	1	no	LBNL	FALSE	stool	human gut metagenome	male	IBD	1629	6	not applicable
1629.SubjectIBD004	GAGACAGC	GTGCCAGCMGCCGCGGTAA	LBNL	Jansson_Lamendella_Crohns	Illumina HiSeq 2000	Illumina V4 515F/806RBC	GT	FWD:GTGCCAGCMGCCGCGGTAA; REV:GGACTACHVGGGTWTCTAAT	Illumina	Yale Center for Genome Analysis	868_L4_L008_R1_sequences	sequencing by synthesis	16S rRNA	V4	25	UBERON:feces	UBERON:feces	UBERON:feces	499	Non-stricturing, non-penetrating (B1)	Colonic (L2)	no	2011-04-07	CD	TRUE	urban biome	human-associated habitat	feces	human-gut	2011-04-07	Sweden	human	Homo sapiens	67 days, 21:01:00	9606	CCD	60.128	18.644	1	no	LBNL	FALSE	stool	human gut metagenome	male	IBD	1629	5	not applicable
1629.SubjectIBD317	TGACGGAC	GTGCCAGCMGCCGCGGTAA	LBNL	Jansson_Lamendella_Crohns	Illumina HiSeq 2000	Illumina V4 515F/806RBC	GT	FWD:GTGCCAGCMGCCGCGGTAA; REV:GGACTACHVGGGTWTCTAAT	Illumina	Yale Center for Genome Analysis	868_L2_L006_R1_sequences	sequencing by synthesis	16S rRNA	V4	missing: not provided	UBERON:feces	UBERON:feces	UBERON:feces	390	Stricturing (B2)	Ileocolonic (L3)	yes	2010-02-16	CD	TRUE	urban biome	human-associated habitat	feces	human-gut	2010-02-16	Sweden	human	Homo sapiens	1629:508	9606	ICD_r	60.128	18.644	508	no	LBNL	FALSE	stool	human gut metagenome	female	IBD	1629	1	not applicable
1629.SubjectIBD316	AACGTATC	GTGCCAGCMGCCGCGGTAA	LBNL	Jansson_Lamendella_Crohns	Illumina HiSeq 2000	Illumina V4 515F/806RBC	GT	FWD:GTGCCAGCMGCCGCGGTAA; REV:GGACTACHVGGGTWTCTAAT	Illumina	Yale Center for Genome Analysis	868_L4_L008_R1_sequences	sequencing by synthesis	16S rRNA	V4	29	UBERON:feces	UBERON:feces	UBERON:feces	246	Penetrating (B3)	Ileocolonic and Upper-GI (L3+L4)	yes	2011-07-21	CD	TRUE	urban biome	human-associated habitat	feces	human-gut	2011-07-21	Sweden	human	Homo sapiens	1629:507	9606	ICD_r	60.128	18.644	507	no	LBNL	FALSE	stool	human gut metagenome	female	IBD	1629	7	not applicable
1629.SubjectIBD315	TTCAACAG	GTGCCAGCMGCCGCGGTAA	LBNL	Jansson_Lamendella_Crohns	Illumina HiSeq 2000	Illumina V4 515F/806RBC	GT	FWD:GTGCCAGCMGCCGCGGTAA; REV:GGACTACHVGGGTWTCTAAT	Illumina	Yale Center for Genome Analysis	868_L4_L008_R1_sequences	sequencing by synthesis	16S rRNA	V4	29	UBERON:feces	UBERON:feces	UBERON:feces	104	Penetrating (B3)	Ileocolonic and Upper-GI (L3+L4)	yes	2011-04-13	CD	TRUE	urban biome	human-associated habitat	feces	human-gut	2011-04-13	Sweden	human	Homo sapiens	1629:507	9606	ICD_r	60.128	18.644	507	no	LBNL	FALSE	stool	human gut metagenome	female	IBD	1629	6	not applicable
1629.SubjectIBD314	GATTACTC	GTGCCAGCMGCCGCGGTAA	LBNL	Jansson_Lamendella_Crohns	Illumina HiSeq 2000	Illumina V4 515F/806RBC	GT	FWD:GTGCCAGCMGCCGCGGTAA; REV:GGACTACHVGGGTWTCTAAT	Illumina	Yale Center for Genome Analysis	868_L4_L008_R1_sequences	sequencing by synthesis	16S rRNA	V4	29	UBERON:feces	UBERON:feces	UBERON:feces	208	Penetrating (B3)	Ileocolonic and Upper-GI (L3+L4)	yes	2011-01-12	CD	TRUE	urban biome	human-associated habitat	feces	human-gut	2011-01-12	Sweden	human	Homo sapiens	1629:507	9606	ICD_r	60.128	18.644	507	no	LBNL	FALSE	stool	human gut metagenome	female	IBD	1629	5	not applicable
1629.SubjectIBD311	CAAGCTCT	GTGCCAGCMGCCGCGGTAA	LBNL	Jansson_Lamendella_Crohns	Illumina HiSeq 2000	Illumina V4 515F/806RBC	GT	FWD:GTGCCAGCMGCCGCGGTAA; REV:GGACTACHVGGGTWTCTAAT	Illumina	Yale Center for Genome Analysis	868_L2_L006_R1_sequences	sequencing by synthesis	16S rRNA	V4	29	UBERON:feces	UBERON:feces	UBERON:feces	119	Penetrating (B3)	Ileocolonic and Upper-GI (L3+L4)	yes	2010-04-08	CD	TRUE	urban biome	human-associated habitat	feces	human-gut	2010-04-08	Sweden	human	Homo sapiens	1629:507	9606	ICD_r	60.128	18.644	507	no	LBNL	FALSE	stool	human gut metagenome	female	IBD	1629	2	not applicable
1629.SubjectIBD310	CCACGAAG	GTGCCAGCMGCCGCGGTAA	LBNL	Jansson_Lamendella_Crohns	Illumina HiSeq 2000	Illumina V4 515F/806RBC	GT	FWD:GTGCCAGCMGCCGCGGTAA; REV:GGACTACHVGGGTWTCTAAT	Illumina	Yale Center for Genome Analysis	868_L2_L006_R1_sequences	sequencing by synthesis	16S rRNA	V4	29	UBERON:feces	UBERON:feces	UBERON:feces	174	Penetrating (B3)	Ileocolonic and Upper-GI (L3+L4)	yes	2010-01-19	CD	TRUE	urban biome	human-associated habitat	feces	human-gut	2010-01-19	Sweden	human	Homo sapiens	1629:507	9606	ICD_r	60.128	18.644	507	no	LBNL	FALSE	stool	human gut metagenome	female	IBD	1629	1	not applicable
1629.SubjectIBD382	AGCGACTG	GTGCCAGCMGCCGCGGTAA	LBNL	Jansson_Lamendella_Crohns	Illumina HiSeq 2000	Illumina V4 515F/806RBC	GT	FWD:GTGCCAGCMGCCGCGGTAA; REV:GGACTACHVGGGTWTCTAAT	Illumina	Yale Center for Genome Analysis	868_L2_L006_R1_sequences	sequencing by synthesis	16S rRNA	V4	21	UBERON:feces	UBERON:feces	UBERON:feces	1687	Non-stricturing, non-penetrating (B1)	Ileocolonic (L3)	no	2009-09-15	CD	TRUE	urban biome	human-associated habitat	feces	human-gut	2009-09-15	Sweden	human	Homo sapiens	1629:646	9606	ICD_nr	60.128	18.644	646	no	LBNL	FALSE	stool	human gut metagenome	female	IBD	1629	1	not applicable
1629.SubjectIBD161	ACTTTGTC	GTGCCAGCMGCCGCGGTAA	LBNL	Jansson_Lamendella_Crohns	Illumina HiSeq 2000	Illumina V4 515F/806RBC	GT	FWD:GTGCCAGCMGCCGCGGTAA; REV:GGACTACHVGGGTWTCTAAT	Illumina	Yale Center for Genome Analysis	868_L2_L006_R1_sequences	sequencing by synthesis	16S rRNA	V4	31	UBERON:feces	UBERON:feces	UBERON:feces	25	Stricturing (B2)	Ileal (L1)	yes	2010-03-10	CD	TRUE	urban biome	human-associated habitat	feces	human-gut	2010-03-10	Sweden	human	Homo sapiens	1629:245	9606	ICD_r	60.128	18.644	245	no	LBNL	FALSE	stool	human gut metagenome	female	IBD	1629	4	not applicable
1629.SubjectIBD162	CATAGTTT	GTGCCAGCMGCCGCGGTAA	LBNL	Jansson_Lamendella_Crohns	Illumina HiSeq 2000	Illumina V4 515F/806RBC	GT	FWD:GTGCCAGCMGCCGCGGTAA; REV:GGACTACHVGGGTWTCTAAT	Illumina	Yale Center for Genome Analysis	868_L4_L008_R1_sequences	sequencing by synthesis	16S rRNA	V4	31	UBERON:feces	UBERON:feces	UBERON:feces	21	Stricturing (B2)	Ileal (L1)	yes	2010-06-10	CD	TRUE	urban biome	human-associated habitat	feces	human-gut	2010-06-10	Sweden	human	Homo sapiens	1629:245	9606	ICD_r	60.128	18.644	245	no	LBNL	FALSE	stool	human gut metagenome	female	IBD	1629	5	not applicable
1629.SubjectIBD163	AGGAGTAA	GTGCCAGCMGCCGCGGTAA	LBNL	Jansson_Lamendella_Crohns	Illumina HiSeq 2000	Illumina V4 515F/806RBC	GT	FWD:GTGCCAGCMGCCGCGGTAA; REV:GGACTACHVGGGTWTCTAAT	Illumina	Yale Center for Genome Analysis	868_L2_L006_R1_sequences	sequencing by synthesis	16S rRNA	V4	31	UBERON:feces	UBERON:feces	UBERON:feces	not applicable	Stricturing (B2)	Ileal (L1)	yes	2010-12-07	CD	TRUE	urban biome	human-associated habitat	feces	human-gut	2010-12-07	Sweden	human	Homo sapiens	1629:245	9606	ICD_r	60.128	18.644	245	no	LBNL	FALSE	stool	human gut metagenome	female	IBD	1629	7	not applicable
1629.SubjectIBD164	TTCTACGG	GTGCCAGCMGCCGCGGTAA	LBNL	Jansson_Lamendella_Crohns	Illumina HiSeq 2000	Illumina V4 515F/806RBC	GT	FWD:GTGCCAGCMGCCGCGGTAA; REV:GGACTACHVGGGTWTCTAAT	Illumina	Yale Center for Genome Analysis	868_L4_L008_R1_sequences	sequencing by synthesis	16S rRNA	V4	31	UBERON:feces	UBERON:feces	UBERON:feces	56	Stricturing (B2)	Ileal (L1)	yes	2011-03-09	CD	TRUE	urban biome	human-associated habitat	feces	human-gut	2011-03-09	Sweden	human	Homo sapiens	1629:245	9606	ICD_r	60.128	18.644	245	no	LBNL	FALSE	stool	human gut metagenome	female	IBD	1629	8	not applicable
1629.SubjectIBD165	CCGAGGTA	GTGCCAGCMGCCGCGGTAA	LBNL	Jansson_Lamendella_Crohns	Illumina HiSeq 2000	Illumina V4 515F/806RBC	GT	FWD:GTGCCAGCMGCCGCGGTAA; REV:GGACTACHVGGGTWTCTAAT	Illumina	Yale Center for Genome Analysis	868_L1_L005_R1_sequences	sequencing by synthesis	16S rRNA	V4	31	UBERON:feces	UBERON:feces	UBERON:feces	35	Stricturing (B2)	Ileal (L1)	yes	2009-06-09	CD	TRUE	urban biome	human-associated habitat	feces	human-gut	2009-06-09	Sweden	human	Homo sapiens	1629:245	9606	ICD_r	60.128	18.644	245	no	LBNL	FALSE	stool	human gut metagenome	female	IBD	1629	1	not applicable
1629.SubjectIBD166	GACAAGGC	GTGCCAGCMGCCGCGGTAA	LBNL	Jansson_Lamendella_Crohns	Illumina HiSeq 2000	Illumina V4 515F/806RBC	GT	FWD:GTGCCAGCMGCCGCGGTAA; REV:GGACTACHVGGGTWTCTAAT	Illumina	Yale Center for Genome Analysis	868_L2_L006_R1_sequences	sequencing by synthesis	16S rRNA	V4	31	UBERON:feces	UBERON:feces	UBERON:feces	not applicable	Stricturing (B2)	Ileal (L1)	yes	2009-09-09	CD	TRUE	urban biome	human-associated habitat	feces	human-gut	2009-09-09	Sweden	human	Homo sapiens	1629:245	9606	ICD_r	60.128	18.644	245	no	LBNL	FALSE	stool	human gut metagenome	female	IBD	1629	2	not applicable
1629.SubjectIBD167	GATTACTC	GTGCCAGCMGCCGCGGTAA	LBNL	Jansson_Lamendella_Crohns	Illumina HiSeq 2000	Illumina V4 515F/806RBC	GT	FWD:GTGCCAGCMGCCGCGGTAA; REV:GGACTACHVGGGTWTCTAAT	Illumina	Yale Center for Genome Analysis	868_L2_L006_R1_sequences	sequencing by synthesis	16S rRNA	V4	31	UBERON:feces	UBERON:feces	UBERON:feces	34	Stricturing (B2)	Ileal (L1)	yes	2009-12-09	CD	TRUE	urban biome	human-associated habitat	feces	human-gut	2009-12-09	Sweden	human	Homo sapiens	1629:245	9606	ICD_r	60.128	18.644	245	no	LBNL	FALSE	stool	human gut metagenome	female	IBD	1629	3	not applicable
1629.SubjectIBD469	GTTGAACG	GTGCCAGCMGCCGCGGTAA	LBNL	Jansson_Lamendella_Crohns	Illumina HiSeq 2000	Illumina V4 515F/806RBC	GT	FWD:GTGCCAGCMGCCGCGGTAA; REV:GGACTACHVGGGTWTCTAAT	Illumina	Yale Center for Genome Analysis	868_L2_L006_R1_sequences	sequencing by synthesis	16S rRNA	V4	29	UBERON:feces	UBERON:feces	UBERON:feces	180	Non-stricturing, non-penetrating (B1)	Colonic (L2)	no	2010-02-02	CD	TRUE	urban biome	human-associated habitat	feces	human-gut	2010-02-02	Sweden	human	Homo sapiens	1629:875	9606	CCD	60.128	18.644	875	no	LBNL	FALSE	stool	human gut metagenome	female	IBD	1629	5	not applicable
1629.SubjectIBD506	CCGAGGTA	GTGCCAGCMGCCGCGGTAA	LBNL	Jansson_Lamendella_Crohns	Illumina HiSeq 2000	Illumina V4 515F/806RBC	GT	FWD:GTGCCAGCMGCCGCGGTAA; REV:GGACTACHVGGGTWTCTAAT	Illumina	Yale Center for Genome Analysis	868_L4_L008_R1_sequences	sequencing by synthesis	16S rRNA	V4	24	UBERON:feces	UBERON:feces	UBERON:feces	10.9	not applicable	not applicable	not applicable	2011-09-12	HC	TRUE	urban biome	human-associated habitat	feces	human-gut	2011-09-12	Sweden	human	Homo sapiens	1629:896	9606	HC	60.128	18.644	896	not applicable	LBNL	FALSE	stool	human gut metagenome	female	IBD	1629	8	not applicable
1629.SubjectIBD507	CAGATTTC	GTGCCAGCMGCCGCGGTAA	LBNL	Jansson_Lamendella_Crohns	Illumina HiSeq 2000	Illumina V4 515F/806RBC	GT	FWD:GTGCCAGCMGCCGCGGTAA; REV:GGACTACHVGGGTWTCTAAT	Illumina	Yale Center for Genome Analysis	868_L1_L005_R1_sequences	sequencing by synthesis	16S rRNA	V4	28	UBERON:feces	UBERON:feces	UBERON:feces	not applicable	not applicable	not applicable	not applicable	2010-01-07	HC	TRUE	urban biome	human-associated habitat	feces	human-gut	2010-01-07	Sweden	human	Homo sapiens	1629:898	9606	HC	60.128	18.644	898	not applicable	LBNL	FALSE	stool	human gut metagenome	male	IBD	1629	4	not applicable
1629.SubjectIBD504	GGTCGGTA	GTGCCAGCMGCCGCGGTAA	LBNL	Jansson_Lamendella_Crohns	Illumina HiSeq 2000	Illumina V4 515F/806RBC	GT	FWD:GTGCCAGCMGCCGCGGTAA; REV:GGACTACHVGGGTWTCTAAT	Illumina	Yale Center for Genome Analysis	868_L1_L005_R1_sequences	sequencing by synthesis	16S rRNA	V4	24	UBERON:feces	UBERON:feces	UBERON:feces	30	not applicable	not applicable	not applicable	2011-01-07	HC	TRUE	urban biome	human-associated habitat	feces	human-gut	2011-01-07	Sweden	human	Homo sapiens	1629:896	9606	HC	60.128	18.644	896	not applicable	LBNL	FALSE	stool	human gut metagenome	female	IBD	1629	5	not applicable
1629.SubjectIBD505	CGGATTGG	GTGCCAGCMGCCGCGGTAA	LBNL	Jansson_Lamendella_Crohns	Illumina HiSeq 2000	Illumina V4 515F/806RBC	GT	FWD:GTGCCAGCMGCCGCGGTAA; REV:GGACTACHVGGGTWTCTAAT	Illumina	Yale Center for Genome Analysis	868_L3_L007_R1_sequences	sequencing by synthesis	16S rRNA	V4	24	UBERON:feces	UBERON:feces	UBERON:feces	30	not applicable	not applicable	not applicable	2011-01-07	HC	TRUE	urban biome	human-associated habitat	feces	human-gut	2011-01-07	Sweden	human	Homo sapiens	1629:896	9606	HC	60.128	18.644	896	not applicable	LBNL	FALSE	stool	human gut metagenome	female	IBD	1629	5	not applicable
1629.SubjectIBD502	TCTCACTA	GTGCCAGCMGCCGCGGTAA	LBNL	Jansson_Lamendella_Crohns	Illumina HiSeq 2000	Illumina V4 515F/806RBC	GT	FWD:GTGCCAGCMGCCGCGGTAA; REV:GGACTACHVGGGTWTCTAAT	Illumina	Yale Center for Genome Analysis	868_L2_L006_R1_sequences	sequencing by synthesis	16S rRNA	V4	24	UBERON:feces	UBERON:feces	UBERON:feces	41	not applicable	not applicable	not applicable	2010-07-19	HC	TRUE	urban biome	human-associated habitat	feces	human-gut	2010-07-19	Sweden	human	Homo sapiens	1629:896	9606	HC	60.128	18.644	896	not applicable	LBNL	FALSE	stool	human gut metagenome	female	IBD	1629	3	not applicable
1629.SubjectIBD503	ACGTTAGC	GTGCCAGCMGCCGCGGTAA	LBNL	Jansson_Lamendella_Crohns	Illumina HiSeq 2000	Illumina V4 515F/806RBC	GT	FWD:GTGCCAGCMGCCGCGGTAA; REV:GGACTACHVGGGTWTCTAAT	Illumina	Yale Center for Genome Analysis	868_L3_L007_R1_sequences	sequencing by synthesis	16S rRNA	V4	24	UBERON:feces	UBERON:feces	UBERON:feces	17	not applicable	not applicable	not applicable	2010-10-11	HC	TRUE	urban biome	human-associated habitat	feces	human-gut	2010-10-11	Sweden	human	Homo sapiens	1629:896	9606	HC	60.128	18.644	896	not applicable	LBNL	FALSE	stool	human gut metagenome	female	IBD	1629	4	not applicable
1629.SubjectIBD268	TCGAGACG	GTGCCAGCMGCCGCGGTAA	LBNL	Jansson_Lamendella_Crohns	Illumina HiSeq 2000	Illumina V4 515F/806RBC	GT	FWD:GTGCCAGCMGCCGCGGTAA; REV:GGACTACHVGGGTWTCTAAT	Illumina	Yale Center for Genome Analysis	868_L2_L006_R1_sequences	sequencing by synthesis	16S rRNA	V4	29	UBERON:feces	UBERON:feces	UBERON:feces	12	Non-stricturing, non-penetrating (B1)	Colonic (L2)	no	2009-12-08	CD	TRUE	urban biome	human-associated habitat	feces	human-gut	2009-12-08	Sweden	human	Homo sapiens	1629:427	9606	CCD	60.128	18.644	427	yes	LBNL	FALSE	stool	human gut metagenome	female	IBD	1629	4	not applicable
1629.SubjectIBD267	GAAAGCGA	GTGCCAGCMGCCGCGGTAA	LBNL	Jansson_Lamendella_Crohns	Illumina HiSeq 2000	Illumina V4 515F/806RBC	GT	FWD:GTGCCAGCMGCCGCGGTAA; REV:GGACTACHVGGGTWTCTAAT	Illumina	Yale Center for Genome Analysis	868_L1_L005_R1_sequences	sequencing by synthesis	16S rRNA	V4	29	UBERON:feces	UBERON:feces	UBERON:feces	not applicable	Non-stricturing, non-penetrating (B1)	Colonic (L2)	no	2009-09-03	CD	TRUE	urban biome	human-associated habitat	feces	human-gut	2009-09-03	Sweden	human	Homo sapiens	1629:427	9606	CCD	60.128	18.644	427	yes	LBNL	FALSE	stool	human gut metagenome	female	IBD	1629	3	not applicable
1629.SubjectIBD266	CTACAATG	GTGCCAGCMGCCGCGGTAA	LBNL	Jansson_Lamendella_Crohns	Illumina HiSeq 2000	Illumina V4 515F/806RBC	GT	FWD:GTGCCAGCMGCCGCGGTAA; REV:GGACTACHVGGGTWTCTAAT	Illumina	Yale Center for Genome Analysis	868_L1_L005_R1_sequences	sequencing by synthesis	16S rRNA	V4	29	UBERON:feces	UBERON:feces	UBERON:feces	29	Non-stricturing, non-penetrating (B1)	Colonic (L2)	no	2009-06-09	CD	TRUE	urban biome	human-associated habitat	feces	human-gut	2009-06-09	Sweden	human	Homo sapiens	1629:427	9606	CCD	60.128	18.644	427	yes	LBNL	FALSE	stool	human gut metagenome	female	IBD	1629	2	not applicable
1629.SubjectIBD265	ACAAAGGC	GTGCCAGCMGCCGCGGTAA	LBNL	Jansson_Lamendella_Crohns	Illumina HiSeq 2000	Illumina V4 515F/806RBC	GT	FWD:GTGCCAGCMGCCGCGGTAA; REV:GGACTACHVGGGTWTCTAAT	Illumina	Yale Center for Genome Analysis	868_L2_L006_R1_sequences	sequencing by synthesis	16S rRNA	V4	29	UBERON:feces	UBERON:feces	UBERON:feces	15.8	Non-stricturing, non-penetrating (B1)	Colonic (L2)	no	2010-12-07	CD	TRUE	urban biome	human-associated habitat	feces	human-gut	2010-12-07	Sweden	human	Homo sapiens	1629:427	9606	CCD	60.128	18.644	427	yes	LBNL	FALSE	stool	human gut metagenome	female	IBD	1629	8	not applicable
1629.SubjectIBD264	CAGATTTC	GTGCCAGCMGCCGCGGTAA	LBNL	Jansson_Lamendella_Crohns	Illumina HiSeq 2000	Illumina V4 515F/806RBC	GT	FWD:GTGCCAGCMGCCGCGGTAA; REV:GGACTACHVGGGTWTCTAAT	Illumina	Yale Center for Genome Analysis	868_L3_L007_R1_sequences	sequencing by synthesis	16S rRNA	V4	29	UBERON:feces	UBERON:feces	UBERON:feces	not applicable	Non-stricturing, non-penetrating (B1)	Colonic (L2)	no	2010-09-07	CD	TRUE	urban biome	human-associated habitat	feces	human-gut	2010-09-07	Sweden	human	Homo sapiens	1629:427	9606	CCD	60.128	18.644	427	yes	LBNL	FALSE	stool	human gut metagenome	female	IBD	1629	7	not applicable
1629.SubjectIBD263	ATTCTAGC	GTGCCAGCMGCCGCGGTAA	LBNL	Jansson_Lamendella_Crohns	Illumina HiSeq 2000	Illumina V4 515F/806RBC	GT	FWD:GTGCCAGCMGCCGCGGTAA; REV:GGACTACHVGGGTWTCTAAT	Illumina	Yale Center for Genome Analysis	868_L2_L006_R1_sequences	sequencing by synthesis	16S rRNA	V4	29	UBERON:feces	UBERON:feces	UBERON:feces	10.2	Non-stricturing, non-penetrating (B1)	Colonic (L2)	no	2010-06-03	CD	TRUE	urban biome	human-associated habitat	feces	human-gut	2010-06-03	Sweden	human	Homo sapiens	1629:427	9606	CCD	60.128	18.644	427	yes	LBNL	FALSE	stool	human gut metagenome	female	IBD	1629	6	not applicable
1629.SubjectIBD262	CATTCGAT	GTGCCAGCMGCCGCGGTAA	LBNL	Jansson_Lamendella_Crohns	Illumina HiSeq 2000	Illumina V4 515F/806RBC	GT	FWD:GTGCCAGCMGCCGCGGTAA; REV:GGACTACHVGGGTWTCTAAT	Illumina	Yale Center for Genome Analysis	868_L2_L006_R1_sequences	sequencing by synthesis	16S rRNA	V4	29	UBERON:feces	UBERON:feces	UBERON:feces	17.3	Non-stricturing, non-penetrating (B1)	Colonic (L2)	no	2010-03-04	CD	TRUE	urban biome	human-associated habitat	feces	human-gut	2010-03-04	Sweden	human	Homo sapiens	1629:427	9606	CCD	60.128	18.644	427	yes	LBNL	FALSE	stool	human gut metagenome	female	IBD	1629	5	not applicable
1629.SubjectIBD261	GACAGCGT	GTGCCAGCMGCCGCGGTAA	LBNL	Jansson_Lamendella_Crohns	Illumina HiSeq 2000	Illumina V4 515F/806RBC	GT	FWD:GTGCCAGCMGCCGCGGTAA; REV:GGACTACHVGGGTWTCTAAT	Illumina	Yale Center for Genome Analysis	868_L1_L005_R1_sequences	sequencing by synthesis	16S rRNA	V4	29	UBERON:feces	UBERON:feces	UBERON:feces	97	Penetrating (B3)	Ileocolonic (L3)	yes	2009-05-19	CD	TRUE	urban biome	human-associated habitat	feces	human-gut	2009-05-19	Sweden	human	Homo sapiens	1629:423	9606	ICD_r	60.128	18.644	423	no	LBNL	FALSE	stool	human gut metagenome	male	IBD	1629	1	not applicable
1629.SubjectIBD260	GATCGCAG	GTGCCAGCMGCCGCGGTAA	LBNL	Jansson_Lamendella_Crohns	Illumina HiSeq 2000	Illumina V4 515F/806RBC	GT	FWD:GTGCCAGCMGCCGCGGTAA; REV:GGACTACHVGGGTWTCTAAT	Illumina	Yale Center for Genome Analysis	868_L2_L006_R1_sequences	sequencing by synthesis	16S rRNA	V4	38	UBERON:feces	UBERON:feces	UBERON:feces	593	Stricturing (B2)	Ileal (L1)	yes	2009-12-16	CD	TRUE	urban biome	human-associated habitat	feces	human-gut	2009-12-16	Sweden	human	Homo sapiens	1629:416	9606	ICD_r	60.128	18.644	416	no	LBNL	FALSE	stool	human gut metagenome	male	IBD	1629	1	not applicable
1629.SubjectIBD283	GGAGTCGG	GTGCCAGCMGCCGCGGTAA	LBNL	Jansson_Lamendella_Crohns	Illumina HiSeq 2000	Illumina V4 515F/806RBC	GT	FWD:GTGCCAGCMGCCGCGGTAA; REV:GGACTACHVGGGTWTCTAAT	Illumina	Yale Center for Genome Analysis	868_L1_L005_R1_sequences	sequencing by synthesis	16S rRNA	V4	23	UBERON:feces	UBERON:feces	UBERON:feces	22	Non-stricturing, non-penetrating (B1)	Colonic (L2)	no	2009-03-11	CD	TRUE	urban biome	human-associated habitat	feces	human-gut	2009-03-11	Sweden	human	Homo sapiens	1629:465	9606	CCD	60.128	18.644	465	no	LBNL	FALSE	stool	human gut metagenome	female	IBD	1629	1	not applicable
1629.SubjectIBD282	CTAGAGAC	GTGCCAGCMGCCGCGGTAA	LBNL	Jansson_Lamendella_Crohns	Illumina HiSeq 2000	Illumina V4 515F/806RBC	GT	FWD:GTGCCAGCMGCCGCGGTAA; REV:GGACTACHVGGGTWTCTAAT	Illumina	Yale Center for Genome Analysis	868_L3_L007_R1_sequences	sequencing by synthesis	16S rRNA	V4	23	UBERON:feces	UBERON:feces	UBERON:feces	28	Non-stricturing, non-penetrating (B1)	Colonic (L2)	no	2010-08-06	CD	TRUE	urban biome	human-associated habitat	feces	human-gut	2010-08-06	Sweden	human	Homo sapiens	1629:465	9606	CCD	60.128	18.644	465	no	LBNL	FALSE	stool	human gut metagenome	female	IBD	1629	3	not applicable
1629.SubjectIBD284	ACACCCTC	GTGCCAGCMGCCGCGGTAA	LBNL	Jansson_Lamendella_Crohns	Illumina HiSeq 2000	Illumina V4 515F/806RBC	GT	FWD:GTGCCAGCMGCCGCGGTAA; REV:GGACTACHVGGGTWTCTAAT	Illumina	Yale Center for Genome Analysis	868_L1_L005_R1_sequences	sequencing by synthesis	16S rRNA	V4	23	UBERON:feces	UBERON:feces	UBERON:feces	16.6	Non-stricturing, non-penetrating (B1)	Colonic (L2)	no	2009-06-16	CD	TRUE	urban biome	human-associated habitat	feces	human-gut	2009-06-16	Sweden	human	Homo sapiens	1629:465	9606	CCD	60.128	18.644	465	no	LBNL	FALSE	stool	human gut metagenome	female	IBD	1629	2	not applicable
1629.SubjectIBD324	GTGTCTAC	GTGCCAGCMGCCGCGGTAA	LBNL	Jansson_Lamendella_Crohns	Illumina HiSeq 2000	Illumina V4 515F/806RBC	GT	FWD:GTGCCAGCMGCCGCGGTAA; REV:GGACTACHVGGGTWTCTAAT	Illumina	Yale Center for Genome Analysis	868_L2_L006_R1_sequences	sequencing by synthesis	16S rRNA	V4	26	UBERON:feces	UBERON:feces	UBERON:feces	404	Stricturing (B2)	Ileal (L1)	yes	2010-05-17	CD	TRUE	urban biome	human-associated habitat	feces	human-gut	2010-05-17	Sweden	human	Homo sapiens	1629:525	9606	ICD_r	60.128	18.644	525	no	LBNL	FALSE	stool	human gut metagenome	male	IBD	1629	2	not applicable
1629.SubjectIBD563	ACAGGAAC	GTGCCAGCMGCCGCGGTAA	LBNL	Jansson_Lamendella_Crohns	Illumina HiSeq 2000	Illumina V4 515F/806RBC	GT	FWD:GTGCCAGCMGCCGCGGTAA; REV:GGACTACHVGGGTWTCTAAT	Illumina	Yale Center for Genome Analysis	868_L3_L007_R1_sequences	sequencing by synthesis	16S rRNA	V4	38	UBERON:feces	UBERON:feces	UBERON:feces	670	Stricturing (B2)	Ileal (L1)	yes	2010-09-14	CD	TRUE	urban biome	human-associated habitat	feces	human-gut	2010-09-14	Sweden	human	Homo sapiens	1629:416	9606	ICD_r	60.128	18.644	416	no	LBNL	FALSE	stool	human gut metagenome	male	IBD	1629	4	not applicable
1629.SubjectIBD556	AACGTATC	GTGCCAGCMGCCGCGGTAA	LBNL	Jansson_Lamendella_Crohns	Illumina HiSeq 2000	Illumina V4 515F/806RBC	GT	FWD:GTGCCAGCMGCCGCGGTAA; REV:GGACTACHVGGGTWTCTAAT	Illumina	Yale Center for Genome Analysis	868_L2_L006_R1_sequences	sequencing by synthesis	16S rRNA	V4	27	UBERON:feces	UBERON:feces	UBERON:feces	94	Non-stricturing, non-penetrating (B1)	Colonic (L2)	no	2010-05-27	CD	TRUE	urban biome	human-associated habitat	feces	human-gut	2010-05-27	Sweden	human	Homo sapiens	1629:413	9606	CCD	60.128	18.644	413	no	LBNL	FALSE	stool	human gut metagenome	male	IBD	1629	5	not applicable
1629.SubjectIBD676	GTTGGCAT	GTGCCAGCMGCCGCGGTAA	LBNL	Jansson_Lamendella_Crohns	Illumina HiSeq 2000	Illumina V4 515F/806RBC	GT	FWD:GTGCCAGCMGCCGCGGTAA; REV:GGACTACHVGGGTWTCTAAT	Illumina	Yale Center for Genome Analysis	868_L2_L006_R1_sequences	sequencing by synthesis	16S rRNA	V4	29	UBERON:feces	UBERON:feces	UBERON:feces	84	Stricturing (B2)	Ileal (L1)	yes	2010-03-17	CD	TRUE	urban biome	human-associated habitat	feces	human-gut	2010-03-17	Sweden	human	Homo sapiens	1629:318	9606	ICD_r	60.128	18.644	318	no	LBNL	FALSE	stool	human gut metagenome	male	IBD	1629	1	not applicable
1629.SubjectIBD670	GTAGAGCT	GTGCCAGCMGCCGCGGTAA	LBNL	Jansson_Lamendella_Crohns	Illumina HiSeq 2000	Illumina V4 515F/806RBC	GT	FWD:GTGCCAGCMGCCGCGGTAA; REV:GGACTACHVGGGTWTCTAAT	Illumina	Yale Center for Genome Analysis	868_L2_L006_R1_sequences	sequencing by synthesis	16S rRNA	V4	38	UBERON:feces	UBERON:feces	UBERON:feces	561	Stricturing (B2)	Ileal (L1)	yes	2010-06-10	CD	TRUE	urban biome	human-associated habitat	feces	human-gut	2010-06-10	Sweden	human	Homo sapiens	1629:416	9606	ICD_r	60.128	18.644	416	no	LBNL	FALSE	stool	human gut metagenome	male	IBD	1629	3	not applicable
1629.SubjectIBD656	GCCGATTC	GTGCCAGCMGCCGCGGTAA	LBNL	Jansson_Lamendella_Crohns	Illumina HiSeq 2000	Illumina V4 515F/806RBC	GT	FWD:GTGCCAGCMGCCGCGGTAA; REV:GGACTACHVGGGTWTCTAAT	Illumina	Yale Center for Genome Analysis	868_L3_L007_R1_sequences	sequencing by synthesis	16S rRNA	V4	18	UBERON:feces	UBERON:feces	UBERON:feces	593	Stricturing (B2)	Ileocolonic (L3)	yes	2010-10-14	CD	TRUE	urban biome	human-associated habitat	feces	human-gut	2010-10-14	Sweden	human	Homo sapiens	1629:191	9606	ICD_r	60.128	18.644	191	no	LBNL	FALSE	stool	human gut metagenome	female	IBD	1629	7	not applicable
1629.SubjectIBD657	GCCTCCCT	GTGCCAGCMGCCGCGGTAA	LBNL	Jansson_Lamendella_Crohns	Illumina HiSeq 2000	Illumina V4 515F/806RBC	GT	FWD:GTGCCAGCMGCCGCGGTAA; REV:GGACTACHVGGGTWTCTAAT	Illumina	Yale Center for Genome Analysis	868_L1_L005_R1_sequences	sequencing by synthesis	16S rRNA	V4	21	UBERON:feces	UBERON:feces	UBERON:feces	11.9	not applicable	not applicable	not applicable	2010-04-14	HC	TRUE	urban biome	human-associated habitat	feces	human-gut	2010-04-14	Sweden	human	Homo sapiens	1629:893	9606	HC	60.128	18.644	893	not applicable	LBNL	FALSE	stool	human gut metagenome	female	IBD	1629	3	not applicable
1629.SubjectIBD645	GAGTCAAC	GTGCCAGCMGCCGCGGTAA	LBNL	Jansson_Lamendella_Crohns	Illumina HiSeq 2000	Illumina V4 515F/806RBC	GT	FWD:GTGCCAGCMGCCGCGGTAA; REV:GGACTACHVGGGTWTCTAAT	Illumina	Yale Center for Genome Analysis	868_L3_L007_R1_sequences	sequencing by synthesis	16S rRNA	V4	21	UBERON:feces	UBERON:feces	UBERON:feces	1232	Non-stricturing, non-penetrating (B1)	Ileocolonic (L3)	no	2010-09-24	CD	TRUE	urban biome	human-associated habitat	feces	human-gut	2010-09-24	Sweden	human	Homo sapiens	1629:646	9606	ICD_nr	60.128	18.644	646	no	LBNL	FALSE	stool	human gut metagenome	female	IBD	1629	4	not applicable
1629.SubjectIBD712	TGTAACGC	GTGCCAGCMGCCGCGGTAA	LBNL	Jansson_Lamendella_Crohns	Illumina HiSeq 2000	Illumina V4 515F/806RBC	GT	FWD:GTGCCAGCMGCCGCGGTAA; REV:GGACTACHVGGGTWTCTAAT	Illumina	Yale Center for Genome Analysis	868_L2_L006_R1_sequences	sequencing by synthesis	16S rRNA	V4	29	UBERON:feces	UBERON:feces	UBERON:feces	416	Non-stricturing, non-penetrating (B1)	Ileocolonic and Upper-GI (L3+L4)	no	2010-03-12	CD	TRUE	urban biome	human-associated habitat	feces	human-gut	2010-03-12	Sweden	human	Homo sapiens	1629:372	9606	ICD_nr	60.128	18.644	372	no	LBNL	FALSE	stool	human gut metagenome	male	IBD	1629	1	not applicable
1629.SubjectIBD644	GAGACAGC	GTGCCAGCMGCCGCGGTAA	LBNL	Jansson_Lamendella_Crohns	Illumina HiSeq 2000	Illumina V4 515F/806RBC	GT	FWD:GTGCCAGCMGCCGCGGTAA; REV:GGACTACHVGGGTWTCTAAT	Illumina	Yale Center for Genome Analysis	868_L2_L006_R1_sequences	sequencing by synthesis	16S rRNA	V4	26	UBERON:feces	UBERON:feces	UBERON:feces	21	Non-stricturing, non-penetrating (B1)	Colonic (L2)	no	2010-05-20	CD	TRUE	urban biome	human-associated habitat	feces	human-gut	2010-05-20	Sweden	human	Homo sapiens	1629:849	9606	CCD	60.128	18.644	849	no	LBNL	FALSE	stool	human gut metagenome	male	IBD	1629	3	not applicable
1629.SubjectIBD647	GATCGCAG	GTGCCAGCMGCCGCGGTAA	LBNL	Jansson_Lamendella_Crohns	Illumina HiSeq 2000	Illumina V4 515F/806RBC	GT	FWD:GTGCCAGCMGCCGCGGTAA; REV:GGACTACHVGGGTWTCTAAT	Illumina	Yale Center for Genome Analysis	868_L4_L008_R1_sequences	sequencing by synthesis	16S rRNA	V4	23	UBERON:feces	UBERON:feces	UBERON:feces	430	Penetrating (B3)	Ileal (L1)	yes	2011-01-12	CD	TRUE	urban biome	human-associated habitat	feces	human-gut	2011-01-12	Sweden	human	Homo sapiens	1629:315	9606	ICD_r	60.128	18.644	315	no	LBNL	FALSE	stool	human gut metagenome	male	IBD	1629	5	not applicable
1629.SubjectIBD687	TAGGGTCC	GTGCCAGCMGCCGCGGTAA	LBNL	Jansson_Lamendella_Crohns	Illumina HiSeq 2000	Illumina V4 515F/806RBC	GT	FWD:GTGCCAGCMGCCGCGGTAA; REV:GGACTACHVGGGTWTCTAAT	Illumina	Yale Center for Genome Analysis	868_L1_L005_R1_sequences	sequencing by synthesis	16S rRNA	V4	29	UBERON:feces	UBERON:feces	UBERON:feces	2058	Non-stricturing, non-penetrating (B1)	Colonic (L2)	no	2009-02-26	CD	TRUE	urban biome	human-associated habitat	feces	human-gut	2009-02-26	Sweden	human	Homo sapiens	1629:875	9606	CCD	60.128	18.644	875	no	LBNL	FALSE	stool	human gut metagenome	female	IBD	1629	1	not applicable
1629.SubjectIBD680	TAAGCCTC	GTGCCAGCMGCCGCGGTAA	LBNL	Jansson_Lamendella_Crohns	Illumina HiSeq 2000	Illumina V4 515F/806RBC	GT	FWD:GTGCCAGCMGCCGCGGTAA; REV:GGACTACHVGGGTWTCTAAT	Illumina	Yale Center for Genome Analysis	868_L3_L007_R1_sequences	sequencing by synthesis	16S rRNA	V4	31	UBERON:feces	UBERON:feces	UBERON:feces	27	Stricturing (B2)	Ileal (L1)	yes	2010-09-08	CD	TRUE	urban biome	human-associated habitat	feces	human-gut	2010-09-08	Sweden	human	Homo sapiens	1629:245	9606	ICD_r	60.128	18.644	245	no	LBNL	FALSE	stool	human gut metagenome	female	IBD	1629	6	not applicable
1629.SubjectIBD719	TTCACGGG	GTGCCAGCMGCCGCGGTAA	LBNL	Jansson_Lamendella_Crohns	Illumina HiSeq 2000	Illumina V4 515F/806RBC	GT	FWD:GTGCCAGCMGCCGCGGTAA; REV:GGACTACHVGGGTWTCTAAT	Illumina	Yale Center for Genome Analysis	868_L3_L007_R1_sequences	sequencing by synthesis	16S rRNA	V4	22	UBERON:feces	UBERON:feces	UBERON:feces	126	Non-stricturing, non-penetrating (B1)	Colonic (L2)	no	2010-09-29	CD	TRUE	urban biome	human-associated habitat	feces	human-gut	2010-09-29	Sweden	human	Homo sapiens	1629:193	9606	CCD	60.128	18.644	193	no	LBNL	FALSE	stool	human gut metagenome	female	IBD	1629	6	not applicable
1629.SubjectIBD631	CGTACTAG	GTGCCAGCMGCCGCGGTAA	LBNL	Jansson_Lamendella_Crohns	Illumina HiSeq 2000	Illumina V4 515F/806RBC	GT	FWD:GTGCCAGCMGCCGCGGTAA; REV:GGACTACHVGGGTWTCTAAT	Illumina	Yale Center for Genome Analysis	868_L2_L006_R1_sequences	sequencing by synthesis	16S rRNA	V4	29	UBERON:feces	UBERON:feces	UBERON:feces	195	Non-stricturing, non-penetrating (B1)	Colonic (L2)	no	2009-10-30	CD	TRUE	urban biome	human-associated habitat	feces	human-gut	2009-10-30	Sweden	human	Homo sapiens	1629:875	9606	CCD	60.128	18.644	875	no	LBNL	FALSE	stool	human gut metagenome	female	IBD	1629	4	not applicable
1629.SubjectIBD639	CTTGCCTT	GTGCCAGCMGCCGCGGTAA	LBNL	Jansson_Lamendella_Crohns	Illumina HiSeq 2000	Illumina V4 515F/806RBC	GT	FWD:GTGCCAGCMGCCGCGGTAA; REV:GGACTACHVGGGTWTCTAAT	Illumina	Yale Center for Genome Analysis	868_L3_L007_R1_sequences	sequencing by synthesis	16S rRNA	V4	24	UBERON:feces	UBERON:feces	UBERON:feces	112	not applicable	not applicable	not applicable	2010-10-04	HC	TRUE	urban biome	human-associated habitat	feces	human-gut	2010-10-04	Sweden	human	Homo sapiens	1629:900	9606	HC	60.128	18.644	900	not applicable	LBNL	FALSE	stool	human gut metagenome	female	IBD	1629	7	not applicable
1629.SubjectIBD723	TTGCCACT	GTGCCAGCMGCCGCGGTAA	LBNL	Jansson_Lamendella_Crohns	Illumina HiSeq 2000	Illumina V4 515F/806RBC	GT	FWD:GTGCCAGCMGCCGCGGTAA; REV:GGACTACHVGGGTWTCTAAT	Illumina	Yale Center for Genome Analysis	868_L3_L007_R1_sequences	sequencing by synthesis	16S rRNA	V4	22	UBERON:feces	UBERON:feces	UBERON:feces	161	not applicable	not applicable	not applicable	2010-12-27	HC	TRUE	urban biome	human-associated habitat	feces	human-gut	2010-12-27	Sweden	human	Homo sapiens	1629:908	9606	HC	60.128	18.644	908	not applicable	LBNL	FALSE	stool	human gut metagenome	female	IBD	1629	7	not applicable
1629.SubjectIBD705	TGAAGAGG	GTGCCAGCMGCCGCGGTAA	LBNL	Jansson_Lamendella_Crohns	Illumina HiSeq 2000	Illumina V4 515F/806RBC	GT	FWD:GTGCCAGCMGCCGCGGTAA; REV:GGACTACHVGGGTWTCTAAT	Illumina	Yale Center for Genome Analysis	868_L1_L005_R1_sequences	sequencing by synthesis	16S rRNA	V4	29	UBERON:feces	UBERON:feces	UBERON:feces	19	Non-stricturing, non-penetrating (B1)	Colonic (L2)	no	2009-03-17	CD	TRUE	urban biome	human-associated habitat	feces	human-gut	2009-03-17	Sweden	human	Homo sapiens	1629:427	9606	CCD	60.128	18.644	427	yes	LBNL	FALSE	stool	human gut metagenome	female	IBD	1629	1	not applicable
1629.SubjectIBD701	TCGTTTCG	GTGCCAGCMGCCGCGGTAA	LBNL	Jansson_Lamendella_Crohns	Illumina HiSeq 2000	Illumina V4 515F/806RBC	GT	FWD:GTGCCAGCMGCCGCGGTAA; REV:GGACTACHVGGGTWTCTAAT	Illumina	Yale Center for Genome Analysis	868_L3_L007_R1_sequences	sequencing by synthesis	16S rRNA	V4	26	UBERON:feces	UBERON:feces	UBERON:feces	41	Stricturing (B2)	Ileal (L1)	yes	2010-10-05	CD	TRUE	urban biome	human-associated habitat	feces	human-gut	2010-10-05	Sweden	human	Homo sapiens	1629:390	9606	ICD_r	60.128	18.644	390	yes	LBNL	FALSE	stool	human gut metagenome	male	IBD	1629	4	not applicable
1629.SubjectIBD702	TCTATCGG	GTGCCAGCMGCCGCGGTAA	LBNL	Jansson_Lamendella_Crohns	Illumina HiSeq 2000	Illumina V4 515F/806RBC	GT	FWD:GTGCCAGCMGCCGCGGTAA; REV:GGACTACHVGGGTWTCTAAT	Illumina	Yale Center for Genome Analysis	868_L3_L007_R1_sequences	sequencing by synthesis	16S rRNA	V4	25	UBERON:feces	UBERON:feces	UBERON:feces	212	Non-stricturing, non-penetrating (B1)	Colonic (L2)	no	2010-09-16	CD	TRUE	urban biome	human-associated habitat	feces	human-gut	2010-09-16	Sweden	human	Homo sapiens	67 days, 21:01:00	9606	CCD	60.128	18.644	1	no	LBNL	FALSE	stool	human gut metagenome	male	IBD	1629	3	not applicable
1629.SubjectIBD559	AATGGCCT	GTGCCAGCMGCCGCGGTAA	LBNL	Jansson_Lamendella_Crohns	Illumina HiSeq 2000	Illumina V4 515F/806RBC	GT	FWD:GTGCCAGCMGCCGCGGTAA; REV:GGACTACHVGGGTWTCTAAT	Illumina	Yale Center for Genome Analysis	868_L1_L005_R1_sequences	sequencing by synthesis	16S rRNA	V4	23	UBERON:feces	UBERON:feces	UBERON:feces	126	Stricturing (B2)	Ileal (L1)	yes	2009-04-06	CD	TRUE	urban biome	human-associated habitat	feces	human-gut	2009-04-06	Sweden	human	Homo sapiens	1629:190	9606	ICD_r	60.128	18.644	190	no	LBNL	FALSE	stool	human gut metagenome	female	IBD	1629	1	not applicable
1629.SubjectIBD725	TTGTCAAT	GTGCCAGCMGCCGCGGTAA	LBNL	Jansson_Lamendella_Crohns	Illumina HiSeq 2000	Illumina V4 515F/806RBC	GT	FWD:GTGCCAGCMGCCGCGGTAA; REV:GGACTACHVGGGTWTCTAAT	Illumina	Yale Center for Genome Analysis	868_L1_L005_R1_sequences	sequencing by synthesis	16S rRNA	V4	27	UBERON:feces	UBERON:feces	UBERON:feces	69	Stricturing (B2)	Ileal (L1)	yes	2009-06-23	CD	TRUE	urban biome	human-associated habitat	feces	human-gut	2009-06-23	Sweden	human	Homo sapiens	1629:739	9606	ICD_r	60.128	18.644	739	yes	LBNL	FALSE	stool	human gut metagenome	male	IBD	1629	2	not applicable
1629.SubjectIBD567	ACCTAGAG	GTGCCAGCMGCCGCGGTAA	LBNL	Jansson_Lamendella_Crohns	Illumina HiSeq 2000	Illumina V4 515F/806RBC	GT	FWD:GTGCCAGCMGCCGCGGTAA; REV:GGACTACHVGGGTWTCTAAT	Illumina	Yale Center for Genome Analysis	868_L3_L007_R1_sequences	sequencing by synthesis	16S rRNA	V4	29	UBERON:feces	UBERON:feces	UBERON:feces	191	Penetrating (B3)	Ileocolonic (L3)	yes	2010-09-30	CD	TRUE	urban biome	human-associated habitat	feces	human-gut	2010-09-30	Sweden	human	Homo sapiens	1629:553	9606	ICD_r	60.128	18.644	553	no	LBNL	FALSE	stool	human gut metagenome	female	IBD	1629	6	not applicable
1629.SubjectIBD560	AATGGCCT	GTGCCAGCMGCCGCGGTAA	LBNL	Jansson_Lamendella_Crohns	Illumina HiSeq 2000	Illumina V4 515F/806RBC	GT	FWD:GTGCCAGCMGCCGCGGTAA; REV:GGACTACHVGGGTWTCTAAT	Illumina	Yale Center for Genome Analysis	868_L2_L006_R1_sequences	sequencing by synthesis	16S rRNA	V4	26	UBERON:feces	UBERON:feces	UBERON:feces	23	Non-stricturing, non-penetrating (B1)	Colonic (L2)	no	2009-09-16	CD	TRUE	urban biome	human-associated habitat	feces	human-gut	2009-09-16	Sweden	human	Homo sapiens	1629:884	9606	CCD	60.128	18.644	884	no	LBNL	FALSE	stool	human gut metagenome	male	IBD	1629	2	not applicable
1629.SubjectIBD718	TTATATTG	GTGCCAGCMGCCGCGGTAA	LBNL	Jansson_Lamendella_Crohns	Illumina HiSeq 2000	Illumina V4 515F/806RBC	GT	FWD:GTGCCAGCMGCCGCGGTAA; REV:GGACTACHVGGGTWTCTAAT	Illumina	Yale Center for Genome Analysis	868_L2_L006_R1_sequences	sequencing by synthesis	16S rRNA	V4	23	UBERON:feces	UBERON:feces	UBERON:feces	141	not applicable	not applicable	not applicable	2009-06-10	HC	TRUE	urban biome	human-associated habitat	feces	human-gut	2009-06-10	Sweden	human	Homo sapiens	1629:906	9606	HC	60.128	18.644	906	not applicable	LBNL	FALSE	stool	human gut metagenome	male	IBD	1629	2	not applicable
1629.SubjectIBD662	GCTAGATG	GTGCCAGCMGCCGCGGTAA	LBNL	Jansson_Lamendella_Crohns	Illumina HiSeq 2000	Illumina V4 515F/806RBC	GT	FWD:GTGCCAGCMGCCGCGGTAA; REV:GGACTACHVGGGTWTCTAAT	Illumina	Yale Center for Genome Analysis	868_L1_L005_R1_sequences	sequencing by synthesis	16S rRNA	V4	22	UBERON:feces	UBERON:feces	UBERON:feces	345	Non-stricturing, non-penetrating (B1)	Ileocolonic (L3)	yes	2010-03-08	CD	TRUE	urban biome	human-associated habitat	feces	human-gut	2010-03-08	Sweden	human	Homo sapiens	1629:74	9606	ICD_r	60.128	18.644	74	no	LBNL	FALSE	stool	human gut metagenome	female	IBD	1629	5	not applicable
1629.SubjectIBD661	GCGCTAAA	GTGCCAGCMGCCGCGGTAA	LBNL	Jansson_Lamendella_Crohns	Illumina HiSeq 2000	Illumina V4 515F/806RBC	GT	FWD:GTGCCAGCMGCCGCGGTAA; REV:GGACTACHVGGGTWTCTAAT	Illumina	Yale Center for Genome Analysis	868_L3_L007_R1_sequences	sequencing by synthesis	16S rRNA	V4	21	UBERON:feces	UBERON:feces	UBERON:feces	834	Stricturing (B2)	Ileal (L1)	yes	2010-09-30	CD	TRUE	urban biome	human-associated habitat	feces	human-gut	2010-09-30	Sweden	human	Homo sapiens	1629:671	9606	ICD_r	60.128	18.644	671	yes	LBNL	FALSE	stool	human gut metagenome	male	IBD	1629	3	not applicable
1629.SubjectIBD626	CGATGTCG	GTGCCAGCMGCCGCGGTAA	LBNL	Jansson_Lamendella_Crohns	Illumina HiSeq 2000	Illumina V4 515F/806RBC	GT	FWD:GTGCCAGCMGCCGCGGTAA; REV:GGACTACHVGGGTWTCTAAT	Illumina	Yale Center for Genome Analysis	868_L3_L007_R1_sequences	sequencing by synthesis	16S rRNA	V4	25	UBERON:feces	UBERON:feces	UBERON:feces	19.9	not applicable	not applicable	not applicable	2010-11-17	HC	TRUE	urban biome	human-associated habitat	feces	human-gut	2010-11-17	Sweden	human	Homo sapiens	1629:895	9606	HC	60.128	18.644	895	not applicable	LBNL	FALSE	stool	human gut metagenome	female	IBD	1629	5	not applicable
1629.SubjectIBD659	GCCTTCTA	GTGCCAGCMGCCGCGGTAA	LBNL	Jansson_Lamendella_Crohns	Illumina HiSeq 2000	Illumina V4 515F/806RBC	GT	FWD:GTGCCAGCMGCCGCGGTAA; REV:GGACTACHVGGGTWTCTAAT	Illumina	Yale Center for Genome Analysis	868_L3_L007_R1_sequences	sequencing by synthesis	16S rRNA	V4	23	UBERON:feces	UBERON:feces	UBERON:feces	15.8	not applicable	not applicable	not applicable	2010-10-04	HC	TRUE	urban biome	human-associated habitat	feces	human-gut	2010-10-04	Sweden	human	Homo sapiens	1629:906	9606	HC	60.128	18.644	906	not applicable	LBNL	FALSE	stool	human gut metagenome	male	IBD	1629	6	not applicable
1629.SubjectIBD582	AGTGACGT	GTGCCAGCMGCCGCGGTAA	LBNL	Jansson_Lamendella_Crohns	Illumina HiSeq 2000	Illumina V4 515F/806RBC	GT	FWD:GTGCCAGCMGCCGCGGTAA; REV:GGACTACHVGGGTWTCTAAT	Illumina	Yale Center for Genome Analysis	868_L3_L007_R1_sequences	sequencing by synthesis	16S rRNA	V4	22	UBERON:feces	UBERON:feces	UBERON:feces	376	Non-stricturing, non-penetrating (B1)	Ileocolonic (L3)	yes	2010-12-02	CD	TRUE	urban biome	human-associated habitat	feces	human-gut	2010-12-02	Sweden	human	Homo sapiens	1629:74	9606	ICD_r	60.128	18.644	74	no	LBNL	FALSE	stool	human gut metagenome	female	IBD	1629	8	not applicable
1629.SubjectIBD581	AGGTTTGC	GTGCCAGCMGCCGCGGTAA	LBNL	Jansson_Lamendella_Crohns	Illumina HiSeq 2000	Illumina V4 515F/806RBC	GT	FWD:GTGCCAGCMGCCGCGGTAA; REV:GGACTACHVGGGTWTCTAAT	Illumina	Yale Center for Genome Analysis	868_L2_L006_R1_sequences	sequencing by synthesis	16S rRNA	V4	22	UBERON:feces	UBERON:feces	UBERON:feces	126	Non-stricturing, non-penetrating (B1)	Colonic (L2)	no	2010-03-23	CD	TRUE	urban biome	human-associated habitat	feces	human-gut	2010-03-23	Sweden	human	Homo sapiens	1629:193	9606	CCD	60.128	18.644	193	no	LBNL	FALSE	stool	human gut metagenome	female	IBD	1629	3	not applicable
1629.SubjectIBD576	AGATTCGT	GTGCCAGCMGCCGCGGTAA	LBNL	Jansson_Lamendella_Crohns	Illumina HiSeq 2000	Illumina V4 515F/806RBC	GT	FWD:GTGCCAGCMGCCGCGGTAA; REV:GGACTACHVGGGTWTCTAAT	Illumina	Yale Center for Genome Analysis	868_L4_L008_R1_sequences	sequencing by synthesis	16S rRNA	V4	25	UBERON:feces	UBERON:feces	UBERON:feces	430	Non-stricturing, non-penetrating (B1)	Colonic (L2)	no	2010-03-30	CD	TRUE	urban biome	human-associated habitat	feces	human-gut	2010-03-30	Sweden	human	Homo sapiens	67 days, 21:01:00	9606	CCD	60.128	18.644	1	no	LBNL	FALSE	stool	human gut metagenome	male	IBD	1629	1	not applicable
1629.SubjectIBD575	AGAGGAGA	GTGCCAGCMGCCGCGGTAA	LBNL	Jansson_Lamendella_Crohns	Illumina HiSeq 2000	Illumina V4 515F/806RBC	GT	FWD:GTGCCAGCMGCCGCGGTAA; REV:GGACTACHVGGGTWTCTAAT	Illumina	Yale Center for Genome Analysis	868_L3_L007_R1_sequences	sequencing by synthesis	16S rRNA	V4	23	UBERON:feces	UBERON:feces	UBERON:feces	430	Penetrating (B3)	Ileal (L1)	yes	2011-01-12	CD	TRUE	urban biome	human-associated habitat	feces	human-gut	2011-01-12	Sweden	human	Homo sapiens	1629:315	9606	ICD_r	60.128	18.644	315	no	LBNL	FALSE	stool	human gut metagenome	male	IBD	1629	5	not applicable
1629.SubjectIBD574	AGACTGCG	GTGCCAGCMGCCGCGGTAA	LBNL	Jansson_Lamendella_Crohns	Illumina HiSeq 2000	Illumina V4 515F/806RBC	GT	FWD:GTGCCAGCMGCCGCGGTAA; REV:GGACTACHVGGGTWTCTAAT	Illumina	Yale Center for Genome Analysis	868_L3_L007_R1_sequences	sequencing by synthesis	16S rRNA	V4	23	UBERON:feces	UBERON:feces	UBERON:feces	not applicable	Stricturing (B2)	Ileocolonic (L3)	yes	2010-09-09	CD	TRUE	urban biome	human-associated habitat	feces	human-gut	2010-09-09	Sweden	human	Homo sapiens	1629:211	9606	ICD_r	60.128	18.644	211	no	LBNL	FALSE	stool	human gut metagenome	male	IBD	1629	6	not applicable
1629.SubjectIBD613	CCACGAAG	GTGCCAGCMGCCGCGGTAA	LBNL	Jansson_Lamendella_Crohns	Illumina HiSeq 2000	Illumina V4 515F/806RBC	GT	FWD:GTGCCAGCMGCCGCGGTAA; REV:GGACTACHVGGGTWTCTAAT	Illumina	Yale Center for Genome Analysis	868_L1_L005_R1_sequences	sequencing by synthesis	16S rRNA	V4	22	UBERON:feces	UBERON:feces	UBERON:feces	576	Non-stricturing, non-penetrating (B1)	Ileocolonic (L3)	yes	2010-05-27	CD	TRUE	urban biome	human-associated habitat	feces	human-gut	2010-05-27	Sweden	human	Homo sapiens	1629:74	9606	ICD_r	60.128	18.644	74	no	LBNL	FALSE	stool	human gut metagenome	female	IBD	1629	6	not applicable
1629.SubjectIBD611	CATCAAAC	GTGCCAGCMGCCGCGGTAA	LBNL	Jansson_Lamendella_Crohns	Illumina HiSeq 2000	Illumina V4 515F/806RBC	GT	FWD:GTGCCAGCMGCCGCGGTAA; REV:GGACTACHVGGGTWTCTAAT	Illumina	Yale Center for Genome Analysis	868_L3_L007_R1_sequences	sequencing by synthesis	16S rRNA	V4	23	UBERON:feces	UBERON:feces	UBERON:feces	413	Stricturing (B2)	Ileal (L1)	yes	2010-12-23	CD	TRUE	urban biome	human-associated habitat	feces	human-gut	2010-12-23	Sweden	human	Homo sapiens	1629:190	9606	ICD_r	60.128	18.644	190	no	LBNL	FALSE	stool	human gut metagenome	female	IBD	1629	8	not applicable
1629.SubjectIBD578	AGCAACGG	GTGCCAGCMGCCGCGGTAA	LBNL	Jansson_Lamendella_Crohns	Illumina HiSeq 2000	Illumina V4 515F/806RBC	GT	FWD:GTGCCAGCMGCCGCGGTAA; REV:GGACTACHVGGGTWTCTAAT	Illumina	Yale Center for Genome Analysis	868_L2_L006_R1_sequences	sequencing by synthesis	16S rRNA	V4	22	UBERON:feces	UBERON:feces	UBERON:feces	345	Non-stricturing, non-penetrating (B1)	Ileocolonic (L3)	yes	2010-03-08	CD	TRUE	urban biome	human-associated habitat	feces	human-gut	2010-03-08	Sweden	human	Homo sapiens	1629:74	9606	ICD_r	60.128	18.644	74	no	LBNL	FALSE	stool	human gut metagenome	female	IBD	1629	5	not applicable
1629.SubjectIBD640	GAAAGCGA	GTGCCAGCMGCCGCGGTAA	LBNL	Jansson_Lamendella_Crohns	Illumina HiSeq 2000	Illumina V4 515F/806RBC	GT	FWD:GTGCCAGCMGCCGCGGTAA; REV:GGACTACHVGGGTWTCTAAT	Illumina	Yale Center for Genome Analysis	868_L4_L008_R1_sequences	sequencing by synthesis	16S rRNA	V4	25	UBERON:feces	UBERON:feces	UBERON:feces	38	not applicable	not applicable	not applicable	2011-06-17	HC	TRUE	urban biome	human-associated habitat	feces	human-gut	2011-06-17	Sweden	human	Homo sapiens	1629:895	9606	HC	60.128	18.644	895	not applicable	LBNL	FALSE	stool	human gut metagenome	female	IBD	1629	7	not applicable
1629.SubjectIBD699	TCGTTGGA	GTGCCAGCMGCCGCGGTAA	LBNL	Jansson_Lamendella_Crohns	Illumina HiSeq 2000	Illumina V4 515F/806RBC	GT	FWD:GTGCCAGCMGCCGCGGTAA; REV:GGACTACHVGGGTWTCTAAT	Illumina	Yale Center for Genome Analysis	868_L3_L007_R1_sequences	sequencing by synthesis	16S rRNA	V4	28	UBERON:feces	UBERON:feces	UBERON:feces	212	Stricturing (B2)	Ileocolonic (L3)	no	2011-11-23	CD	TRUE	urban biome	human-associated habitat	feces	human-gut	2011-11-23	Sweden	human	Homo sapiens	1629:651	9606	ICD_nr	60.128	18.644	651	no	LBNL	FALSE	stool	human gut metagenome	male	IBD	1629	8	not applicable
1629.SubjectIBD599	ATTCTAGC	GTGCCAGCMGCCGCGGTAA	LBNL	Jansson_Lamendella_Crohns	Illumina HiSeq 2000	Illumina V4 515F/806RBC	GT	FWD:GTGCCAGCMGCCGCGGTAA; REV:GGACTACHVGGGTWTCTAAT	Illumina	Yale Center for Genome Analysis	868_L3_L007_R1_sequences	sequencing by synthesis	16S rRNA	V4	25	UBERON:feces	UBERON:feces	UBERON:feces	40	not applicable	not applicable	not applicable	2010-08-19	HC	TRUE	urban biome	human-associated habitat	feces	human-gut	2010-08-19	Sweden	human	Homo sapiens	1629:895	9606	HC	60.128	18.644	895	not applicable	LBNL	FALSE	stool	human gut metagenome	female	IBD	1629	4	not applicable
1629.SubjectIBD594	ATGACCAT	GTGCCAGCMGCCGCGGTAA	LBNL	Jansson_Lamendella_Crohns	Illumina HiSeq 2000	Illumina V4 515F/806RBC	GT	FWD:GTGCCAGCMGCCGCGGTAA; REV:GGACTACHVGGGTWTCTAAT	Illumina	Yale Center for Genome Analysis	868_L3_L007_R1_sequences	sequencing by synthesis	16S rRNA	V4	23	UBERON:feces	UBERON:feces	UBERON:feces	223	Stricturing (B2)	Ileal (L1)	yes	2010-09-30	CD	TRUE	urban biome	human-associated habitat	feces	human-gut	2010-09-30	Sweden	human	Homo sapiens	1629:190	9606	ICD_r	60.128	18.644	190	no	LBNL	FALSE	stool	human gut metagenome	female	IBD	1629	7	not applicable
1629.SubjectIBD591	ATCTGCCT	GTGCCAGCMGCCGCGGTAA	LBNL	Jansson_Lamendella_Crohns	Illumina HiSeq 2000	Illumina V4 515F/806RBC	GT	FWD:GTGCCAGCMGCCGCGGTAA; REV:GGACTACHVGGGTWTCTAAT	Illumina	Yale Center for Genome Analysis	868_L3_L007_R1_sequences	sequencing by synthesis	16S rRNA	V4	26	UBERON:feces	UBERON:feces	UBERON:feces	16.3	Non-stricturing, non-penetrating (B1)	Colonic (L2)	no	2010-12-07	CD	TRUE	urban biome	human-associated habitat	feces	human-gut	2010-12-07	Sweden	human	Homo sapiens	1629:849	9606	CCD	60.128	18.644	849	no	LBNL	FALSE	stool	human gut metagenome	male	IBD	1629	5	not applicable
1629.SubjectIBD325	GGTATGAC	GTGCCAGCMGCCGCGGTAA	LBNL	Jansson_Lamendella_Crohns	Illumina HiSeq 2000	Illumina V4 515F/806RBC	GT	FWD:GTGCCAGCMGCCGCGGTAA; REV:GGACTACHVGGGTWTCTAAT	Illumina	Yale Center for Genome Analysis	868_L2_L006_R1_sequences	sequencing by synthesis	16S rRNA	V4	26	UBERON:feces	UBERON:feces	UBERON:feces	571	Stricturing (B2)	Ileal (L1)	yes	2010-07-02	CD	TRUE	urban biome	human-associated habitat	feces	human-gut	2010-07-02	Sweden	human	Homo sapiens	1629:525	9606	ICD_r	60.128	18.644	525	no	LBNL	FALSE	stool	human gut metagenome	male	IBD	1629	3	not applicable
1629.SubjectIBD323	CTGAACGC	GTGCCAGCMGCCGCGGTAA	LBNL	Jansson_Lamendella_Crohns	Illumina HiSeq 2000	Illumina V4 515F/806RBC	GT	FWD:GTGCCAGCMGCCGCGGTAA; REV:GGACTACHVGGGTWTCTAAT	Illumina	Yale Center for Genome Analysis	868_L2_L006_R1_sequences	sequencing by synthesis	16S rRNA	V4	26	UBERON:feces	UBERON:feces	UBERON:feces	435	Stricturing (B2)	Ileal (L1)	yes	2010-03-01	CD	TRUE	urban biome	human-associated habitat	feces	human-gut	2010-03-01	Sweden	human	Homo sapiens	1629:525	9606	ICD_r	60.128	18.644	525	no	LBNL	FALSE	stool	human gut metagenome	male	IBD	1629	1	not applicable
1629.SubjectIBD218	GCCTTAAG	GTGCCAGCMGCCGCGGTAA	LBNL	Jansson_Lamendella_Crohns	Illumina HiSeq 2000	Illumina V4 515F/806RBC	GT	FWD:GTGCCAGCMGCCGCGGTAA; REV:GGACTACHVGGGTWTCTAAT	Illumina	Yale Center for Genome Analysis	868_L2_L006_R1_sequences	sequencing by synthesis	16S rRNA	V4	29	UBERON:feces	UBERON:feces	UBERON:feces	254	Stricturing (B2)	Ileal (L1)	yes	2010-06-17	CD	TRUE	urban biome	human-associated habitat	feces	human-gut	2010-06-17	Sweden	human	Homo sapiens	1629:318	9606	ICD_r	60.128	18.644	318	no	LBNL	FALSE	stool	human gut metagenome	male	IBD	1629	2	not applicable
1629.SubjectIBD032	CGCAATCG	GTGCCAGCMGCCGCGGTAA	LBNL	Jansson_Lamendella_Crohns	Illumina HiSeq 2000	Illumina V4 515F/806RBC	GT	FWD:GTGCCAGCMGCCGCGGTAA; REV:GGACTACHVGGGTWTCTAAT	Illumina	Yale Center for Genome Analysis	868_L2_L006_R1_sequences	sequencing by synthesis	16S rRNA	V4	22	UBERON:feces	UBERON:feces	UBERON:feces	428	Non-stricturing, non-penetrating (B1)	Ileocolonic (L3)	yes	2009-03-12	CD	TRUE	urban biome	human-associated habitat	feces	human-gut	2009-03-12	Sweden	human	Homo sapiens	1629:74	9606	ICD_r	60.128	18.644	74	no	LBNL	FALSE	stool	human gut metagenome	female	IBD	1629	1	not applicable
1629.SubjectIBD033	AGAGCGCC	GTGCCAGCMGCCGCGGTAA	LBNL	Jansson_Lamendella_Crohns	Illumina HiSeq 2000	Illumina V4 515F/806RBC	GT	FWD:GTGCCAGCMGCCGCGGTAA; REV:GGACTACHVGGGTWTCTAAT	Illumina	Yale Center for Genome Analysis	868_L2_L006_R1_sequences	sequencing by synthesis	16S rRNA	V4	22	UBERON:feces	UBERON:feces	UBERON:feces	501	Non-stricturing, non-penetrating (B1)	Ileocolonic (L3)	yes	2009-09-02	CD	TRUE	urban biome	human-associated habitat	feces	human-gut	2009-09-02	Sweden	human	Homo sapiens	1629:74	9606	ICD_r	60.128	18.644	74	no	LBNL	FALSE	stool	human gut metagenome	female	IBD	1629	3	not applicable
1629.SubjectIBD139	CTTGATGC	GTGCCAGCMGCCGCGGTAA	LBNL	Jansson_Lamendella_Crohns	Illumina HiSeq 2000	Illumina V4 515F/806RBC	GT	FWD:GTGCCAGCMGCCGCGGTAA; REV:GGACTACHVGGGTWTCTAAT	Illumina	Yale Center for Genome Analysis	868_L1_L005_R1_sequences	sequencing by synthesis	16S rRNA	V4	23	UBERON:feces	UBERON:feces	UBERON:feces	not applicable	Stricturing (B2)	Ileocolonic (L3)	yes	2010-05-04	CD	TRUE	urban biome	human-associated habitat	feces	human-gut	2010-05-04	Sweden	human	Homo sapiens	1629:211	9606	ICD_r	60.128	18.644	211	no	LBNL	FALSE	stool	human gut metagenome	male	IBD	1629	5	not applicable
1629.SubjectIBD138	ACATCACT	GTGCCAGCMGCCGCGGTAA	LBNL	Jansson_Lamendella_Crohns	Illumina HiSeq 2000	Illumina V4 515F/806RBC	GT	FWD:GTGCCAGCMGCCGCGGTAA; REV:GGACTACHVGGGTWTCTAAT	Illumina	Yale Center for Genome Analysis	868_L2_L006_R1_sequences	sequencing by synthesis	16S rRNA	V4	23	UBERON:feces	UBERON:feces	UBERON:feces	not applicable	Stricturing (B2)	Ileocolonic (L3)	yes	2010-02-10	CD	TRUE	urban biome	human-associated habitat	feces	human-gut	2010-02-10	Sweden	human	Homo sapiens	1629:211	9606	ICD_r	60.128	18.644	211	no	LBNL	FALSE	stool	human gut metagenome	male	IBD	1629	4	not applicable
1629.SubjectIBD034	TTGTCAAT	GTGCCAGCMGCCGCGGTAA	LBNL	Jansson_Lamendella_Crohns	Illumina HiSeq 2000	Illumina V4 515F/806RBC	GT	FWD:GTGCCAGCMGCCGCGGTAA; REV:GGACTACHVGGGTWTCTAAT	Illumina	Yale Center for Genome Analysis	868_L2_L006_R1_sequences	sequencing by synthesis	16S rRNA	V4	22	UBERON:feces	UBERON:feces	UBERON:feces	293	Non-stricturing, non-penetrating (B1)	Ileocolonic (L3)	yes	2009-11-26	CD	TRUE	urban biome	human-associated habitat	feces	human-gut	2009-11-26	Sweden	human	Homo sapiens	1629:74	9606	ICD_r	60.128	18.644	74	no	LBNL	FALSE	stool	human gut metagenome	female	IBD	1629	4	not applicable
1629.SubjectIBD047	TCGAGACG	GTGCCAGCMGCCGCGGTAA	LBNL	Jansson_Lamendella_Crohns	Illumina HiSeq 2000	Illumina V4 515F/806RBC	GT	FWD:GTGCCAGCMGCCGCGGTAA; REV:GGACTACHVGGGTWTCTAAT	Illumina	Yale Center for Genome Analysis	868_L4_L008_R1_sequences	sequencing by synthesis	16S rRNA	V4	33	UBERON:feces	UBERON:feces	UBERON:feces	468	Stricturing (B2)	Ileal (L1)	no	2011-02-10	CD	TRUE	urban biome	human-associated habitat	feces	human-gut	2011-02-10	Sweden	human	Homo sapiens	1629:93	9606	ICD_nr	60.128	18.644	93	no	LBNL	FALSE	stool	human gut metagenome	female	IBD	1629	7	not applicable
1629.SubjectIBD046	GTCCGGCT	GTGCCAGCMGCCGCGGTAA	LBNL	Jansson_Lamendella_Crohns	Illumina HiSeq 2000	Illumina V4 515F/806RBC	GT	FWD:GTGCCAGCMGCCGCGGTAA; REV:GGACTACHVGGGTWTCTAAT	Illumina	Yale Center for Genome Analysis	868_L3_L007_R1_sequences	sequencing by synthesis	16S rRNA	V4	33	UBERON:feces	UBERON:feces	UBERON:feces	255	Stricturing (B2)	Ileal (L1)	no	2010-11-11	CD	TRUE	urban biome	human-associated habitat	feces	human-gut	2010-11-11	Sweden	human	Homo sapiens	1629:93	9606	ICD_nr	60.128	18.644	93	no	LBNL	FALSE	stool	human gut metagenome	female	IBD	1629	6	not applicable
1629.SubjectIBD045	TAGCCGGC	GTGCCAGCMGCCGCGGTAA	LBNL	Jansson_Lamendella_Crohns	Illumina HiSeq 2000	Illumina V4 515F/806RBC	GT	FWD:GTGCCAGCMGCCGCGGTAA; REV:GGACTACHVGGGTWTCTAAT	Illumina	Yale Center for Genome Analysis	868_L3_L007_R1_sequences	sequencing by synthesis	16S rRNA	V4	33	UBERON:feces	UBERON:feces	UBERON:feces	184	Stricturing (B2)	Ileal (L1)	no	2010-08-17	CD	TRUE	urban biome	human-associated habitat	feces	human-gut	2010-08-17	Sweden	human	Homo sapiens	1629:93	9606	ICD_nr	60.128	18.644	93	no	LBNL	FALSE	stool	human gut metagenome	female	IBD	1629	5	not applicable
1629.SubjectIBD044	CTCAATGA	GTGCCAGCMGCCGCGGTAA	LBNL	Jansson_Lamendella_Crohns	Illumina HiSeq 2000	Illumina V4 515F/806RBC	GT	FWD:GTGCCAGCMGCCGCGGTAA; REV:GGACTACHVGGGTWTCTAAT	Illumina	Yale Center for Genome Analysis	868_L2_L006_R1_sequences	sequencing by synthesis	16S rRNA	V4	33	UBERON:feces	UBERON:feces	UBERON:feces	120	Stricturing (B2)	Ileal (L1)	no	2010-05-19	CD	TRUE	urban biome	human-associated habitat	feces	human-gut	2010-05-19	Sweden	human	Homo sapiens	1629:93	9606	ICD_nr	60.128	18.644	93	no	LBNL	FALSE	stool	human gut metagenome	female	IBD	1629	4	not applicable
1629.SubjectIBD043	TCGATGAA	GTGCCAGCMGCCGCGGTAA	LBNL	Jansson_Lamendella_Crohns	Illumina HiSeq 2000	Illumina V4 515F/806RBC	GT	FWD:GTGCCAGCMGCCGCGGTAA; REV:GGACTACHVGGGTWTCTAAT	Illumina	Yale Center for Genome Analysis	868_L2_L006_R1_sequences	sequencing by synthesis	16S rRNA	V4	33	UBERON:feces	UBERON:feces	UBERON:feces	181	Stricturing (B2)	Ileal (L1)	no	2010-02-17	CD	TRUE	urban biome	human-associated habitat	feces	human-gut	2010-02-17	Sweden	human	Homo sapiens	1629:93	9606	ICD_nr	60.128	18.644	93	no	LBNL	FALSE	stool	human gut metagenome	female	IBD	1629	3	not applicable
1629.SubjectIBD049	AACAATGG	GTGCCAGCMGCCGCGGTAA	LBNL	Jansson_Lamendella_Crohns	Illumina HiSeq 2000	Illumina V4 515F/806RBC	GT	FWD:GTGCCAGCMGCCGCGGTAA; REV:GGACTACHVGGGTWTCTAAT	Illumina	Yale Center for Genome Analysis	868_L2_L006_R1_sequences	sequencing by synthesis	16S rRNA	V4	33	UBERON:feces	UBERON:feces	UBERON:feces	541	Stricturing (B2)	Ileal (L1)	no	2009-08-25	CD	TRUE	urban biome	human-associated habitat	feces	human-gut	2009-08-25	Sweden	human	Homo sapiens	1629:93	9606	ICD_nr	60.128	18.644	93	no	LBNL	FALSE	stool	human gut metagenome	female	IBD	1629	1	not applicable
1629.SubjectIBD048	GTCAAGAA	GTGCCAGCMGCCGCGGTAA	LBNL	Jansson_Lamendella_Crohns	Illumina HiSeq 2000	Illumina V4 515F/806RBC	GT	FWD:GTGCCAGCMGCCGCGGTAA; REV:GGACTACHVGGGTWTCTAAT	Illumina	Yale Center for Genome Analysis	868_L4_L008_R1_sequences	sequencing by synthesis	16S rRNA	V4	33	UBERON:feces	UBERON:feces	UBERON:feces	404	Stricturing (B2)	Ileal (L1)	no	2011-05-17	CD	TRUE	urban biome	human-associated habitat	feces	human-gut	2011-05-17	Sweden	human	Homo sapiens	1629:93	9606	ICD_nr	60.128	18.644	93	no	LBNL	FALSE	stool	human gut metagenome	female	IBD	1629	8	not applicable
[truncated: 2 more columns]
